# Supplementary material for: Regioselective peri-C–H selenylation of aromatic compounds with weakly coordinating ketone groups
Source: Royal Society of Chemistry journal article supplement (doi:10.1039/d2cc04030a), 2022-01-01

## Supporting Information

### Regioselective *peri*-C–H Selenylation of Aromatic Compounds with Weakly Coordinating Ketone Groups

Bingbing Duan,<sup>a</sup> Yao Wu,<sup>a</sup> Yi Gao,<sup>a</sup> Linkun Ying<sup>a</sup>, Jielin Tang,<sup>a</sup> Shiyu Hu,<sup>a</sup> Qihua Zhao<sup>\*b</sup> and Zengqiang Song<sup>\*a</sup>

*School of Pharmaceutical Sciences, WenzhouMedical University, Wenzhou, Zhejiang, 325035, China; e-mail: [songzengqiang09@163.com](mailto:songzengqiang09@163.com)*

*School of Chemistry and Molecular Engineering, East China Normal University, Shanghai, 200241, China; e-mail: [qhzhao@chem.ecnu.edu.cn](mailto:qhzhao@chem.ecnu.edu.cn)*

## Table of Contents

|                                                                                                     |    |
|-----------------------------------------------------------------------------------------------------|----|
| General information and materials                                                                   | 3  |
| General procedures for synthesis                                                                    | 3  |
| Optimization of reaction conditions                                                                 | 4  |
| Study on reaction mechanism                                                                         | 5  |
| X-ray structure of <b>3a</b> and <b>6h</b>                                                          | 11 |
| Characterization of products <b>3</b> , <b>6</b> and <b>7</b>                                       | 15 |
| Copies of $^1\text{H}$ and $^{13}\text{C}$ NMR spectra of products <b>3</b> , <b>6</b> and <b>7</b> | 32 |

## General information and materials:

Unless otherwise noted, all commercially available compounds were used as provided without further purification. Solvents for chromatography were technical grade. Column chromatography was performed using silica gel Merck 60 (particle size 0.040-0.063 mm). Solvent mixtures are understood as volume/volume.

$^1\text{H}$ -NMR and  $^{13}\text{C}$ -NMR were recorded on a Bruker DRX400 (400 MHz), DRX500 (500 MHz) and DRX600 (600 MHz) spectrometer in  $\text{CDCl}_3$  ( $\delta = 7.26$  ppm for  $^1\text{H}$ ,  $\delta = 77.00$  ppm for  $^{13}\text{C}$ ) and in  $\text{DMSO}-d_6$  ( $\delta = 2.50$  ppm for  $^1\text{H}$ ,  $\delta = 39.43$  ppm for  $^{13}\text{C}$ ). Data are reported in the following order: chemical shift ( $\delta$ ) in ppm; multiplicities are indicated s (singlet), d (doublet), t (triplet), q (quartet), m (multiplet); coupling constants ( $J$ ) are given in Hertz (Hz). High resolution mass spectra were recorded on a LTQ Orbitrap mass spectrometer coupled to an Acceka HPLC-System (HPLC column: Hypersyl GOLD, 50 mm  $\times$  1 mm, 1.9  $\mu\text{m}$ ). Chemical yields refer to isolated pure substances.

## General procedures for synthesis

### 1. General procedure for the synthesis of products 3:

A mixture of chromones **1** (0.2 mmol), diselenides **2** (0.24 mmol),  $[\text{Ru}(p\text{-cymene})\text{Cl}_2]_2$  (10 mol%),  $\text{AgNTf}_2$  (40 mol%),  $\text{Cu}(\text{OAc})_2$  (50 mol%),  $\text{CuCl}$  (2 equiv), and chlorobenzene (2 mL), was added in a 5 mL glass tube, which was stirred at 120  $^\circ\text{C}$  for 24–72 h in air. The reaction was stopped, and it was mixed with water and ethyl acetate. The reaction mixture was extracted three times with ethyl acetate. The combined organic layer was dried over anhydrous magnesium sulfate, and filtered. The filtrate was evaporated under a vacuum, and the residue was purified by flash column chromatography on silica gel (eluting with petroleum ether-ethyl acetate) to provide the desired product **3**.

### 2. General procedure for the synthesis of products 6:

A mixture of heteroarenes **1** (0.2 mmol), diselenides **2** (0.4 mmol),  $[\text{Ru}(p\text{-cymene})\text{Cl}_2]_2$  (10 mol%),  $\text{AgNTf}_2$  (40 mol%),  $\text{Cu}(\text{OAc})_2$  (50 mol%),  $\text{CuCl}$  (2 equiv), and chlorobenzene (2 mL), was added in a 5 mL glass tube, which was stirred at 120  $^\circ\text{C}$  for 24–45 h in air. The reaction was stopped, and it was mixed with water and ethyl acetate. The reaction mixture was extracted three times with ethyl acetate. The combined organic layer was dried over anhydrous magnesium sulfate, and filtered. The filtrate was evaporated under a vacuum, and the residue was purified by flash column chromatography on silica gel (eluting with petroleum ether-ethyl acetate) to provide the desired product **6**.

### 3. Procedure for the synthesis of product 7:

A mixture of **3a** (0.2 mmol), diphenyl diselenide **2a** (1.5 equiv) and PIFA (1 equiv.) in DCM (2

mL) was added in a 5 mL glass tube, which was stirred at room temperature for 0.5 h. When the reaction was completed, it was mixed with water and ethyl acetate. The reaction mixture was extracted three times with ethyl acetate. The combined organic layer was dried over anhydrous magnesium sulfate and filtered. The filtrate was evaporated under vacuum and the residue was purified by flash column chromatography on silica gel (eluting with petroleum ether-ethyl acetate) to provide the desired products **7**.

### Optimization of reaction conditions

**Table S1. Optimization of solvents and additives<sup>a</sup>**

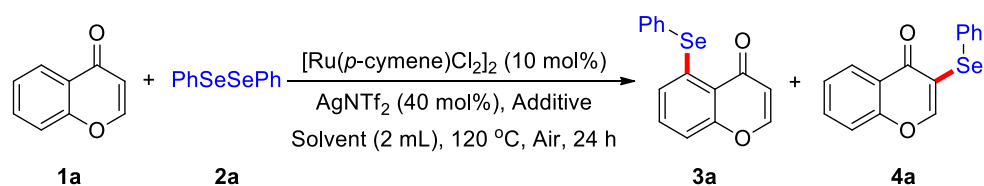

| Entry           | Solvent              | Additive                                                   | Yield (%) <sup>b</sup> |           |
|-----------------|----------------------|------------------------------------------------------------|------------------------|-----------|
|                 |                      |                                                            | <b>3a</b>              | <b>4a</b> |
| 1               | DMF                  | Cu(OAc) <sub>2</sub> (50 mol%) + CuCl (2 equiv)            | -                      | 75        |
| 2               | Toluene              | Cu(OAc) <sub>2</sub> (50 mol%) + CuCl (2 equiv)            | 25                     | -         |
| 3               | TFE                  | Cu(OAc) <sub>2</sub> (50 mol%) + CuCl (2 equiv)            | trace                  | 45        |
| 4               | 1,4-Dioxane          | Cu(OAc) <sub>2</sub> (50 mol%) + CuCl (2 equiv)            | trace                  | 34        |
| 5               | MeCN                 | Cu(OAc) <sub>2</sub> (50 mol%) + CuCl (2 equiv)            | -                      | -         |
| 6               | t-AmOH               | Cu(OAc) <sub>2</sub> (50 mol%) + CuCl (2 equiv)            | -                      | -         |
| 7               | DMSO                 | Cu(OAc) <sub>2</sub> (50 mol%) + CuCl (2 equiv)            | -                      | trace     |
| 8               | DCE                  | Cu(OAc) <sub>2</sub> (50 mol%) + CuCl (2 equiv)            | 66                     | -         |
| <b>9</b>        | <b>Chlorobenzene</b> | <b>Cu(OAc)<sub>2</sub> (50 mol%) + CuCl (2 equiv)</b>      | <b>70</b>              | -         |
| 10              | Chlorobenzene        | PivOH (50 mol%) + CuCl (2 equiv)                           | -                      | 50        |
| 11              | Chlorobenzene        | Ag <sub>2</sub> CO <sub>3</sub> (50 mol%) + CuCl (2 equiv) | trace                  | 6         |
| 12              | Chlorobenzene        | Cu(OTf) <sub>2</sub> (50 mol%) + CuCl (2 equiv)            | -                      | 60        |
| 13              | Chlorobenzene        | CuO (50 mol%) + CuCl (2 equiv)                             | -                      | 34        |
| 14              | Chlorobenzene        | KOAc (50 mol%) + CuCl (2 equiv)                            | trace                  | -         |
| 15              | Chlorobenzene        | Cu(OAc) <sub>2</sub> (50 mol%) + CuBr (2 equiv)            | 55                     | -         |
| 16              | Chlorobenzene        | -                                                          | -                      | trace     |
| 17              | Chlorobenzene        | Cu(OAc) <sub>2</sub> (50 mol%)                             | 63                     | -         |
| 18              | Chlorobenzene        | CuCl (2 equiv)                                             | -                      | 40        |
| 19 <sup>c</sup> | Chlorobenzene        | Cu(OAc) <sub>2</sub> (50 mol%) + CuCl (2 equiv)            | -                      | 47        |

<sup>a</sup>Reaction conditions: **1a** (0.2 mmol), **2a** (1.2 equiv), [Ru(*p*-cymene)Cl<sub>2</sub>]<sub>2</sub> (10 mol%), AgNTf<sub>2</sub> (40 mol%), additive in solvent (2 mL), at 120 °C in air. <sup>b</sup>Yield refers to isolated products after column chromatograph. <sup>c</sup>[Ru(*p*-cymene)Cl<sub>2</sub>]<sub>2</sub> was replaced with [Cp\*IrCl<sub>2</sub>]<sub>2</sub>.

**Table S2. Optimization of amounts of catalyst, additives and temperature<sup>a</sup>**

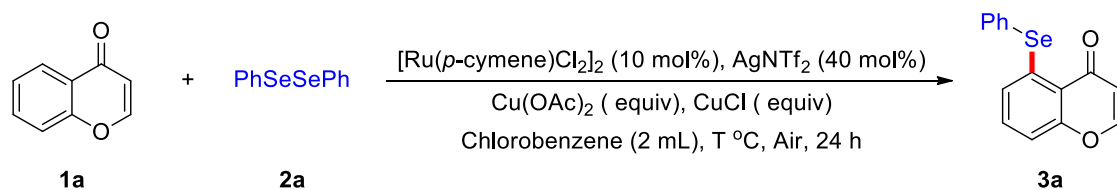

| Entry          | Amount of Cu(OAc) <sub>2</sub> (equiv) | Amount of CuCl (equiv) | T (°C)     | Yield (%) <sup>b</sup> |
|----------------|----------------------------------------|------------------------|------------|------------------------|
| <b>1</b>       | <b>0.5</b>                             | <b>2</b>               | <b>120</b> | <b>70</b>              |
| 2              | 1                                      | 2                      | 120        | 58                     |
| 3              | 0.5                                    | 1                      | 120        | 55                     |
| 4              | 0.5                                    | 3                      | 120        | 69                     |
| 5              | 0.5                                    | 2                      | 100        | 64                     |
| 6 <sup>c</sup> | 0.5                                    | 2                      | 120        | 60                     |
| 7 <sup>d</sup> | 0.5                                    | 2                      | 120        | 51                     |

<sup>a</sup>Reaction conditions: **1a** (0.2 mmol), **2a** (1.2 equiv), [Ru(*p*-cymene)Cl<sub>2</sub>]<sub>2</sub> (10 mol%), AgNTf<sub>2</sub> (40 mol%), Cu(OAc)<sub>2</sub> (mol%), CuCl (equiv), in chlorobenzene (2 mL) at T °C in air. <sup>b</sup>Yield refers to isolated products after column chromatography. <sup>c</sup>[Ru(*p*-cymene)Cl<sub>2</sub>]<sub>2</sub> (7.5 mol%) and AgNTf<sub>2</sub> (30 mol%) were used. <sup>d</sup>The reaction was performed in nitrogen.

## Study on reaction mechanism

### 1. Radical trapping experiments

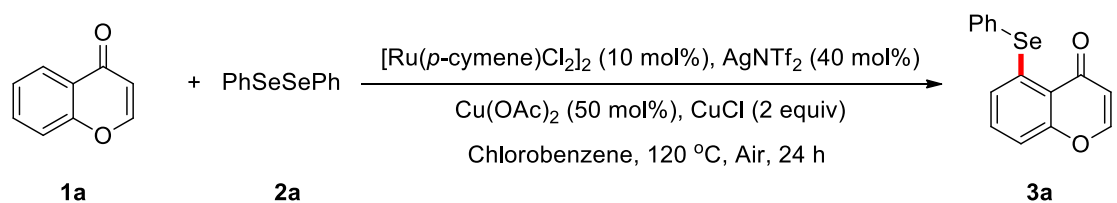

| Entry | Additive (4 equiv)   | Recovered <b>1a</b> | Yield of <b>3a</b> |                      |
|-------|----------------------|---------------------|--------------------|----------------------|
| 1     | -                    | 8%                  | 70%                |                      |
| 2     | TEMPO                | 92%                 | -                  |                      |
| 3     | BHT                  | 94%                 | -                  |                      |
| 4     | 1,1-diphenylethylene | 90%                 | -                  | <p><b>8, 60%</b></p> |

## 2. Deuterium labeling experiments

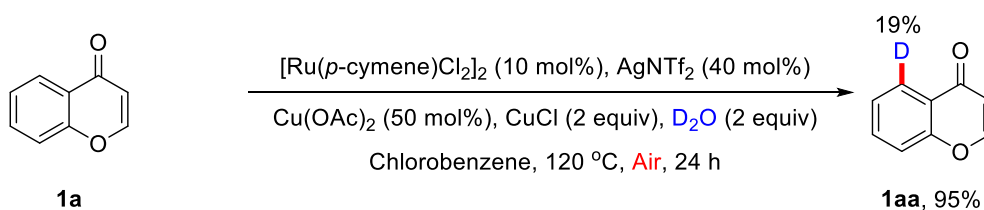

A mixture of chromone **1a** (0.2 mmol),  $[\text{Ru}(p\text{-cymene})\text{Cl}_2]_2$  (10 mol%),  $\text{AgNTf}_2$  (40 mol%),  $\text{Cu}(\text{OAc})_2$  (50 mol%),  $\text{CuCl}$  (2 equiv),  $\text{D}_2\text{O}$  (2 equiv.) and chlorobenzene (2 mL), was added in a 5 mL glass tube, which was stirred at 120 °C for 24 h in air. The reaction was stopped, and it was mixed with water and ethyl acetate. The reaction mixture was extracted three times with ethyl acetate. The combined organic layer was dried over anhydrous magnesium sulfate, and filtered. The filtrate was evaporated under a vacuum, and the residue was purified by flash column chromatography on silica gel (eluting with petroleum ether-ethyl acetate) to afford the recovered starting material **1aa** in 95% yield. The analysis by  $^1\text{H}$  NMR showed deuterium incorporation at the C5-position of **1aa**.

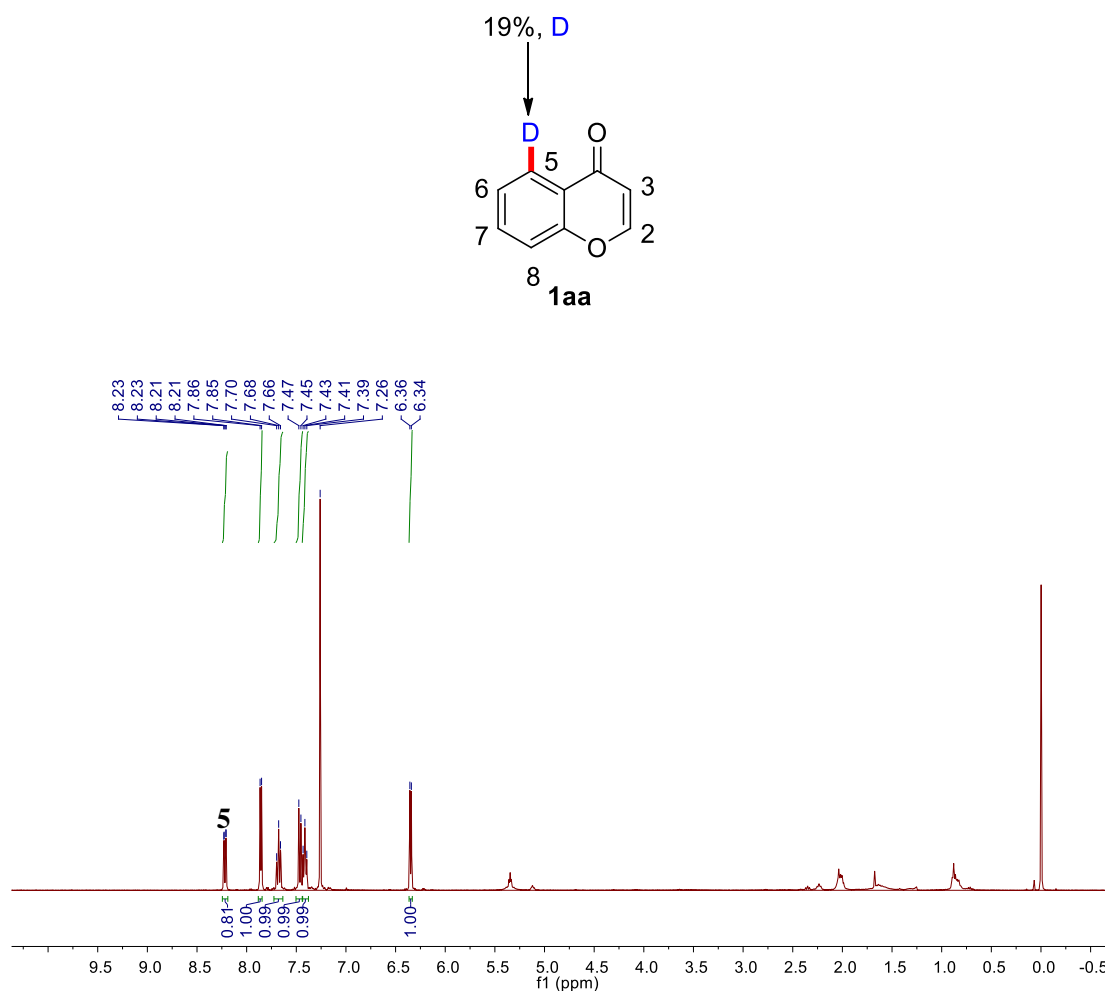

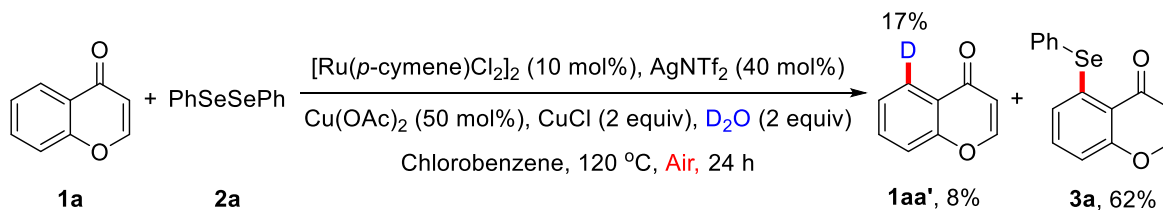

A mixture of chromone **1a** (0.2 mmol), diphenyl diselenide **2a** (1.2 equiv),  $[\text{Ru}(p\text{-cymene})\text{Cl}_2]_2$  (10 mol%),  $\text{AgNTf}_2$  (40 mol%),  $\text{Cu}(\text{OAc})_2$  (50 mol%),  $\text{CuCl}$  (2 equiv),  $\text{D}_2\text{O}$  (2 equiv.) and chlorobenzene (2 mL), was added in a 5 mL glass tube, which was stirred at 120 °C for 24 h in air. The reaction was stopped, and it was mixed with water and ethyl acetate. The reaction mixture was extracted three times with ethyl acetate. The combined organic layer was dried over anhydrous magnesium sulfate, and filtered. The filtrate was evaporated under a vacuum, and the residue was purified by flash column chromatography on silica gel (eluting with petroleum ether-ethyl acetate) to afford the recovered starting material **1aa'** and the product **3a** in 8% and 62% yields, respectively. The analysis by  $^1\text{H}$  NMR showed deuterium incorporation at the C5-position of **1aa'**. The analysis by  $^1\text{H}$  NMR showed no deuterium incorporation on the ring of **3a**.

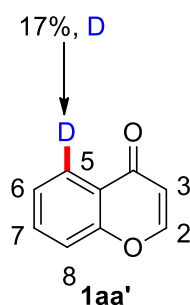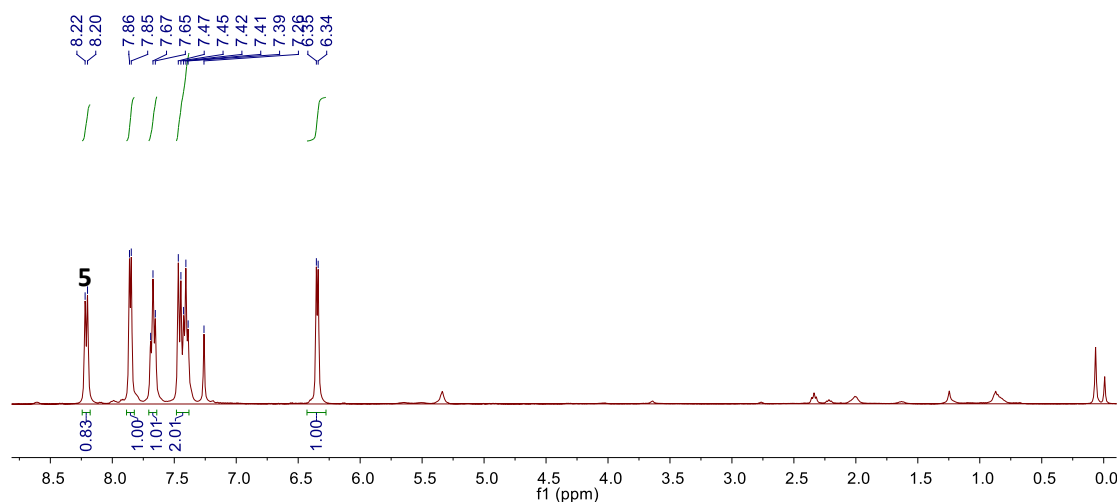

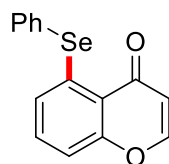

**3a**

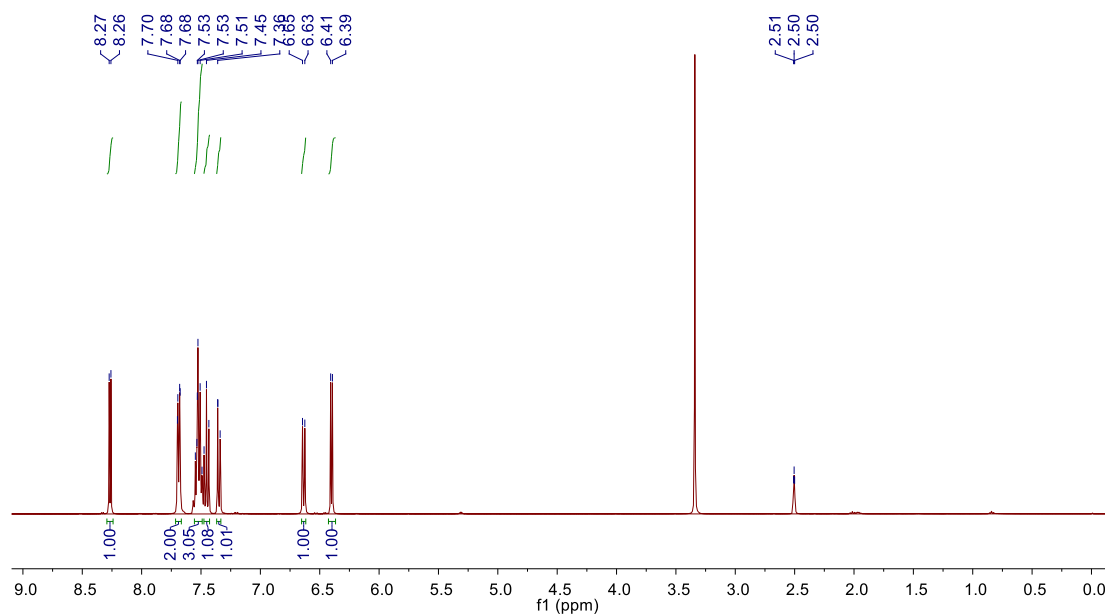

### 3. Kinetic isotope experiment:

#### (a) Parallel reaction

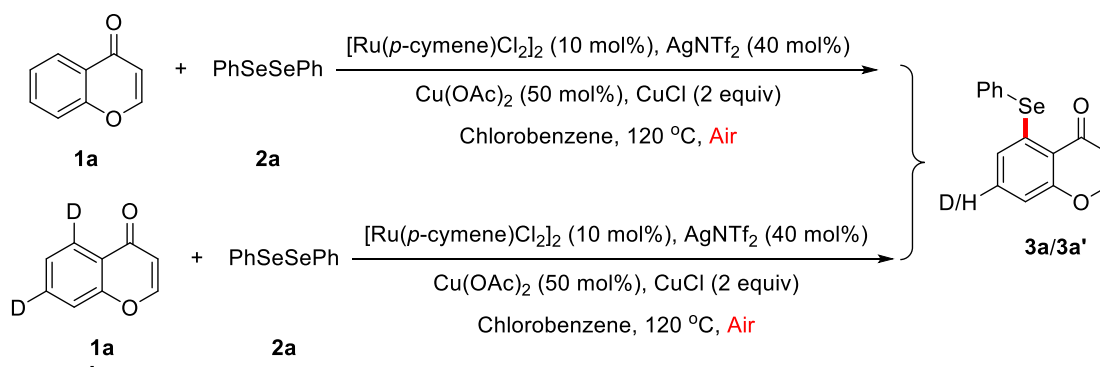

Diphenyl diselenide **2a** with chromone **1a** or chromone-*d*2 **1a'** respectively were performed to determine the KIE value. **1a** (0.2 mmol) or **1a'** (0.2 mmol), **2a** (0.24 mmol), [Ru(*p*-cymene)Cl<sub>2</sub>]<sub>2</sub> (10 mol%), AgNTf<sub>2</sub> (40 mol%), Cu(OAc)<sub>2</sub> (50 mol%), CuCl (2 equiv) and chlorobenzene (2 mL) were added in a 10 mL glass tube, which was stirred at 120 °C for 0.5 h, 1.5 h, 2.5 h, 3.5 h, 4.5 h **in air**, respectively. Then the reaction mass in two tubes was combined and was mixed with water and dichloromethane. The reaction mixture was extracted three times with dichloromethane. The



combined organic layer was washed two times with a little amount of water, dried over anhydrous magnesium sulfate and filtered. The filtrate was evaporated under vacuum and the residue was purified by flash column chromatography on silica gel (eluting with petroleum ether-ethyl acetate). The yields of **3a** and **3a'** were obtained by  $^1\text{H}$  NMR analysis of the mixture. The KIE was determined as  $k_{\text{H}}/k_{\text{D}} = 9.03$ .

|                |      |      |      |      |      |
|----------------|------|------|------|------|------|
| <b>t</b> [h]   | 0.5  | 1.5  | 2.5  | 3.5  | 4.5  |
| <b>3a</b> [%]  | 30.2 | 33.4 | 37.9 | 40.8 | 43.2 |
| <b>3a'</b> [%] | 2.6  | 3.7  | 4.3  | 4.0  | 4.3  |

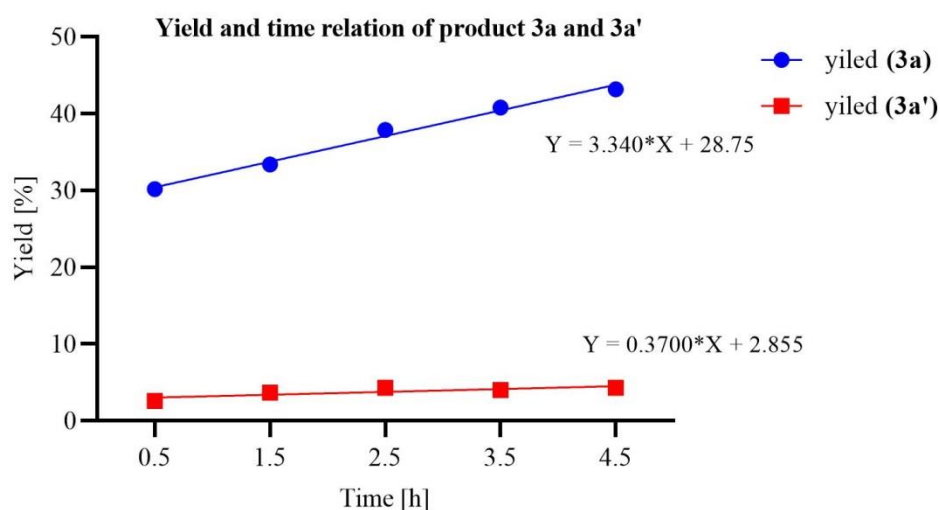

### (b) Competition reaction

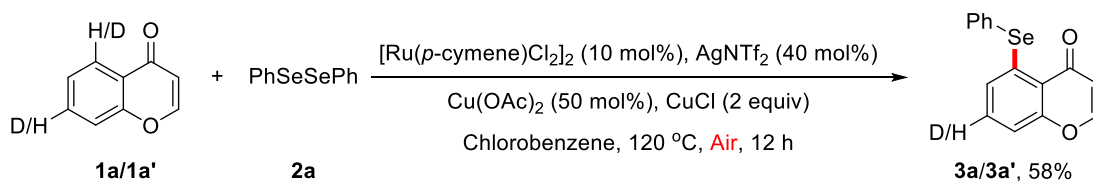

A mixture of chromone **1a** (0.2 mmol), chromone-*d*2 **1a'** (0.2 mmol), diphenyl diselenide **2a** (0.48 mmol),  $[\text{Ru}(p\text{-cymene})\text{Cl}_2]_2$  (10 mol%),  $\text{AgNTf}_2$  (40 mol%),  $\text{Cu}(\text{OAc})_2$  (50 mol%),  $\text{CuCl}$  (2 equiv) and chlorobenzene (4 mL), was added in a 10 mL glass tube, which was stirred at 120 °C for 12 h in air. The reaction was stopped, and it was mixed with water and ethyl acetate. The reaction mixture was extracted three times with ethyl acetate. The combined organic layer was dried over anhydrous magnesium sulfate, and filtered. The filtrate was evaporated under a vacuum, and the residue was purified by flash column chromatography on silica gel (eluting with petroleum ether-ethyl acetate). KIE ( $k_{\text{H}}/k_{\text{D}} = 9.00$ ) was determined from  $^1\text{H}$  NMR.

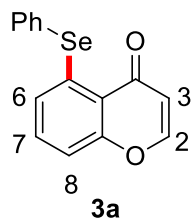

+

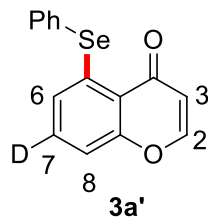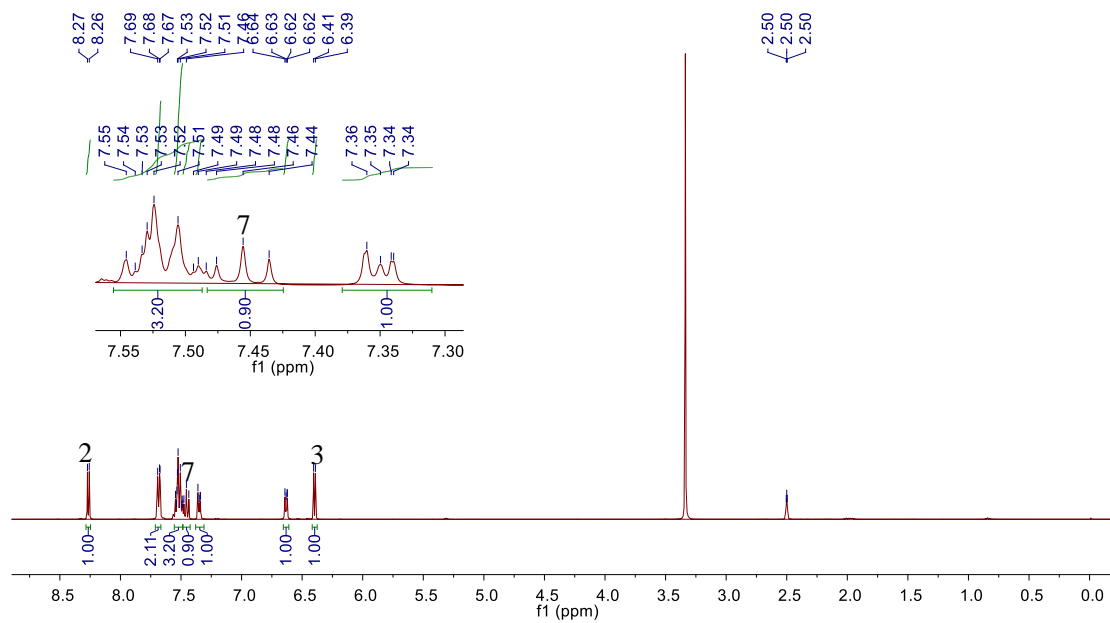

### X-ray structure of 3a

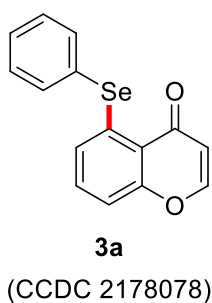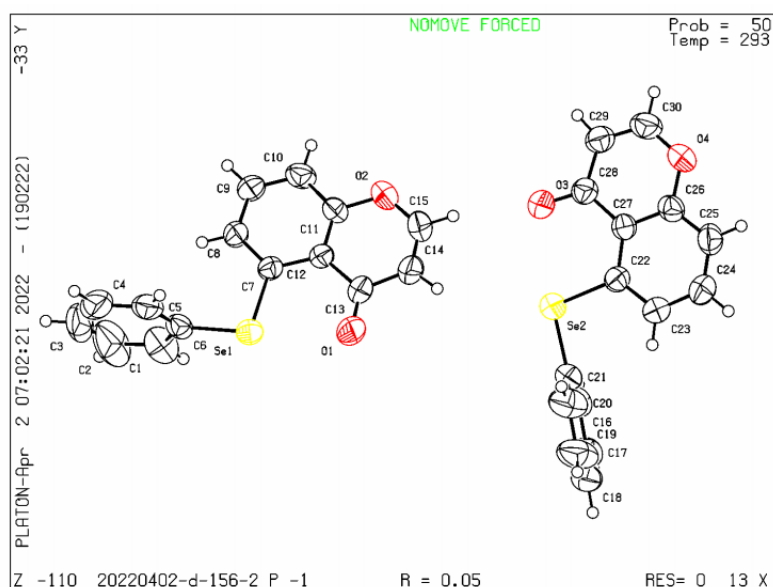

**Figure S1.** Single crystal structure of **3a**

**Table S3.** X-ray crystallographic data of **3a**

|                 |                                                   |                                                   |                 |
|-----------------|---------------------------------------------------|---------------------------------------------------|-----------------|
| Bond precision: | C-C = 0.0070 Å                                    | Wavelength=0.71073                                |                 |
| Cell:           | a=7.9033(5)                                       | b=11.9615(7)                                      | c=14.6472(9)    |
|                 | alpha=73.300(5)                                   | alpha=73.300(5)                                   | gamma=74.420(5) |
| Temperature:    | 293 K                                             |                                                   |                 |
|                 | Calculated                                        | Reported                                          |                 |
| Volume          | 1276.68(14)                                       | 1276.68(14)                                       |                 |
| Space group     | P -1                                              | P -1                                              |                 |
| Hall group      | -P 1                                              | -P 1                                              |                 |
| Moiety formula  | C <sub>15</sub> H <sub>10</sub> O <sub>2</sub> Se | C <sub>15</sub> H <sub>10</sub> O <sub>2</sub> Se |                 |
| Sum formula     | C <sub>15</sub> H <sub>10</sub> O <sub>2</sub> Se | C <sub>15</sub> H <sub>10</sub> O <sub>2</sub> Se |                 |

|            |             |             |
|------------|-------------|-------------|
| Mr         | 301.19      | 301.19      |
| Dx,g cm- 3 | 1.567       | 1.567       |
| Z          | 4           | 4           |
| Mu (mm-1)  | 2.931       | 2.931       |
| F000       | 600.0       | 600.0       |
| F000'      | 599.88      |             |
| h,k, lmax  | 10,16,20    | 10,16,19    |
| Nref       | 6819        | 5792        |
| Tmin, Tmax | 0.362,0.380 | 0.787,1.000 |
| Tmin'      | 0.335       |             |

Correction method= # Reported T Limits: Tmin=0.787 Tmax=1.000

AbsCorr = MULTI-SCAN

Data completeness= 0.849

Theta (max)= 29.059

R (reflections)= 0.0476( 3696)      wR2 (reflections)=0.1093( 5792)

S = 1.044

Npar= 325

### Information of preparation of single crystal **3a**:

**3a** (25 mg) with 1.2 mL *N,N*-dimethylformamide in a bottle and with 0.8 mL hexane on the upper layer of *N,N*-dimethylformamide. Subsequently, seal with sealing film. Place the bottle at room temperature to give the single crystal **3a** in 3 days.

### X-ray structure of **6h**

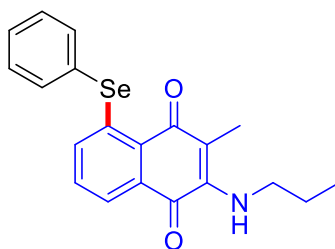

**6h**

(CCDC 2205235 )

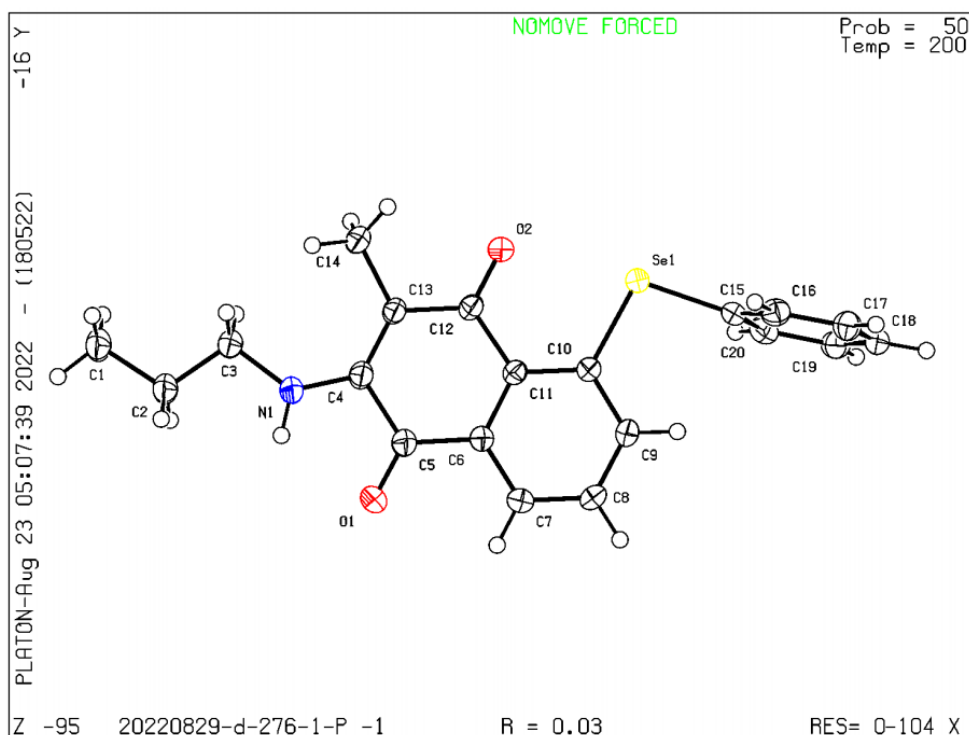

**Figure S2.** Single crystal structure of **6h**

**Table S4.** X-ray crystallographic data of **6h**

|                        |                                                     |                                                     |                 |
|------------------------|-----------------------------------------------------|-----------------------------------------------------|-----------------|
| Bond precision:        | C-C = 0.0030 Å                                      | Wavelength=0.71073                                  |                 |
| Cell:                  | a=8.0338(3)                                         | b=8.4987(4)                                         | c=13.3369(5)    |
|                        | alpha=74.087(4)                                     | alpha=74.630(3)                                     | gamma=81.377(4) |
| Temperature:           | 200 K                                               |                                                     |                 |
|                        | Calculated                                          | Reported                                            |                 |
| Volume                 | 841.45(6)                                           | 841.45(6)                                           |                 |
| Space group            | P -1                                                | P -1                                                |                 |
| Hall group             | -P 1                                                | -P 1                                                |                 |
| Moiety formula         | C <sub>20</sub> H <sub>19</sub> N O <sub>2</sub> Se | C <sub>20</sub> H <sub>19</sub> N O <sub>2</sub> Se |                 |
| Sum formula            | C <sub>20</sub> H <sub>19</sub> N O <sub>2</sub> Se | C <sub>20</sub> H <sub>19</sub> N O <sub>2</sub> Se |                 |
| Mr                     | 384.32                                              | 384.32                                              |                 |
| Dx,g cm <sup>-3</sup>  | 1.517                                               | 1.517                                               |                 |
| Z                      | 2                                                   | 2                                                   |                 |
| Mu (mm <sup>-1</sup> ) | 2.243                                               | 2.243                                               |                 |
| F000                   | 392.0                                               | 392.0                                               |                 |
| F000'                  | 391.96                                              |                                                     |                 |

|            |              |              |
|------------|--------------|--------------|
| h,k, lmax  | 10, 11, 18   | 10, 11, 18   |
| Nref       | 4508         | 3985         |
| Tmin, Tmax | 0.450, 0.488 | 0.962, 1.000 |
| Tmin'      | 0.442        |              |

Correction method= # Reported T Limits: Tmin=0.962 Tmax=1.000

AbsCorr = MULTI-SCAN

Data completeness= 0.884

Theta (max)= 29.101

R (reflections)= 0.0312( 3500)      wR2 (reflections)=0.0708( 3985)

S = 1.078      Npar= 219

---

**Information of preparation of single crystal 6h:**

**6h** (25mg) with 1.2 mL *N,N*-dimethylformamide in a bottle and with 0.8 mL hexane on the upper layer of *N,N*-dimethylformamide. Subsequently, seal with sealing film. Place the bottle at 4°C to give the single crystal **6h** in 3 days.

## Characterization of products 3, 6 and 7

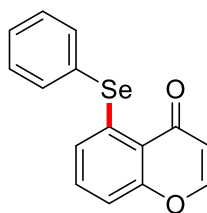

### 5-(Phenylselanyl)-4H-chromen-4-one (3a)

Faint Yellow solid; mp 107.1-108.2 °C;  $R_f = 0.3$  (20% EtOAc in petroleum ether);  $^1\text{H NMR}$  (600 MHz,  $\text{CDCl}_3$ )  $\delta$  7.80 (d,  $J = 4.9$  Hz, 1H), 7.74 (d,  $J = 7.2$  Hz, 2H), 7.50 – 7.44 (m, 3H), 7.28 – 7.25 (m, 1H), 7.17 – 7.16 (m, 1H), 6.75 (d,  $J = 7.9$  Hz, 1H), 6.37 (d,  $J = 5.3$  Hz, 1H) ppm;  $^{13}\text{C NMR}$  (151 MHz,  $\text{CDCl}_3$ )  $\delta$  178.82, 158.05, 154.44, 140.07, 137.55, 132.69, 129.83, 129.23, 128.92, 124.36, 122.50, 113.91, 112.88 ppm; HRMS: calc. for  $\text{C}_{15}\text{H}_{11}\text{O}_2\text{Se}^+$   $[\text{M}+\text{H}]^+$ : 302.9924, found: 302.9917.

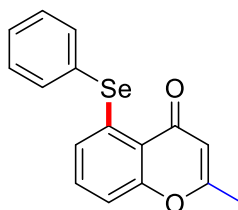

### 2-Methyl-5-(phenylselanyl)-4H-chromen-4-one (3b)

Faint Yellow solid; mp 142.2-142.7 °C;  $R_f = 0.3$  (20% EtOAc in petroleum ether);  $^1\text{H NMR}$  (400 MHz,  $\text{CDCl}_3$ )  $\delta$  7.73 – 7.71 (m, 2H), 7.48 – 7.40 (m, 3H), 7.22 (t,  $J = 8.1$  Hz, 1H), 7.10 (d,  $J = 8.2$  Hz, 1H), 6.69 (d,  $J = 7.9$  Hz, 1H), 6.17 (s, 1H), 2.35 (s, 3H) ppm;  $^{13}\text{C NMR}$  (101 MHz,  $\text{CDCl}_3$ )  $\delta$  179.46, 165.28, 158.00, 139.72, 137.61, 132.43, 129.79, 129.16, 129.13, 124.07, 121.22, 113.61, 110.44, 20.26 ppm; HRMS: calc. for  $\text{C}_{16}\text{H}_{13}\text{O}_2\text{Se}^+$   $[\text{M}+\text{H}]^+$ : 317.0081, found: 317.0074.

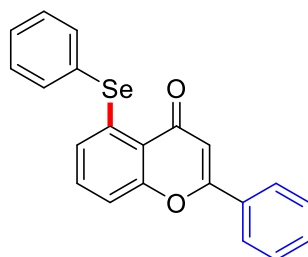

### 2-Phenyl-5-(phenylselanyl)-4H-chromen-4-one (3c)

Faint Yellow solid; mp 157.4-158.1 °C;  $R_f = 0.5$  (20% EtOAc in petroleum ether);  $^1\text{H NMR}$  (400 MHz,  $\text{CDCl}_3$ )  $\delta$  7.92 – 7.90 (m, 2H), 7.75 – 7.74 (m, 2H), 7.53 – 7.48 (m, 3H), 7.46 – 7.42 (m, 3H), 7.30 – 7.24 (m, 2H), 6.82 (s, 1H), 6.74 (dd,  $J = 6.6, 2.2$  Hz, 1H) ppm;  $^{13}\text{C NMR}$  (101 MHz,  $\text{CDCl}_3$ )  $\delta$  179.50, 162.40, 157.68, 139.84, 137.54, 132.65, 131.57, 131.28, 129.77, 129.15, 128.99,

128.95, 126.15, 124.23, 121.54, 113.77, 107.27 ppm; HRMS: calc.for C<sub>21</sub>H<sub>15</sub>O<sub>2</sub>Se<sup>+</sup> [M+H]<sup>+</sup>: 379.0237, found: 379.0231.

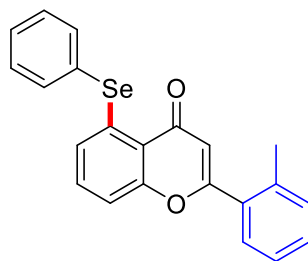

**5-(Phenylselanyl)-2-(o-tolyl)-4H-chromen-4-one (3d)**

Faint Yellow solid; mp 158.9-159.7 °C; R<sub>f</sub> = 0.3 (20% EtOAc in petroleum ether); <sup>1</sup>H NMR (400 MHz, CDCl<sub>3</sub>) δ 7.76 – 7.74 (m, 2H), 7.55 – 7.53 (m, 1H), 7.49 – 7.41 (m, 4H), 7.34 – 7.26 (m, 3H), 7.19 (d, *J* = 7.9 Hz, 1H), 6.76 (d, *J* = 7.8 Hz, 1H), 6.50 (s, 1H), 2.49 (s, 3H) ppm; <sup>13</sup>C NMR (101 MHz, CDCl<sub>3</sub>) δ 179.47, 165.16, 158.02, 140.03, 137.61, 136.81, 132.73, 132.25, 131.27, 130.77, 129.83, 129.21, 129.14, 129.07, 126.21, 124.33, 121.47, 113.78, 111.79, 20.55 ppm; HRMS: calc.for C<sub>22</sub>H<sub>17</sub>O<sub>2</sub>Se<sup>+</sup> [M+H]<sup>+</sup>: 393.0394, found: 393.0386.

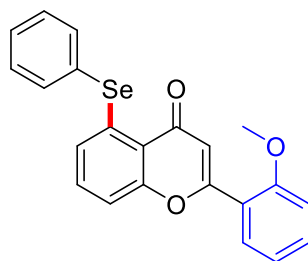

**2-(2-Methoxyphenyl)-5-(phenylselanyl)-4H-chromen-4-one (3e)**

Faint Yellow solid; mp 139.1-140.1 °C; R<sub>f</sub> = 0.3 (20% EtOAc in petroleum ether); <sup>1</sup>H NMR (400 MHz, CDCl<sub>3</sub>) δ 7.89 (dd, *J* = 7.8, 1.6 Hz, 1H), 7.75 (dd, *J* = 7.5, 1.5 Hz, 2H), 7.50 – 7.42 (m, 4H), 7.28 – 7.20 (m, 2H), 7.15 (s, 1H), 7.10 (t, *J* = 7.6 Hz, 1H), 7.04 (d, *J* = 8.4 Hz, 1H), 6.72 (dd, *J* = 7.5, 0.9 Hz, 1H), 3.94 (s, 3H) ppm; <sup>13</sup>C NMR (101 MHz, CDCl<sub>3</sub>) δ 180.02, 159.89, 158.06, 157.95, 139.69, 137.62, 132.50, 132.42, 129.77, 129.25, 129.14, 129.12, 123.94, 121.50, 120.69, 120.44, 113.75, 112.48, 111.74, 55.67 ppm; HRMS: calc.for C<sub>22</sub>H<sub>17</sub>O<sub>3</sub>Se<sup>+</sup> [M+H]<sup>+</sup>: 409.0343, found: 409.0336.

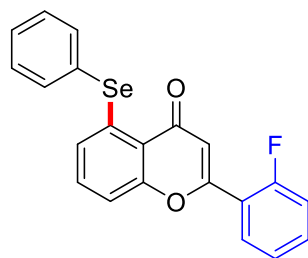

**2-(2-Fluorophenyl)-5-(phenylselanyl)-4H-chromen-4-one (3f)**



Yellow solid; mp 115.2-116.3 °C;  $R_f = 0.3$  (20% EtOAc in petroleum ether);  $^1\text{H NMR}$  (400 MHz,  $\text{CDCl}_3$ )  $\delta$  7.92 (td,  $J = 7.7, 1.7$  Hz, 1H), 7.74 (dd,  $J = 7.7, 1.6$  Hz, 2H), 7.54 – 7.42 (m, 4H), 7.34 – 7.20 (m, 4H), 6.94 (s, 1H), 6.75 (dd,  $J = 7.6, 1.1$  Hz, 1H) ppm;  $^{13}\text{C NMR}$  (101 MHz,  $\text{CDCl}_3$ )  $\delta$  179.50, 160.54 (d,  $J = 257.55$ ), 157.85, 157.82, 140.04, 137.59, 132.90 (d,  $J = 9.09$ ), 132.79, 129.82, 129.21, 128.99, 128.93, 124.59 (d,  $J = 3.6$  Hz), 124.32, 121.47, 119.94 (d,  $J = 10.0$  Hz), 116.93 (d,  $J = 23.23$  Hz), 113.73, 112.20 (d,  $J = 11.8$  Hz) ppm; HRMS: calc. for  $\text{C}_{21}\text{H}_{14}\text{FO}_2\text{Se}^+$   $[\text{M}+\text{H}]^+$ : 397.0143, found: 397.0136.

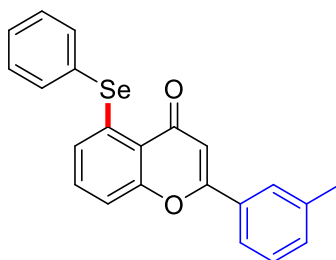

#### 5-(Phenylselanyl)-2-(m-tolyl)-4H-chromen-4-one (3g)

Faint Yellow solid; mp 135.2-136.1 °C;  $R_f = 0.3$  (20% EtOAc in petroleum ether);  $^1\text{H NMR}$  (400 MHz,  $\text{CDCl}_3$ )  $\delta$  7.76 – 7.71 (m, 4H), 7.48 – 7.41 (m, 4H), 7.35 (d,  $J = 7.5$  Hz, 1H), 7.27 (dd,  $J = 6.2, 3.0$  Hz, 2H), 6.81 (s, 1H), 6.74 (dd,  $J = 5.7, 3.2$  Hz, 1H), 2.46 (s, 3H) ppm;  $^{13}\text{C NMR}$  (101 MHz,  $\text{CDCl}_3$ )  $\delta$  179.60, 162.70, 157.78, 139.87, 138.82, 137.61, 132.65, 132.43, 131.32, 129.81, 129.19, 129.09, 128.90, 126.76, 124.25, 123.43, 121.64, 113.82, 107.31, 21.48 ppm; HRMS: calc. for  $\text{C}_{22}\text{H}_{17}\text{O}_2\text{Se}^+$   $[\text{M}+\text{H}]^+$ : 393.0394, found: 393.0386.

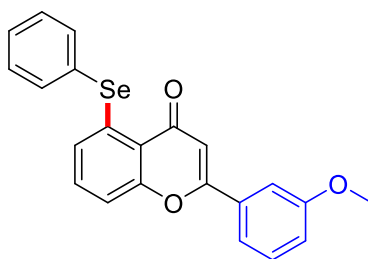

#### 2-(3-Methoxyphenyl)-5-(phenylselanyl)-4H-chromen-4-one (3h)

Faint Yellow solid; mp 130.4-131.2 °C;  $R_f = 0.3$  (20% EtOAc in petroleum ether);  $^1\text{H NMR}$  (400 MHz,  $\text{CDCl}_3$ )  $\delta$  7.75 (d,  $J = 7.4$  Hz, 2H), 7.52 – 7.42 (m, 6H), 7.32 – 7.26 (m, 2H), 7.09 (d,  $J = 8.0$  Hz, 1H), 6.82 (s, 1H), 6.75 (d,  $J = 6.5$  Hz, 1H), 3.91 (s, 3H) ppm;  $^{13}\text{C NMR}$  (101 MHz,  $\text{CDCl}_3$ )  $\delta$  179.60, 162.25, 159.90, 157.69, 139.85, 137.58, 132.73, 132.64, 130.09, 129.82, 129.21, 128.93, 124.27, 121.56, 118.63, 117.13, 113.83, 111.63, 107.55, 55.47 ppm; HRMS: calc. for  $\text{C}_{22}\text{H}_{17}\text{O}_3\text{Se}^+$   $[\text{M}+\text{H}]^+$ : 409.0343, found: 409.0336.

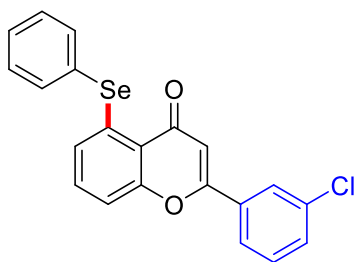

**2-(3-Chlorophenyl)-5-(phenylselanyl)-4H-chromen-4-one (3i)**

Faint Yellow solid; mp 105.3-106.7 °C;  $R_f = 0.3$  (20% EtOAc in petroleum ether);  $^1\text{H NMR}$  (400 MHz,  $\text{CDCl}_3$ )  $\delta$  7.91 (t,  $J = 1.6$  Hz, 1H), 7.79 – 7.77 (m, 1H), 7.74 (dd,  $J = 7.7, 1.5$  Hz, 2H), 7.52 – 7.42 (m, 5H), 7.32 – 7.25 (m, 2H), 6.80 (s, 1H), 6.75 (dd,  $J = 7.1, 1.7$  Hz, 1H) ppm;  $^{13}\text{C NMR}$  (101 MHz,  $\text{CDCl}_3$ )  $\delta$  179.35, 160.87, 157.69, 140.14, 137.59, 135.24, 133.18, 132.89, 131.53, 130.30, 129.86, 129.26, 128.90, 126.26, 124.50, 124.32, 121.58, 113.79, 107.95 ppm; HRMS: calc. for  $\text{C}_{21}\text{H}_{14}\text{ClO}_2\text{Se}^+$   $[\text{M}+\text{H}]^+$ : 412.9848, found: 412.9838.

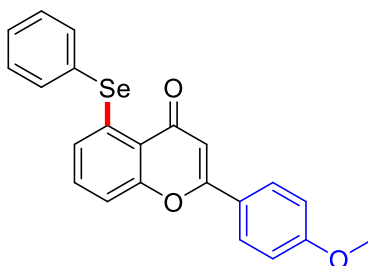

**2-(4-Methoxyphenyl)-5-(phenylselanyl)-4H-chromen-4-one (3j)**

Faint Yellow solid; mp 137.2-138.1 °C;  $R_f = 0.3$  (20% EtOAc in petroleum ether);  $^1\text{H NMR}$  (400 MHz,  $\text{CDCl}_3$ )  $\delta$  7.87 (d,  $J = 8.9$  Hz, 2H), 7.75 (dd,  $J = 7.6, 1.5$  Hz, 2H), 7.49 – 7.40 (m, 3H), 7.28 – 7.22 (m, 2H), 7.02 (d,  $J = 8.9$  Hz, 2H), 6.73 – 6.71 (m, 2H), 3.89 (s, 3H) ppm;  $^{13}\text{C NMR}$  (101 MHz,  $\text{CDCl}_3$ )  $\delta$  179.53, 162.50, 162.41, 157.66, 139.75, 137.62, 132.51, 129.79, 129.16, 127.94, 124.17, 123.61, 121.56, 114.43, 113.73, 105.94, 55.50 ppm; HRMS: calc. for  $\text{C}_{22}\text{H}_{17}\text{O}_3\text{Se}^+$   $[\text{M}+\text{H}]^+$ : 409.0343, found: 409.0336.

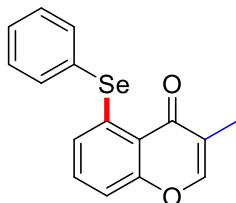

**3-Methyl-5-(phenylselanyl)-4H-chromen-4-one (3k)**

Faint Yellow solid; mp 161.3-162.2 °C;  $R_f = 0.3$  (10% EtOAc in petroleum ether);  $^1\text{H NMR}$  (400 MHz,  $\text{CDCl}_3$ )  $\delta$  7.73 (d,  $J = 4.3$  Hz, 3H), 7.47 – 7.41 (m, 3H), 7.22 (t,  $J = 8.1$  Hz, 1H), 7.11 (d,  $J = 8.2$  Hz, 1H), 6.71 (d,  $J = 7.8$  Hz, 1H), 2.05 (s, 3H) ppm;  $^{13}\text{C NMR}$  (101 MHz,  $\text{CDCl}_3$ )  $\delta$  179.59,

158.18, 150.94, 139.85, 137.58, 132.32, 129.79, 129.18, 129.12, 123.92, 121.24, 120.56, 113.82, 11.00 ppm; HRMS: calc. for  $C_{16}H_{13}O_2Se^+$   $[M+H]^+$ : 317.0081, found: 317.0075.

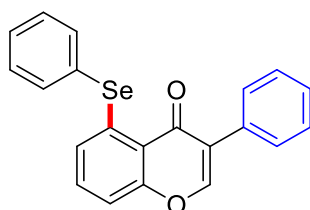

### 3-Phenyl-5-(phenylselanyl)-4H-chromen-4-one (3l)

Faint Yellow solid; mp 147.6-148.1 °C;  $R_f = 0.3$  (10% EtOAc in petroleum ether);  $^1H$  NMR (400 MHz,  $CDCl_3$ )  $\delta$  7.96 (s, 1H), 7.75 – 7.73 (m, 2H), 7.59 (d,  $J = 7.2$  Hz, 2H), 7.50 – 7.40 (m, 6H), 7.28 (t,  $J = 8.0$  Hz, 1H), 7.19 (d,  $J = 8.2$  Hz, 1H), 6.78 (d,  $J = 7.8$  Hz, 1H) ppm;  $^{13}C$  NMR (101 MHz,  $CDCl_3$ )  $\delta$  177.61, 157.85, 152.23, 140.82, 137.60, 132.61, 131.38, 129.85, 129.24, 128.99, 128.49, 128.27, 125.33, 124.47, 122.17, 113.83 ppm; HRMS: calc. for  $C_{21}H_{15}O_2Se^+$   $[M+H]^+$ : 379.0237, found: 379.0230.

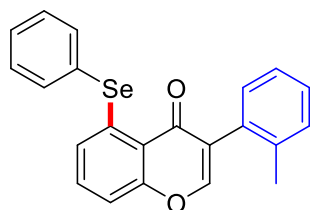

### 5-(Phenylselanyl)-3-(o-tolyl)-4H-chromen-4-one (3m)

Faint Yellow solid; mp 69.8-70.6 °C;  $R_f = 0.3$  (10% EtOAc in petroleum ether);  $^1H$  NMR (400 MHz,  $CDCl_3$ )  $\delta$  7.83 (s, 1H), 7.75 – 7.73 (m, 2H), 7.48 – 7.42 (m, 3H), 7.34 – 7.20 (m, 6H), 6.79 (d,  $J = 7.8$  Hz, 1H), 2.32 (s, 3H) ppm;  $^{13}C$  NMR (101 MHz,  $CDCl_3$ )  $\delta$  177.40, 158.03, 152.65, 140.79, 137.96, 137.57, 132.59, 131.04, 130.59, 130.21, 129.82, 129.24, 129.19, 128.68, 126.17, 125.78, 124.38, 121.98, 113.82, 20.15 ppm; HRMS: calc. for  $C_{22}H_{17}O_2Se^+$   $[M+H]^+$ : 393.0394, found: 393.0386.

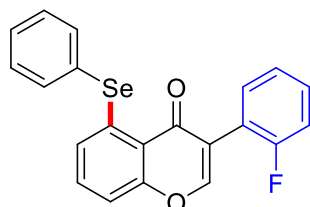

### 3-(2-Fluorophenyl)-5-(phenylselanyl)-4H-chromen-4-one (3n)

Faint Yellow solid; mp 134.7-135.2 °C;  $R_f = 0.3$  (10% EtOAc in petroleum ether);  $^1H$  NMR (400 MHz,  $CDCl_3$ )  $\delta$  7.99 (d,  $J = 1.0$  Hz, 1H), 7.74 (dd,  $J = 7.5, 1.4$  Hz, 2H), 7.55 (td,  $J = 7.5, 1.6$  Hz, 1H), 7.50 – 7.36 (m, 4H), 7.31 – 7.16 (m, 4H), 6.78 (d,  $J = 7.8$  Hz, 1H) ppm;  $^{13}C$  NMR (101 MHz,  $CDCl_3$ )  $\delta$  176.95, 160.20 (d,  $J = 248.26$  Hz), 158.97, 157.85, 153.79 (d,  $J = 3.0$  Hz), 140.86,

137.60, 132.73, 132.12 (d,  $J = 2.7$  Hz), 130.18 (d,  $J = 8.2$  Hz), 129.85, 129.25, 129.14, 124.58, 124.05 (d,  $J = 3.5$  Hz), 122.01, 119.90, 118.95 (d,  $J = 14.9$  Hz), 115.83 (d,  $J = 22.22$  Hz), 113.85 ppm; HRMS: calc. for  $C_{21}H_{14}FO_2Se^+$   $[M+H]^+$ : 397.0143, found: 397.0137.

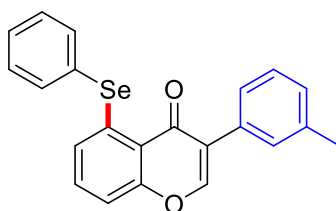

### 5-(Phenylselanyl)-3-(m-tolyl)-4H-chromen-4-one (3o)

Faint Yellow solid; mp 154.2-155.3 °C;  $R_f = 0.3$  (10% EtOAc in petroleum ether);  $^1H$  NMR (400 MHz,  $CDCl_3$ )  $\delta$  7.93 (s, 1H), 7.74 (dd,  $J = 7.5, 1.4$  Hz, 2H), 7.48 – 7.43 (m, 4H), 7.37 – 7.32 (m, 2H), 7.27 (t,  $J = 8.0$ , 1H), 7.21 (d,  $J = 6.6$  Hz, 1H), 7.18 (d,  $J = 8.2$  Hz, 1H), 6.77 (dd,  $J = 7.8, 0.5$  Hz, 1H), 2.42 (s, 3H) ppm;  $^{13}C$  NMR (101 MHz,  $CDCl_3$ )  $\delta$  177.64, 157.80, 152.19, 140.73, 138.07, 137.58, 132.54, 131.26, 129.82, 129.69, 129.26, 129.20, 129.05, 128.38, 125.99, 125.41, 124.39, 122.14, 113.80, 21.47 ppm; HRMS: calc. for  $C_{22}H_{17}O_2Se^+$   $[M+H]^+$ : 393.0394, found: 393.0386.

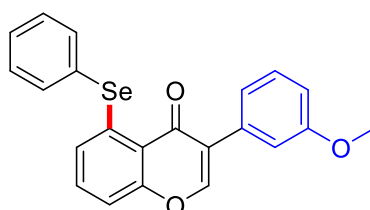

### 3-(3-Methoxyphenyl)-5-(phenylselanyl)-4H-chromen-4-one (3p)

Faint Yellow solid; mp 178.2-179.5 °C;  $R_f = 0.3$  (10% EtOAc in petroleum ether);  $^1H$  NMR (400 MHz,  $CDCl_3$ )  $\delta$  8.28 (dd,  $J = 8.0, 1.4$  Hz, 1H), 7.80 (s, 1H), 7.70 – 7.66 (m, 1H), 7.56 (d,  $J = 8.6$  Hz, 1H), 7.47 – 7.40 (m, 2H), 7.25 – 7.22 (m, 2H), 7.16 – 7.12 (m, 3H), 6.93 (d,  $J = 2.8$  Hz, 1H), 6.88 (dd,  $J = 8.6, 2.9$  Hz, 1H), 3.82 (s, 3H) ppm;  $^{13}C$  NMR (101 MHz,  $CDCl_3$ )  $\delta$  176.02, 159.77, 156.26, 153.56, 137.40, 136.98, 133.59, 133.40, 131.45, 129.06, 126.55, 126.47, 126.33, 125.18, 124.41, 122.69, 118.04, 116.93, 115.44, 55.40 ppm; HRMS: calc. for  $C_{22}H_{17}O_3Se^+$   $[M+H]^+$ : 409.0343, found: 409.0338.

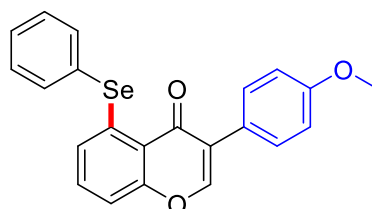

### 3-(4-Methoxyphenyl)-5-(phenylselanyl)-4H-chromen-4-one (3q)

Faint Yellow solid; mp 184.2-185.1 °C;  $R_f = 0.3$  (10% EtOAc in petroleum ether);  $^1\text{H NMR}$  (400 MHz,  $\text{CDCl}_3$ )  $\delta$  7.92 (s, 1H), 7.74 (d,  $J = 6.9$  Hz, 2H), 7.53 (d,  $J = 8.3$  Hz, 2H), 7.48 – 7.42 (m, 3H), 7.26 (t,  $J = 8.0$  Hz, 1H), 7.17 (d,  $J = 8.2$  Hz, 1H), 6.99 (d,  $J = 8.3$  Hz, 2H), 6.76 (d,  $J = 7.8$  Hz, 1H), 3.85 (s, 3H) ppm;  $^{13}\text{C NMR}$  (101 MHz,  $\text{CDCl}_3$ )  $\delta$  177.83, 159.66, 157.82, 151.68, 140.69, 137.59, 132.49, 130.15, 129.82, 129.30, 129.20, 124.89, 124.34, 123.65, 122.10, 113.98, 113.81, 55.32 ppm; HRMS: calc. for  $\text{C}_{22}\text{H}_{17}\text{O}_3\text{Se}^+$   $[\text{M}+\text{H}]^+$ : 409.0343, found: 409.0335.

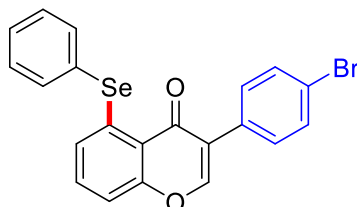

### 3-(4-Bromophenyl)-5-(phenylselanyl)-4H-chromen-4-one (3r)

Faint Yellow solid; mp 134.7-135.2 °C;  $R_f = 0.3$  (10% EtOAc in petroleum ether);  $^1\text{H NMR}$  (400 MHz,  $\text{CDCl}_3$ )  $\delta$  7.95 (s, 1H), 7.73 (d,  $J = 6.4$  Hz, 2H), 7.58 (d,  $J = 8.4$  Hz, 2H), 7.49 – 7.42 (m, 5H), 7.28 (t,  $J = 8.0$  Hz, 1H), 7.18 (d,  $J = 8.1$  Hz, 1H), 6.78 (d,  $J = 7.8$  Hz, 1H) ppm;  $^{13}\text{C NMR}$  (101 MHz,  $\text{CDCl}_3$ )  $\delta$  177.29, 157.84, 152.17, 140.90, 137.58, 132.76, 131.67, 130.54, 130.33, 129.89, 129.31, 129.09, 124.64, 124.29, 122.53, 122.04, 113.85 ppm; HRMS: calc. for  $\text{C}_{21}\text{H}_{14}\text{BrO}_2\text{Se}^+$   $[\text{M}+\text{H}]^+$ : 456.9342, found: 456.9333.

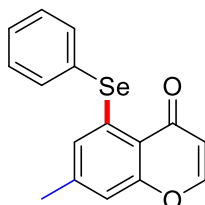

### 7-Methyl-5-(phenylselanyl)-4H-chromen-4-one (3s)

Faint Yellow solid; mp 140.2-141.3 °C;  $R_f = 0.3$  (20% EtOAc in petroleum ether);  $^1\text{H NMR}$  (400 MHz,  $\text{CDCl}_3$ )  $\delta$  7.73 – 7.71 (m, 3H), 7.47 – 7.41 (m, 3H), 6.94 (s, 1H), 6.52 (s, 1H), 6.30 (d,  $J = 5.9$  Hz, 1H), 2.19 (s, 3H) ppm;  $^{13}\text{C NMR}$  (101 MHz,  $\text{CDCl}_3$ )  $\delta$  178.57, 158.03, 154.16, 144.01, 139.58, 137.50, 129.75, 129.17, 128.95, 125.41, 120.38, 114.15, 112.77, 21.74 ppm; HRMS: calc. for  $\text{C}_{16}\text{H}_{13}\text{O}_2\text{Se}^+$   $[\text{M}+\text{H}]^+$ : 317.0081, found: 317.0075.

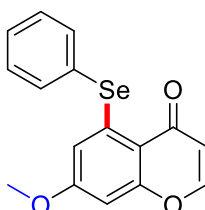

### 7-Methoxy-5-(phenylselanyl)-4H-chromen-4-one (3t)

Faint Yellow solid; mp 161.1-162.9 °C;  $R_f = 0.3$  (20% EtOAc in petroleum ether);  $^1\text{H NMR}$  (400 MHz,  $\text{CDCl}_3$ )  $\delta$  7.72 – 7.67 (m, 3H), 7.46 – 7.43 (m, 3H), 6.57 (s, 1H), 6.27 (d,  $J = 2.2$  Hz, 2H), 3.64 (s, 3H) ppm;  $^{13}\text{C NMR}$  (101 MHz,  $\text{CDCl}_3$ )  $\delta$  177.96, 162.91, 159.44, 153.92, 141.62, 137.55, 129.84, 129.33, 128.90, 116.83, 112.82, 112.76, 97.39, 55.39 ppm; HRMS: calc. for  $\text{C}_{16}\text{H}_{13}\text{O}_3\text{Se}^+$   $[\text{M}+\text{H}]^+$ : 333.0030, found: 333.0022.

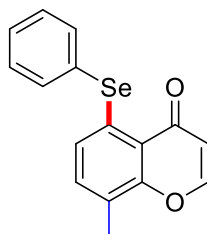

### 8-Methyl-5-(phenylselanyl)-4H-chromen-4-one (3u)

Faint Yellow solid; mp 98.2-99.1 °C;  $R_f = 0.3$  (20% EtOAc in petroleum ether);  $^1\text{H NMR}$  (400 MHz,  $\text{CDCl}_3$ )  $\delta$  7.83 (d,  $J = 5.9$  Hz, 1H), 7.72 – 7.70 (m, 2H), 7.47 – 7.39 (m, 3H), 7.10 (d,  $J = 8.0$  Hz, 1H), 6.61 (d,  $J = 8.0$  Hz, 1H), 6.34 (d,  $J = 5.9$  Hz, 1H), 2.32 (s, 3H) ppm;  $^{13}\text{C NMR}$  (101 MHz,  $\text{CDCl}_3$ )  $\delta$  179.07, 156.34, 154.29, 137.54, 136.37, 134.01, 129.72, 129.15, 129.06, 123.77, 123.08, 122.38, 112.67, 15.25 ppm; HRMS: calc. for  $\text{C}_{16}\text{H}_{13}\text{O}_2\text{Se}^+$   $[\text{M}+\text{H}]^+$ : 317.0081, found: 317.0074.

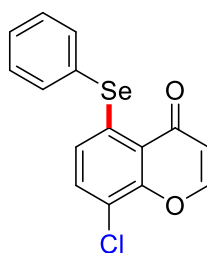

### 8-Chloro-5-(phenylselanyl)-4H-chromen-4-one (3v)

Faint Yellow solid; mp 102.1-103.1 °C;  $R_f = 0.3$  (20% EtOAc in petroleum ether);  $^1\text{H NMR}$  (400 MHz,  $\text{CDCl}_3$ )  $\delta$  7.87 (d,  $J = 5.9$  Hz, 1H), 7.70 (d,  $J = 6.9$  Hz, 2H), 7.50 – 7.42 (m, 3H), 7.31 (d,  $J = 8.6$  Hz, 1H), 6.66 (d,  $J = 8.6$  Hz, 1H), 6.41 (d,  $J = 5.9$  Hz, 1H) ppm;  $^{13}\text{C NMR}$  (101 MHz,  $\text{CDCl}_3$ )  $\delta$  178.22, 154.36, 153.38, 138.98, 137.50, 132.97, 129.98, 129.47, 128.53, 124.34, 123.47, 118.63, 113.15 ppm; HRMS: calc. for  $\text{C}_{15}\text{H}_{10}\text{ClO}_2\text{Se}^+$   $[\text{M}+\text{H}]^+$ : 336.9535, found: 336.9527.

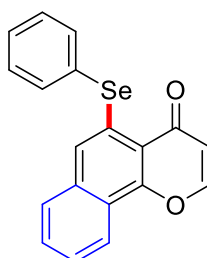

### 5-(Phenylselanyl)-4*H*-benzo[*h*]chromen-4-one (3w)

Faint Yellow solid; mp 137.4-138 °C;  $R_f = 0.3$  (20% EtOAc in petroleum ether);  $^1\text{H NMR}$  (400 MHz,  $\text{CDCl}_3$ )  $\delta$  8.33 (d,  $J = 7.7$  Hz, 1H), 8.00 (d,  $J = 5.8$  Hz, 1H), 7.79 – 7.78 (m, 2H), 7.56 – 7.41 (m, 6H), 7.02 (s, 1H), 6.54 (d,  $J = 5.8$  Hz, 1H) ppm;  $^{13}\text{C NMR}$  (101 MHz,  $\text{CDCl}_3$ )  $\delta$  178.66, 155.22, 153.83, 137.71, 135.30, 133.01, 129.85, 129.73, 129.35, 129.21, 126.83, 125.94, 123.07, 122.30, 121.61, 120.00, 114.39 ppm; HRMS: calc. for  $\text{C}_{19}\text{H}_{13}\text{O}_2\text{Se}^+$   $[\text{M}+\text{H}]^+$ : 353.0081, found: 353.0074.

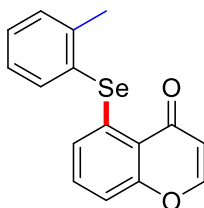

### 5-(*O*-Tolylselanyl)-4*H*-chromen-4-one (3x)

Faint Yellow solid; mp 109.3-110.4 °C;  $R_f = 0.3$  (20% EtOAc in petroleum ether);  $^1\text{H NMR}$  (400 MHz,  $\text{CDCl}_3$ )  $\delta$  7.78 (d,  $J = 5.9$  Hz, 1H), 7.75 (d,  $J = 7.5$  Hz, 1H), 7.40 – 7.38 (m, 2H), 7.25 – 7.21 (m, 2H), 7.14 (dd,  $J = 8.2, 0.7$  Hz, 1H), 6.59 (d,  $J = 7.8$  Hz, 1H), 6.36 (d,  $J = 5.9$  Hz, 1H), 2.44 (s, 3H) ppm;  $^{13}\text{C NMR}$  (101 MHz,  $\text{CDCl}_3$ )  $\delta$  178.83, 158.19, 154.39, 143.76, 139.18, 138.71, 132.80, 130.45, 130.06, 129.67, 127.24, 123.71, 122.69, 113.90, 112.99, 22.54 ppm; HRMS: calc. for  $\text{C}_{16}\text{H}_{13}\text{O}_2\text{Se}^+$   $[\text{M}+\text{H}]^+$ : 317.0081, found: 317.0075.

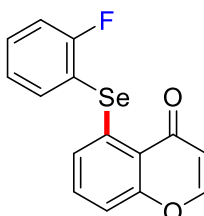

### 5-((2-Fluorophenyl)selanyl)-4*H*-chromen-4-one (3y)

Faint Yellow solid; mp 113.2-114.9 °C;  $R_f = 0.3$  (20% EtOAc in petroleum ether);  $^1\text{H NMR}$  (400 MHz,  $\text{CDCl}_3$ )  $\delta$  7.78 (d,  $J = 5.8$  Hz, 1H), 7.73 (t,  $J = 6.7$  Hz, 1H), 7.49 (dd,  $J = 12.7, 6.5$  Hz, 1H), 7.28 (t,  $J = 8.0$  Hz, 1H), 7.23 – 7.16 (m, 3H), 6.70 (d,  $J = 7.7$  Hz, 1H), 6.36 (d,  $J = 5.8$  Hz, 1H) ppm;  $^{13}\text{C NMR}$  (101 MHz,  $\text{CDCl}_3$ )  $\delta$  178.76, 163.61 (d,  $J = 246.3$  Hz), 158.04, 154.64, 139.34 (d,  $J = 1.8$  Hz), 138.09, 132.89, 132.12 (d,  $J = 7.8$  Hz), 125.42 (d,  $J = 3.6$  Hz), 124.08, 122.64, 116.01 (d,  $J = 24.3$  Hz), 113.50 (d,  $J = 148.0$  Hz) ppm; HRMS: calc. for  $\text{C}_{15}\text{H}_{10}\text{FO}_2\text{Se}^+$   $[\text{M}+\text{H}]^+$ : 320.9830, found: 320.9823.

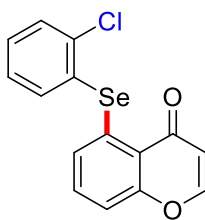

**5-((2-Chlorophenyl)selanyl)-4H-chromen-4-one (3z)**

Faint Yellow solid; mp 147.2-148.1 °C;  $R_f = 0.3$  (20% EtOAc in petroleum ether);  $^1\text{H NMR}$  (400 MHz,  $\text{CDCl}_3$ )  $\delta$  7.86 (dd,  $J = 7.6, 1.6$  Hz, 1H), 7.79 (d,  $J = 5.9$  Hz, 1H), 7.59 (dd,  $J = 8.0, 1.2$  Hz, 1H), 7.43 (td,  $J = 7.7, 1.6$  Hz, 1H), 7.32 – 7.27 (m, 2H), 7.18 (dd,  $J = 8.3, 0.8$  Hz, 1H), 6.62 (dd,  $J = 7.9, 0.6$  Hz, 1H), 6.37 (d,  $J = 5.9$  Hz, 1H) ppm;  $^{13}\text{C NMR}$  (101 MHz,  $\text{CDCl}_3$ )  $\delta$  178.83, 158.07, 154.61, 141.11, 139.77, 138.16, 132.93, 131.21, 130.10, 129.47, 127.89, 123.95, 122.53, 114.20, 112.82 ppm; HRMS: calc. for  $\text{C}_{15}\text{H}_{10}\text{ClO}_2\text{Se}^+ [\text{M}+\text{H}]^+$ : 336.9535, found: 336.9527.

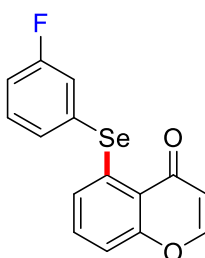

**5-((3-Fluorophenyl)selanyl)-4H-chromen-4-one (3aa)**

Faint Yellow solid; mp 118.3-119.5 °C;  $R_f = 0.3$  (20% EtOAc in petroleum ether);  $^1\text{H NMR}$  (400 MHz,  $\text{CDCl}_3$ )  $\delta$  7.78 (d,  $J = 5.9$  Hz, 1H), 7.50 (d,  $J = 7.5$  Hz, 1H), 7.45 – 7.38 (m, 2H), 7.28 (t,  $J = 8.0$ , 1H), 7.17 – 7.13 (m, 2H), 6.72 (d,  $J = 7.9$  Hz, 1H), 6.35 (d,  $J = 5.9$  Hz, 1H) ppm;  $^{13}\text{C NMR}$  (101 MHz,  $\text{CDCl}_3$ )  $\delta$  178.76, 162.94 (d,  $J = 250.8$  Hz), 158.02, 154.57, 139.33, 133.19 (d,  $J = 3.0$  Hz), 132.85, 131.17 (d,  $J = 7.7$  Hz), 130.62 (d,  $J = 6.0$  Hz), 124.25, 124.18 (d,  $J = 21.21$  Hz), 122.46, 116.45 (d,  $J = 21.0$  Hz), 114.20, 112.80 ppm; HRMS: calc. for  $\text{C}_{15}\text{H}_{10}\text{FO}_2\text{Se}^+ [\text{M}+\text{H}]^+$ : 320.9830, found: 320.9823.

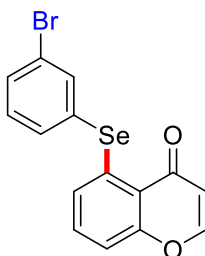

**5-((3-Bromophenyl)selanyl)-4H-chromen-4-one (3ab)**

Faint Yellow solid; mp 133.1-134.2 °C;  $R_f = 0.3$  (20% EtOAc in petroleum ether);  $^1\text{H NMR}$  (400 MHz,  $\text{CDCl}_3$ )  $\delta$  7.88 (s, 1H), 7.79 (d,  $J = 5.9$  Hz, 1H), 7.65 (d,  $J = 7.6$  Hz, 1H), 7.60 (d,  $J = 8.1$  Hz, 1H), 7.33 – 7.28 (m, 2H), 7.17 (d,  $J = 8.2$  Hz, 1H), 6.71 (d,  $J = 7.8$  Hz, 1H), 6.35 (d,  $J = 5.9$  Hz,



1H) ppm;  $^{13}\text{C}$  NMR (101 MHz,  $\text{CDCl}_3$ )  $\delta$  178.75, 158.02, 154.59, 139.89, 139.29, 136.06, 132.91, 132.38, 131.25, 131.01, 124.32, 123.36, 122.45, 114.24, 112.82 ppm; HRMS: calc. for  $\text{C}_{15}\text{H}_{10}\text{BrO}_2\text{Se}^+$   $[\text{M}+\text{H}]^+$ : 380.9029, found: 380.9019.

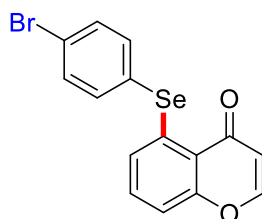

#### 5-((4-Bromophenyl)selanyl)-4H-chromen-4-one (3ac)

Faint Yellow solid; mp 188.1-189.1 °C;  $R_f$  = 0.3 (20% EtOAc in petroleum ether);  $^1\text{H}$  NMR (400 MHz,  $\text{CDCl}_3$ )  $\delta$  7.78 (d,  $J$  = 5.9 Hz, 1H), 7.59 – 7.54 (m, 4H), 7.28 (t,  $J$  = 8.0 Hz, 1H), 7.17 (d,  $J$  = 8.2 Hz, 1H), 6.70 (d,  $J$  = 7.8 Hz, 1H), 6.35 (d,  $J$  = 5.9 Hz, 1H) ppm;  $^{13}\text{C}$  NMR (101 MHz,  $\text{CDCl}_3$ )  $\delta$  178.75, 158.03, 154.56, 139.43, 139.18, 133.07, 132.82, 127.87, 124.24, 124.09, 122.49, 114.18, 112.84 ppm; HRMS: calc. for  $\text{C}_{15}\text{H}_{10}\text{BrO}_2\text{Se}^+$   $[\text{M}+\text{H}]^+$ : 380.9029, found: 380.9020.

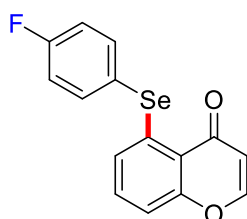

#### 5-((4-Fluorophenyl)selanyl)-4H-chromen-4-one (3ad)

Faint Yellow solid; mp 153.1-154.4 °C;  $R_f$  = 0.3 (20% EtOAc in petroleum ether);  $^1\text{H}$  NMR (400 MHz,  $\text{CDCl}_3$ )  $\delta$  7.78 (d,  $J$  = 5.9 Hz, 1H), 7.70 – 7.66 (m, 2H), 7.27 (t,  $J$  = 8.0 Hz, 1H), 7.17 – 7.11 (m, 3H), 6.68 (d,  $J$  = 7.9 Hz, 1H), 6.35 (d,  $J$  = 5.9 Hz, 1H) ppm;  $^{13}\text{C}$  NMR (101 MHz,  $\text{CDCl}_3$ )  $\delta$  178.81, 163.58 (d,  $J$  = 249.7 Hz), 158.07, 154.52, 140.00, 139.64 (d,  $J$  = 8.1 Hz), 132.77, 124.16, 123.92 (d,  $J$  = 3.5 Hz), 122.51, 117.16 (d,  $J$  = 21.3 Hz), 114.08, 112.87 ppm; HRMS: calc. for  $\text{C}_{15}\text{H}_{10}\text{FO}_2\text{Se}^+$   $[\text{M}+\text{H}]^+$ : 320.9830, found: 320.9823.

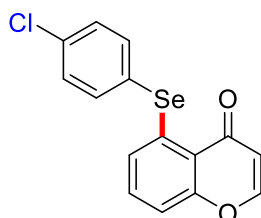

#### 5-((4-Chlorophenyl)selanyl)-4H-chromen-4-one (3ae)

Faint Yellow solid; mp 127.1-128.3 °C;  $R_f$  = 0.3 (20% EtOAc in petroleum ether);  $^1\text{H}$  NMR (400 MHz,  $\text{CDCl}_3$ )  $\delta$  7.79 (d,  $J$  = 5.9 Hz, 1H), 7.65 – 7.63 (m, 2H), 7.42 – 7.40 (m, 2H), 7.28 (t,  $J$  = 11.2, 4.9 Hz, 1H), 7.17 (dd,  $J$  = 8.3, 0.8 Hz, 1H), 6.70 (dd,  $J$  = 7.9, 0.6 Hz, 1H), 6.36 (d,  $J$  = 5.9

Hz, 1H) ppm;  $^{13}\text{C}$  NMR (101 MHz,  $\text{CDCl}_3$ )  $\delta$  178.76, 158.05, 154.55, 139.57, 138.93, 135.76, 132.81, 130.13, 127.23, 124.22, 122.50, 114.17, 112.85 ppm; HRMS: calc. for  $\text{C}_{15}\text{H}_{10}\text{ClO}_2\text{Se}^+$   $[\text{M}+\text{H}]^+$ : 336.9535, found: 336.9527.

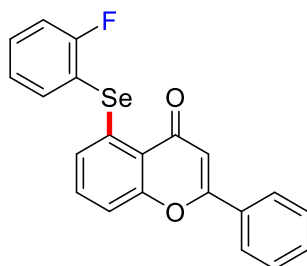

### 5-((2-Fluorophenyl)selenanyl)-2-phenyl-4H-chromen-4-one (3af)

Faint Yellow solid; mp 140.1-141.2 °C;  $R_f$  = 0.3 (20% EtOAc in petroleum ether);  $^1\text{H}$  NMR (400 MHz,  $\text{CDCl}_3$ )  $\delta$  7.92 (d,  $J$  = 6.4 Hz, 2H), 7.76 (t,  $J$  = 6.7 Hz, 1H), 7.54 – 7.47 (m, 4H), 7.34 – 7.28 (m, 2H), 7.22 (t,  $J$  = 7.7 Hz, 2H), 6.83 (s, 1H), 6.72 (d,  $J$  = 6.7 Hz, 1H) ppm;  $^{13}\text{C}$  NMR (101 MHz,  $\text{CDCl}_3$ )  $\delta$  179.55, 163.65 (d,  $J$  = 246.44 Hz), 162.73, 157.74, 139.39 (d,  $J$  = 2.0 Hz), 137.93, 132.90, 132.07 (d,  $J$  = 7.8 Hz), 131.68, 131.31, 129.02, 126.23, 125.40 (d,  $J$  = 3.7 Hz), 124.01, 121.78, 116.11 (d,  $J$  = 24.24 Hz), 116.01 (d,  $J$  = 24.24 Hz), 114.12, 107.22 ppm; HRMS: calc. for  $\text{C}_{21}\text{H}_{14}\text{FO}_2\text{Se}^+$   $[\text{M}+\text{H}]^+$ : 397.0143, found: 397.0139.

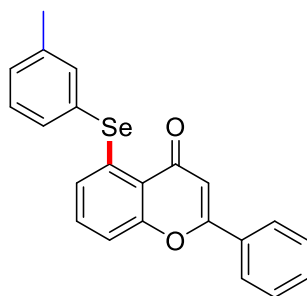

### 2-Phenyl-5-(*m*-tolylselenanyl)-4H-chromen-4-one (3ag)

Faint Yellow solid; mp 136.1-137.2 °C;  $R_f$  = 0.3 (20% EtOAc in petroleum ether);  $^1\text{H}$  NMR (400 MHz,  $\text{CDCl}_3$ )  $\delta$  7.94 – 7.92 (m, 2H), 7.59 (s, 1H), 7.56 – 7.53 (m, 4H), 7.35 (t,  $J$  = 7.5 Hz, 1H), 7.29 (d,  $J$  = 7.5 Hz, 3H), 6.83 (s, 1H), 6.78 (d,  $J$  = 6.3 Hz, 1H), 2.41 (s, 3H) ppm;  $^{13}\text{C}$  NMR (101 MHz,  $\text{CDCl}_3$ )  $\delta$  179.56, 162.43, 157.75, 140.09, 139.65, 138.10, 134.54, 132.68, 131.60, 131.39, 129.99, 129.60, 129.00, 128.76, 126.21, 124.36, 121.61, 113.72, 107.37, 21.29 ppm; HRMS: calc. for  $\text{C}_{22}\text{H}_{17}\text{O}_2\text{Se}^+$   $[\text{M}+\text{H}]^+$ : 393.0394, found: 393.0386.

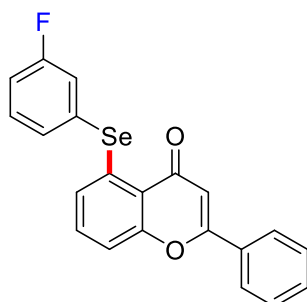

### 5-((3-Fluorophenyl)selanyl)-2-phenyl-4*H*-chromen-4-one (3ah)

Faint Yellow solid; mp 131.2-132.1 °C;  $R_f = 0.3$  (20% EtOAc in petroleum ether);  $^1\text{H NMR}$  (400 MHz,  $\text{CDCl}_3$ )  $\delta$  7.92 (d,  $J = 6.1$  Hz, 2H), 7.53 (d,  $J = 6.6$  Hz, 4H), 7.54 – 7.40 (m, 2H), 7.34 – 7.28 (m, 2H), 7.17 (t,  $J = 7.8$  Hz, 1H), 6.83 (s, 1H), 6.74 (d,  $J = 6.7$  Hz, 1H) ppm;  $^{13}\text{C NMR}$  (101 MHz,  $\text{CDCl}_3$ )  $\delta$  179.58, 162.96 (d,  $J = 252.5$  Hz), 162.70, 157.74, 139.18, 133.24 (d,  $J = 2.9$  Hz), 132.88, 131.71, 131.30, 131.15 (d,  $J = 7.8$  Hz), 130.74 (d,  $J = 6.0$  Hz), 129.04, 126.25, 124.24 (d,  $J = 20.2$  Hz), 124.20, 121.59, 116.43 (d,  $J = 21.0$  Hz), 114.10, 107.28 ppm; HRMS: calc. for  $\text{C}_{21}\text{H}_{14}\text{FO}_2\text{Se}^+$   $[\text{M}+\text{H}]^+$ : 397.0143, found: 397.0137.

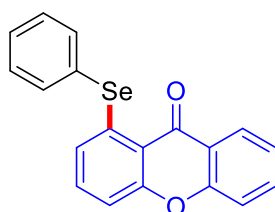

### 1-(Phenylselanyl)-9*H*-xanthen-9-one (6a)

Yellow solid; mp 156.5-157.3 °C;  $R_f = 0.3$  (4% EtOAc in petroleum ether);  $^1\text{H NMR}$  (400 MHz,  $\text{CDCl}_3$ )  $\delta$  8.34 (dd,  $J = 8.0, 1.6$  Hz, 1H), 7.76 (dd,  $J = 7.6, 1.5$  Hz, 2H), 7.73 – 7.69 (m, 1H), 7.51 – 7.43 (m, 4H), 7.39 – 7.35 (m, 1H), 7.30 (t,  $J = 8.1$  Hz, 1H), 7.19 (dd,  $J = 8.2, 0.5$  Hz, 1H), 6.73 (dd,  $J = 7.8, 0.5$  Hz, 1H) ppm;  $^{13}\text{C NMR}$  (101 MHz,  $\text{CDCl}_3$ )  $\delta$  178.13, 157.78, 155.39, 141.53, 137.60, 134.82, 133.56, 129.82, 129.26, 129.07, 126.74, 124.00, 123.28, 121.59, 119.49, 117.53, 113.76 ppm; HRMS: calc. for  $\text{C}_{19}\text{H}_{13}\text{O}_2\text{Se}^+$   $[\text{M}+\text{H}]^+$ : 353.0081, found: 353.0074.

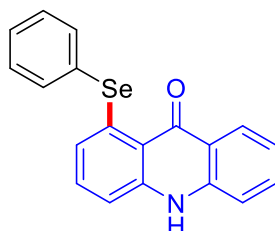

### 1-(Phenylselanyl)acridin-9(10*H*)-one (6b)

Yellow solid; mp 139.1-140.5 °C;  $R_f = 0.3$  (50% DCM in petroleum ether);  $^1\text{H NMR}$  (400 MHz, DMSO)  $\delta$  11.78 (brs, 1H), 8.21 (d,  $J = 7.7$  Hz, 1H), 7.75 – 7.69 (m, 3H), 7.53 – 7.47 (m, 4H), 7.36 (t,  $J = 8.0$  Hz, 1H), 7.29 – 7.24 (m, 2H), 6.43 (d,  $J = 7.6$  Hz, 1H) ppm;  $^{13}\text{C NMR}$  (101 MHz, DMSO)  $\delta$  177.84, 142.77, 140.27, 139.74, 137.26, 133.69, 132.70, 130.01, 129.69, 129.22, 125.97, 121.33, 120.32, 119.51, 118.22, 117.03, 113.35 ppm; HRMS: calc. for  $\text{C}_{19}\text{H}_{14}\text{NOSe}^+$   $[\text{M}+\text{H}]^+$ : 352.0241, found: 352.0234.

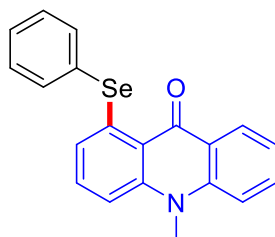

**10-Methyl-1-(phenylselanyl)acridin-9(10H)-one (6c)**

Yellow solid; mp 190.1-191.1 °C;  $R_f = 0.3$  (50% DCM in petroleum ether);  $^1\text{H NMR}$  (400 MHz,  $\text{CDCl}_3$ )  $\delta$  8.55 (dd,  $J = 8.0, 1.3$  Hz, 1H), 7.77 (dd,  $J = 7.3, 1.7$  Hz, 2H), 7.73 – 7.69 (m, 1H), 7.50 – 7.42 (m, 4H), 7.32 – 7.27 (m, 2H), 7.20 (d,  $J = 8.5$  Hz, 1H), 6.69 (d,  $J = 7.7$  Hz, 1H), 3.85 (s, 3H) ppm;  $^{13}\text{C NMR}$  (101 MHz,  $\text{CDCl}_3$ )  $\delta$  178.92, 144.65, 142.94, 142.02, 137.63, 133.83, 132.49, 130.86, 129.69, 128.94, 127.87, 122.46, 121.49, 121.16, 120.28, 114.51, 110.68, 34.34 ppm; HRMS: calc. for  $\text{C}_{20}\text{H}_{16}\text{NOSe}^+ [\text{M}+\text{H}]^+$ : 366.0397, found: 366.0391.

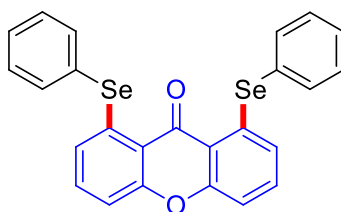

**1,8-Bis(phenylselanyl)-9H-xanthen-9-one (6d)**

Faint Yellow solid; mp 230.2-230.1 °C;  $R_f = 0.3$  (30% DCM in petroleum ether);  $^1\text{H NMR}$  (400 MHz,  $\text{CDCl}_3$ )  $\delta$  7.77 (d,  $J = 6.3$  Hz, 4H), 7.49 – 7.44 (m, 6H), 7.29 (t,  $J = 8.1$  Hz, 2H), 7.15 (d,  $J = 8.1$  Hz, 2H), 6.73 (d,  $J = 7.9$  Hz, 2H) ppm;  $^{13}\text{C NMR}$  (101 MHz,  $\text{CDCl}_3$ )  $\delta$  179.12, 157.08, 141.73, 137.62, 133.56, 129.83, 129.24, 129.17, 123.37, 119.43, 113.31 ppm; HRMS: calc. for  $\text{C}_{25}\text{H}_{16}\text{O}_2\text{Se}_2^+ [\text{M}+\text{H}]^+$ : 508.9559, found: 508.9562.

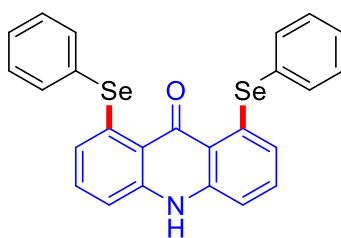

**1,8-Bis(phenylselanyl)acridin-9(10H)-one (6e)**

Yellow solid; mp 228.2-228.5 °C;  $R_f = 0.3$  (50% DCM in petroleum ether);  $^1\text{H NMR}$  (400 MHz, DMSO)  $\delta$  11.81 (brs, 1H), 7.76 – 7.66 (m, 4H), 7.58 – 7.48 (m, 6H), 7.36 (t,  $J = 8.0$  Hz, 2H), 7.22 (d,  $J = 8.0$  Hz, 2H), 6.45 (d,  $J = 7.6$  Hz, 2H) ppm;  $^{13}\text{C NMR}$  (101 MHz,  $\text{CDCl}_3$ )  $\delta$  180.31, 142.02, 141.54, 137.66, 132.54, 130.15, 129.69, 128.95, 121.13, 119.38, 111.88 ppm; HRMS: calc. for  $\text{C}_{25}\text{H}_{17}\text{ONSe}_2^+ [\text{M}+\text{H}]^+$ : 507.9719, found: 507.9718.

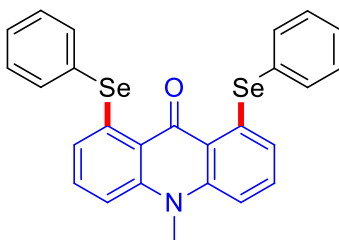

**10-Methyl-1,8-bis(phenylselanyl)acridin-9(10H)-one (6f)**

Yellow solid; mp 280.2-281.1 °C;  $R_f = 0.5$  (50% DCM in petroleum ether);  $^1\text{H NMR}$  (400 MHz,  $\text{CDCl}_3$ )  $\delta$  7.78 – 7.76 (m, 4H), 7.46 – 7.42 (m, 6H), 7.26 (t,  $J = 8.1$  Hz, 2H), 7.14 (d,  $J = 8.5$  Hz, 2H), 6.67 (d,  $J = 7.8$  Hz, 2H), 3.79 (s, 3H) ppm;  $^{13}\text{C NMR}$  (101 MHz,  $\text{CDCl}_3$ )  $\delta$  179.79, 144.11, 143.01, 137.61, 132.44, 130.86, 129.68, 128.90, 121.30, 120.36, 110.44, 35.14 ppm; HRMS: calc. for  $\text{C}_{26}\text{H}_{19}\text{NOSe}_2^+$   $[\text{M}+\text{H}]^+$ : 521.9875, found: 521.9859.

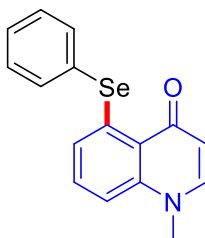

**1-Methyl-5-(phenylselanyl)quinolin-4(1H)-one (6g)**

White solid; mp 195.4-196.1 °C;  $R_f = 0.4$  (4% MeOH in dichloromethane ether);  $^1\text{H NMR}$  (400 MHz, DMSO)  $\delta$  7.94 (d,  $J = 7.6$  Hz, 1H), 7.66 – 7.64 (m, 2H), 7.47 (d,  $J = 6.6$  Hz, 3H), 7.37 – 7.30 (m, 2H), 6.59 (d,  $J = 7.3$  Hz, 1H), 6.07 (d,  $J = 7.6$  Hz, 1H), 3.75 (s, 3H) ppm;  $^{13}\text{C NMR}$  (101 MHz, DMSO)  $\delta$  178.05, 144.79, 142.47, 139.07, 137.26, 131.49, 130.50, 130.15, 129.24, 123.99, 122.18, 112.81, 108.62, 40.82 ppm; HRMS: calc. for  $\text{C}_{16}\text{H}_{14}\text{NOSe}^+$   $[\text{M}+\text{H}]^+$ : 316.0241, found: 316.0234.

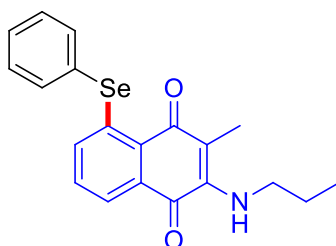

**2-Methyl-5-(phenylselanyl)-3-(propylamino)naphthalene-1,4-dione (6h)**

Red solid; mp 185.2-186.7 °C;  $R_f = 0.3$  (10% EtOAc in petroleum ether);  $^1\text{H NMR}$  (400 MHz,  $\text{CDCl}_3$ )  $\delta$  7.83 (dd,  $J = 7.3, 0.8$  Hz, 1H), 7.73 – 7.71 (m, 2H), 7.49 – 7.40 (m, 3H), 7.21 (t,  $J = 7.8$  Hz, 1H), 7.14 – 7.12 (m, 1H), 5.68 (brs, 1H), 3.51 (m, 2H), 2.29 (s, 3H), 1.71 – 1.62 (m, 2H), 1.00 (t,  $J = 7.4$  Hz, 3H) ppm;  $^{13}\text{C NMR}$  (101 MHz,  $\text{CDCl}_3$ )  $\delta$  184.92, 182.21, 145.45, 140.05, 137.57,

134.59, 131.89, 130.84, 129.78, 129.68, 129.19, 129.05, 124.04, 112.44, 47.19, 24.13, 11.24, 11.17 ppm; HRMS: calc. for  $C_{20}H_{20}NO_2Se^+$   $[M+H]^+$ : 386.0659, found: 386.0653.

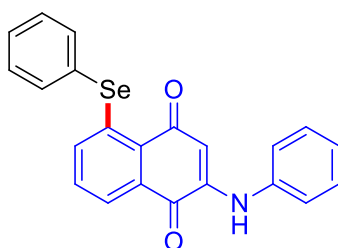

### 3-(Phenylamino)-8-(phenylselanyl)naphthalene-1,4-dione (6i)

Red brown solid; mp 173.7-174.5 °C;  $R_f = 0.3$  (10% EtOAc in petroleum ether);  $^1H$  NMR (400 MHz,  $CDCl_3$ )  $\delta$  8.13 (dd,  $J = 13.1, 7.5$  Hz, 2H), 7.82 (brs, 1H), 7.73 (t,  $J = 7.4$  Hz, 1H), 7.67 (t,  $J = 7.4$  Hz, 1H), 7.17 (t,  $J = 7.7$  Hz, 2H), 7.12 – 7.05 (m, 2H), 7.01 (t,  $J = 7.6$  Hz, 2H), 6.90 (d,  $J = 7.4$  Hz, 2H), 6.69 (d,  $J = 7.8$  Hz, 2H) ppm;  $^{13}C$  NMR (101 MHz,  $CDCl_3$ )  $\delta$  181.62, 180.33, 143.43, 136.65, 134.66, 133.25, 132.80, 131.36, 130.45, 129.57, 128.52, 127.97, 127.06, 126.82, 126.66, 124.19, 122.29, 114.21 ppm; HRMS: calc. for  $C_{22}H_{14}NO_2Se^+$   $[M+H]^+$ : 406.03463, found: 406.0341.

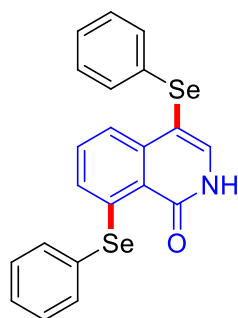

### 4,8-Bis(phenylselanyl)isoquinolin-1(2H)-one (6j)

White solid; mp 260.5-261.1 °C;  $R_f = 0.3$  (25% EtOAc in petroleum ether);  $^1H$  NMR (400 MHz, DMSO)  $\delta$  11.84 (d,  $J = 5.7$  Hz, 1H), 7.74 (d,  $J = 6.0$  Hz, 1H), 7.67 (d,  $J = 6.3$  Hz, 2H), 7.55 (d,  $J = 8.0$  Hz, 1H), 7.52 – 7.47 (m, 3H), 7.33 (t,  $J = 8.0$  Hz, 1H), 7.27 – 7.14 (m, 5H), 6.69 (d,  $J = 7.8$  Hz, 1H) ppm;  $^{13}C$  NMR (101 MHz, DMSO)  $\delta$  162.80, 140.31, 140.15, 138.15, 137.26, 132.49, 131.77, 130.14, 129.42, 128.73, 126.33, 125.79, 123.47, 123.43, 102.15 ppm; HRMS: calc. for  $C_{21}H_{15}NOSe_2^+$   $[M+H]^+$ : 457.9562, found: 457.9555.

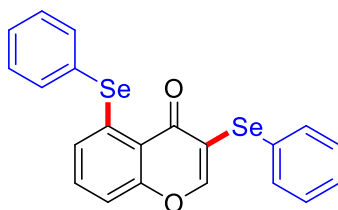

**3,5-Bis(phenylselanyl)-4*H*-chromen-4-one (7)**

Faint Yellow solid; mp 126.2-127.3 °C;  $R_f = 0.5$  (10% EtOAc in petroleum ether);  $^1\text{H NMR}$  (400 MHz,  $\text{CDCl}_3$ )  $\delta$  7.73 (s, 1H), 7.72 (dd,  $J = 7.7, 1.5$  Hz, 2H), 7.62 (dd,  $J = 6.5, 3.0$  Hz, 2H), 7.47 – 7.41 (m, 3H), 7.34 – 7.31 (m, 3H), 7.24 (t,  $J = 8.0$  Hz, 1H), 7.11 (dd,  $J = 8.2, 0.6$  Hz, 1H), 6.76 – 6.74 (m, 1H) ppm;  $^{13}\text{C NMR}$  (101 MHz,  $\text{CDCl}_3$ )  $\delta$  176.40, 157.93, 154.66, 140.83, 137.47, 134.02, 132.70, 129.86, 129.58, 129.27, 128.93, 128.18, 127.85, 124.64, 120.68, 117.84, 113.75 ppm; HRMS: calc. for  $\text{C}_{21}\text{H}_{15}\text{O}_2\text{Se}_2^+$   $[\text{M}+\text{H}]^+$ : 458.9403, found: 458.9398.

Copies of  $^1\text{H}$  and  $^{13}\text{C}$  NMR spectra of products 3, 6 and 7

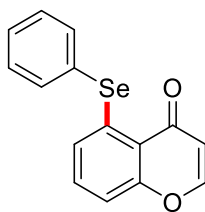

**3a**

$^1\text{H}$  NMR

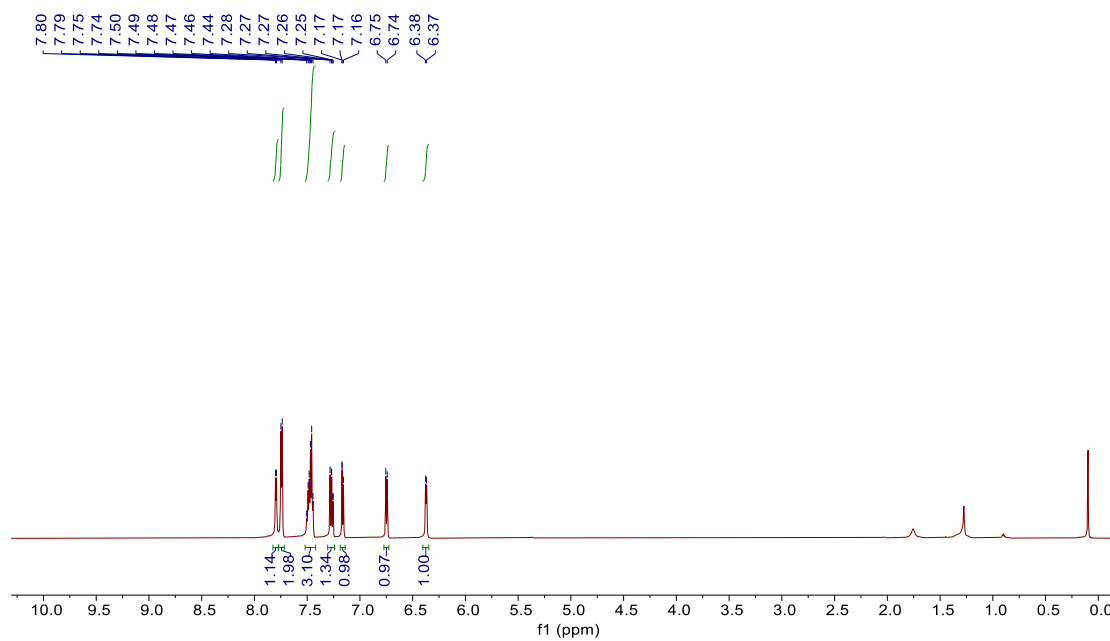

$^{13}\text{C}$  NMR

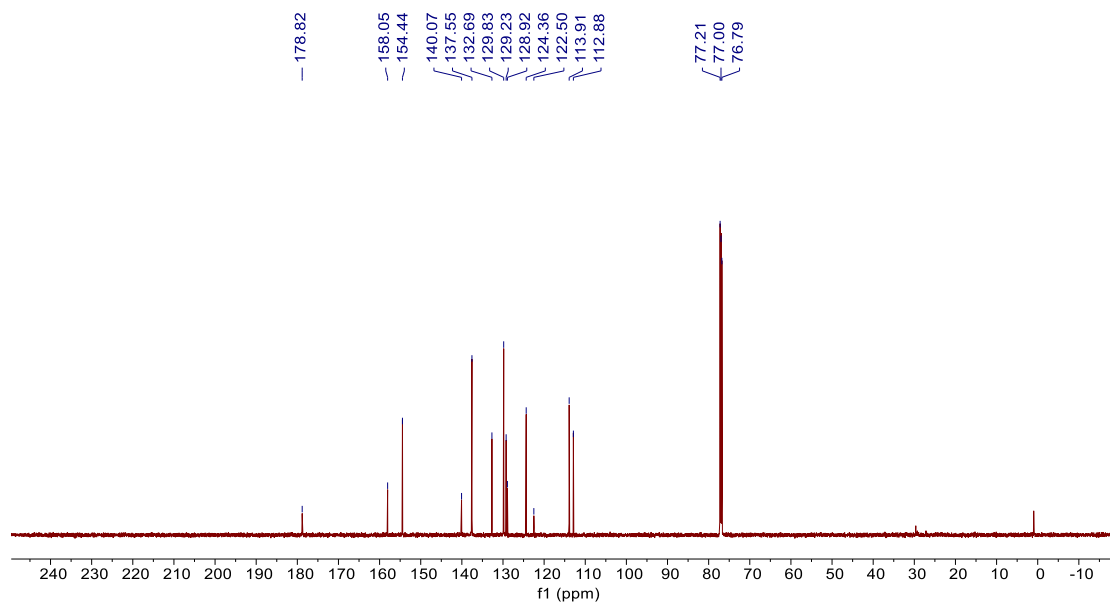



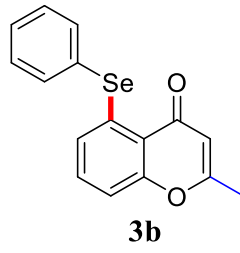

<sup>1</sup>H NMR

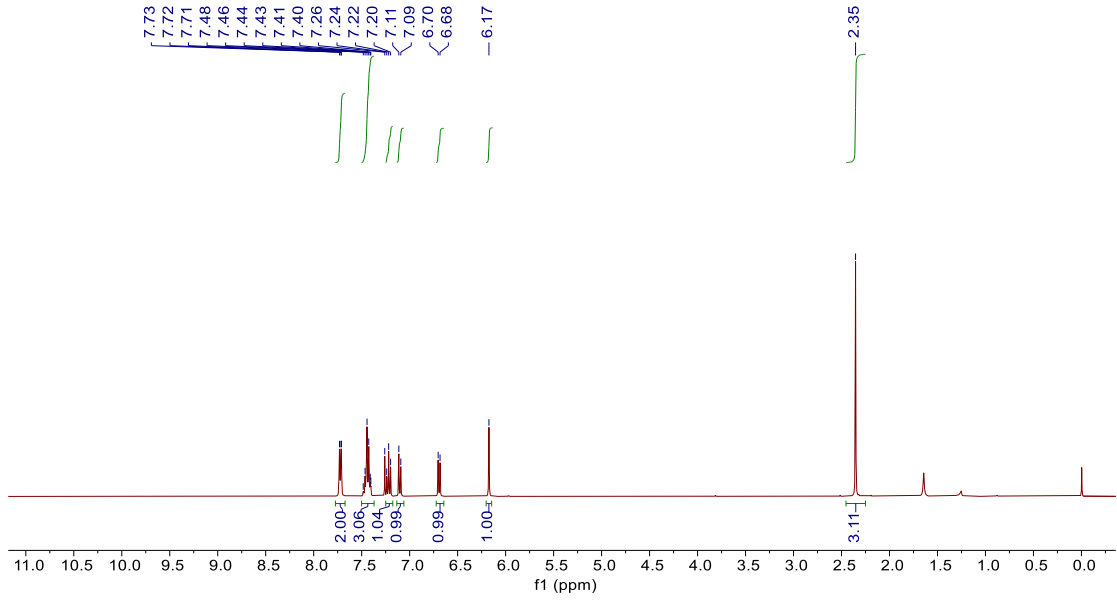

<sup>13</sup>C NMR

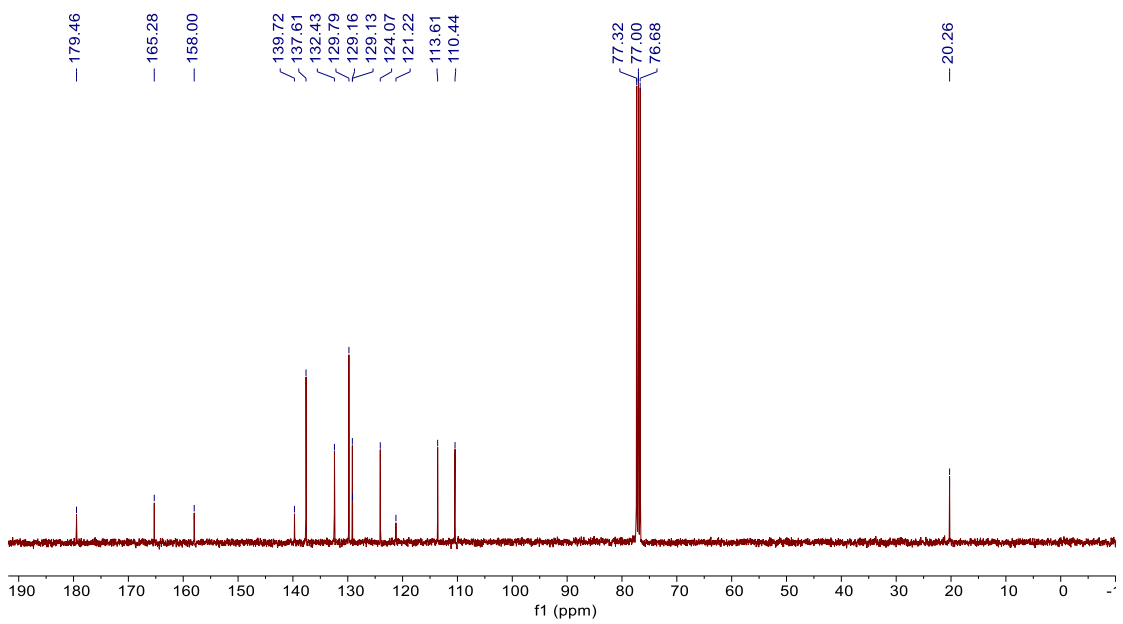

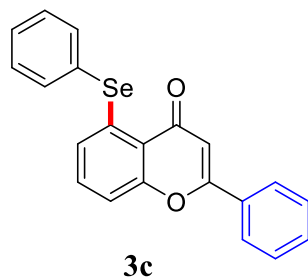

<sup>1</sup>H NMR

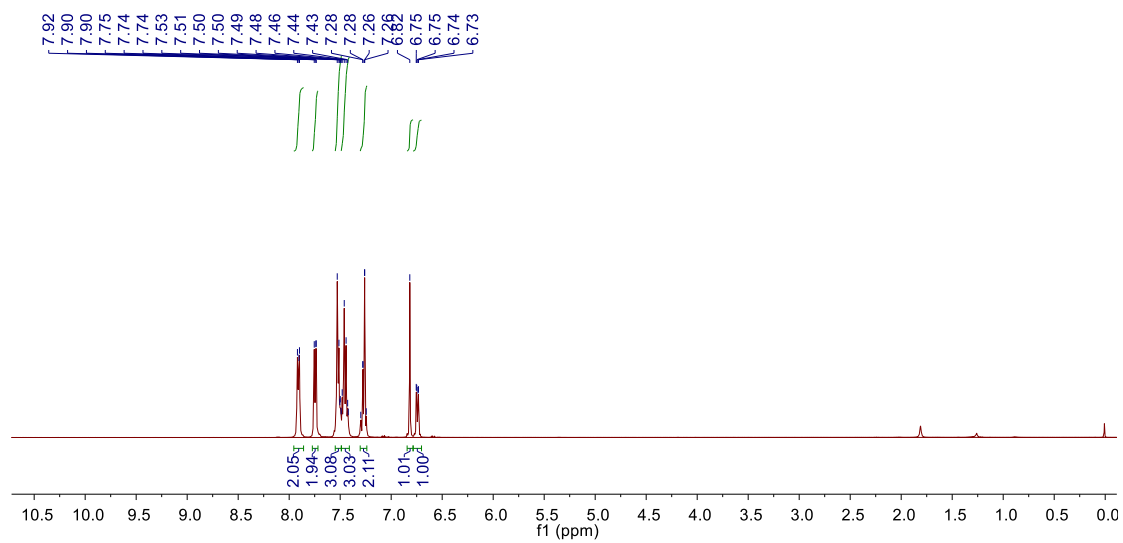

<sup>13</sup>C NMR

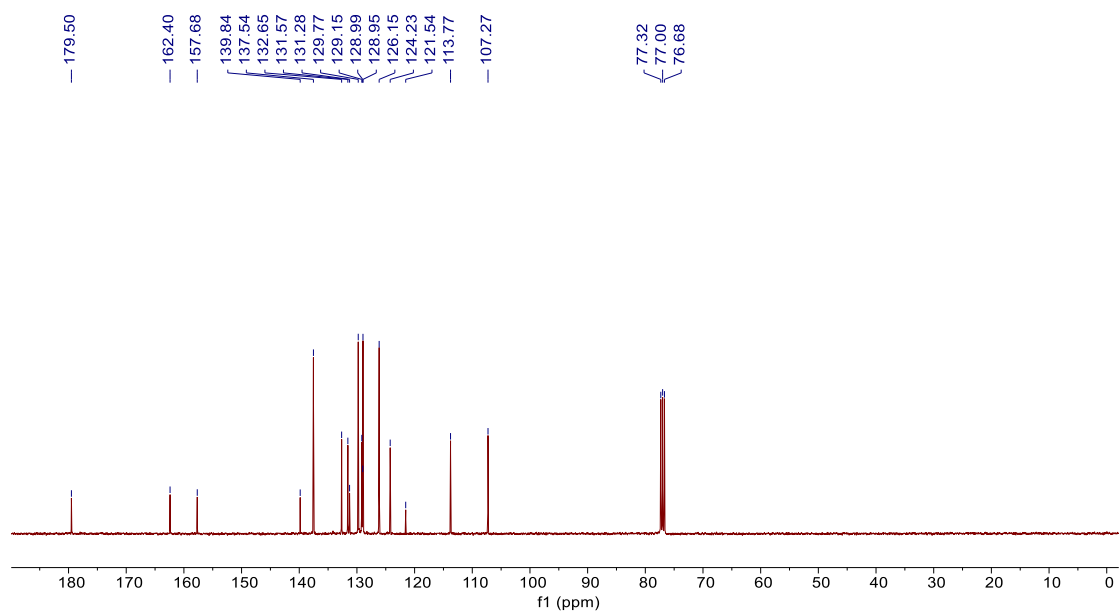

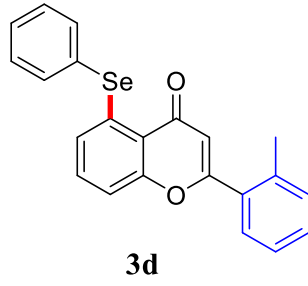

<sup>1</sup>H NMR

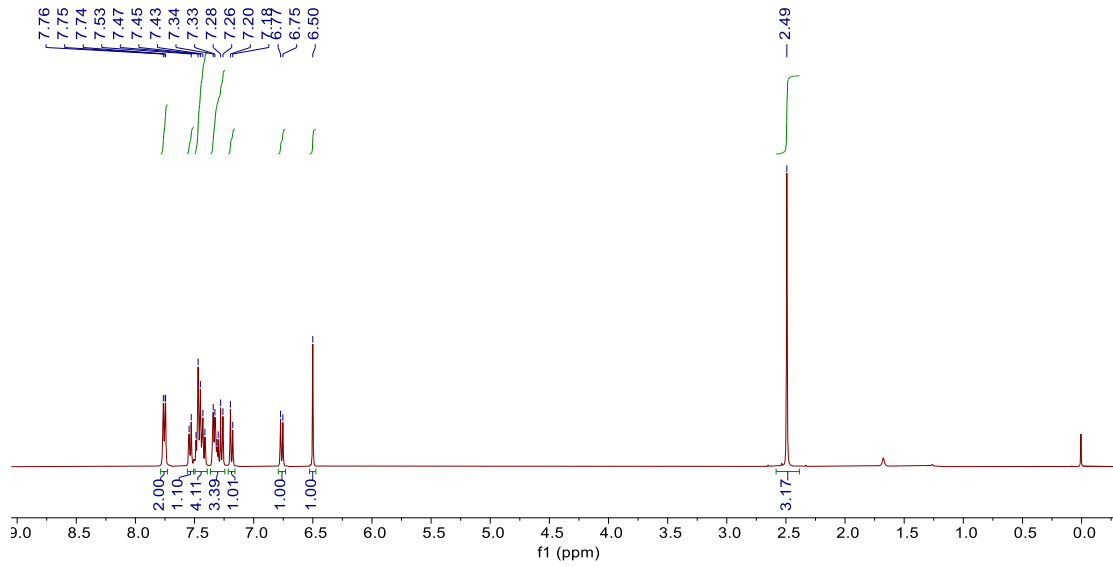

<sup>13</sup>C NMR

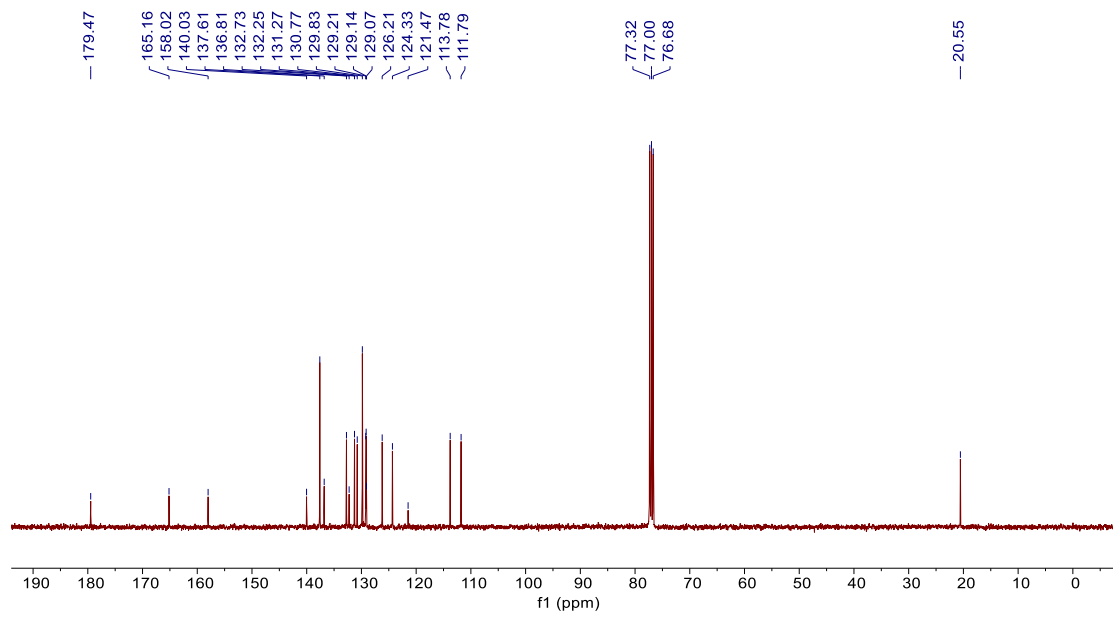

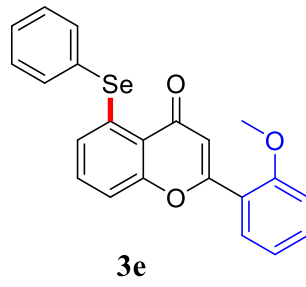

<sup>1</sup>H NMR

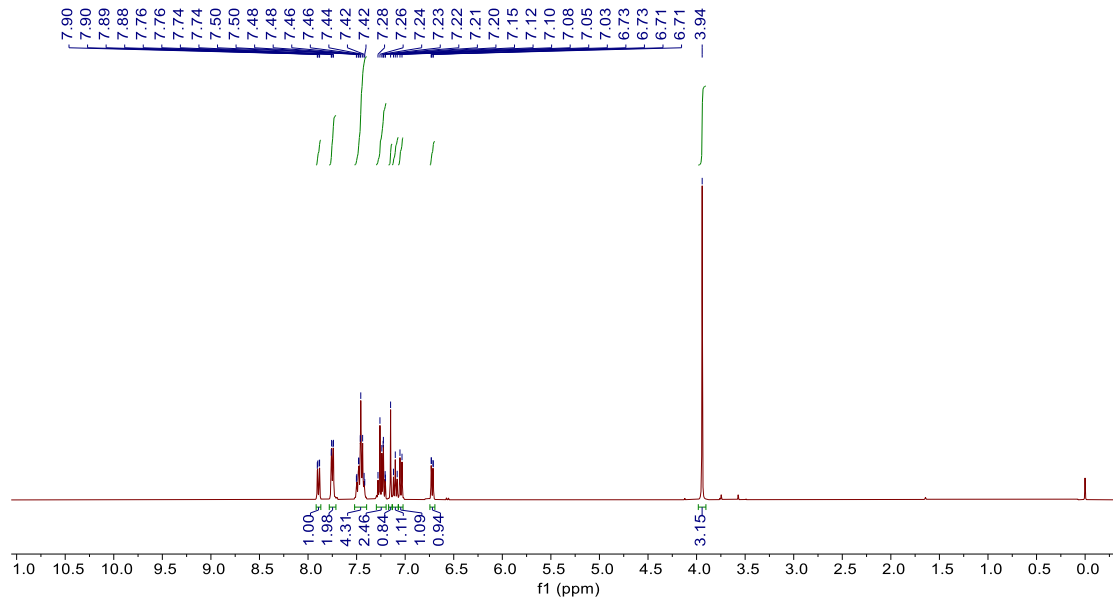

<sup>13</sup>C NMR

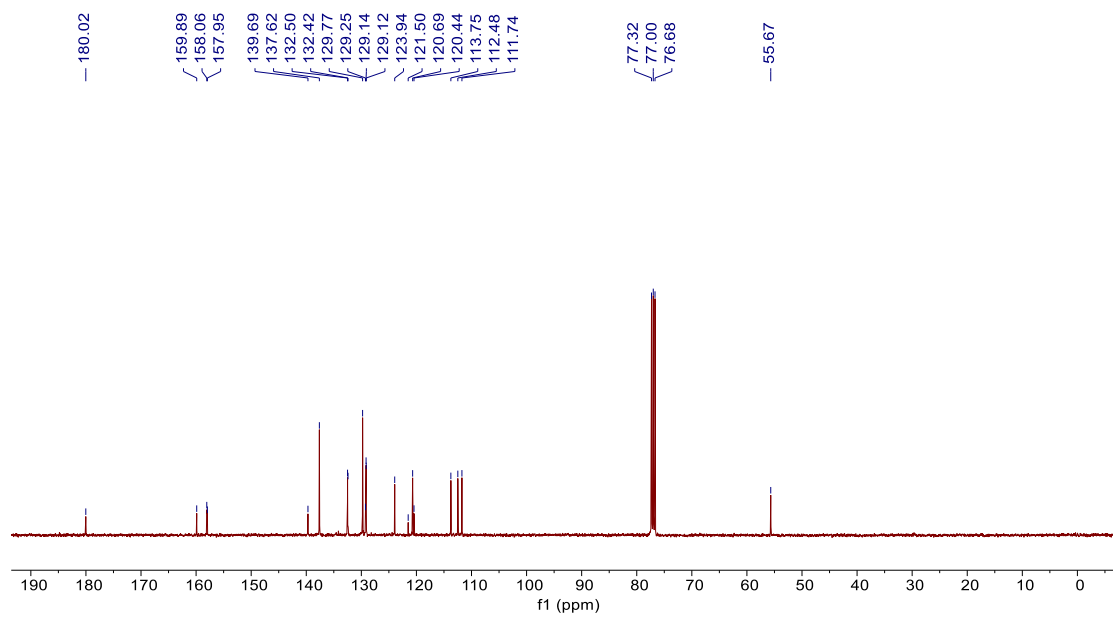

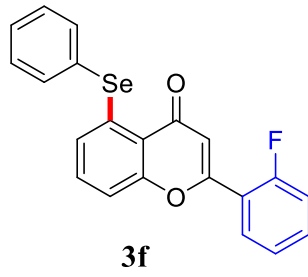

<sup>1</sup>H NMR

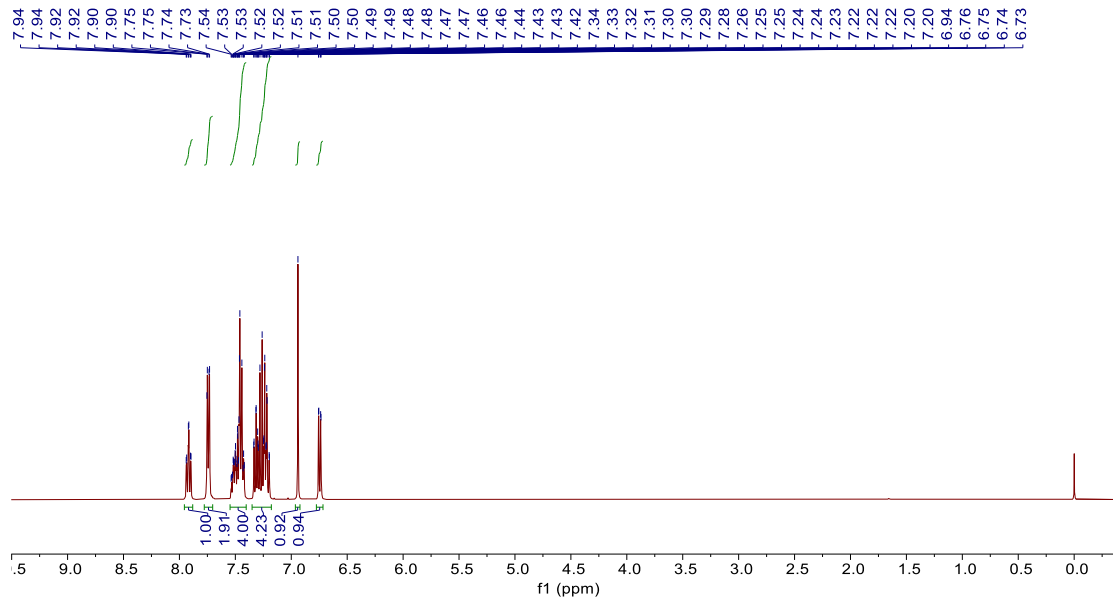

<sup>13</sup>C NMR

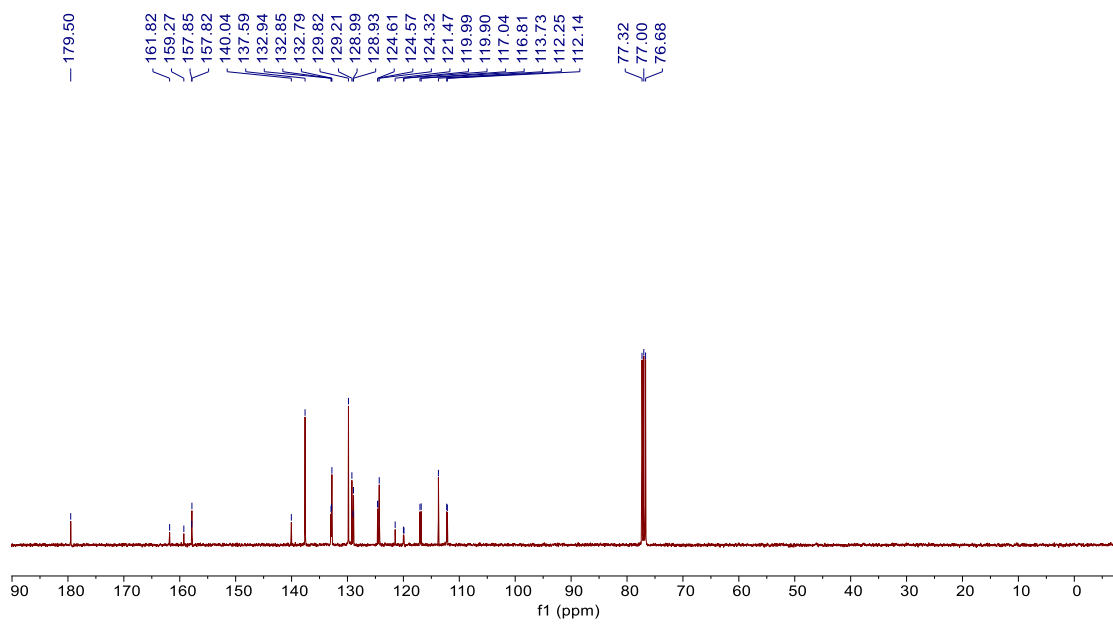

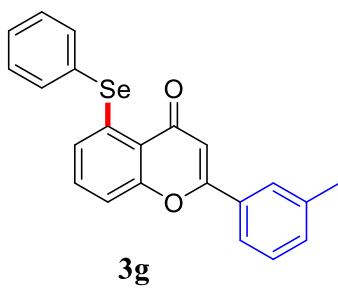

<sup>1</sup>H NMR

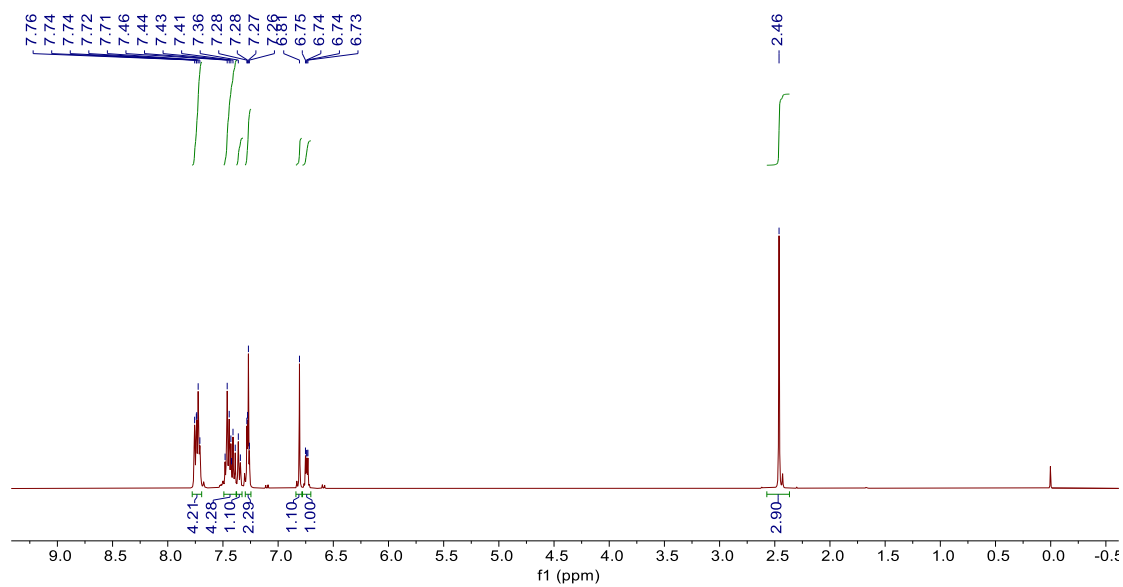

<sup>13</sup>C NMR

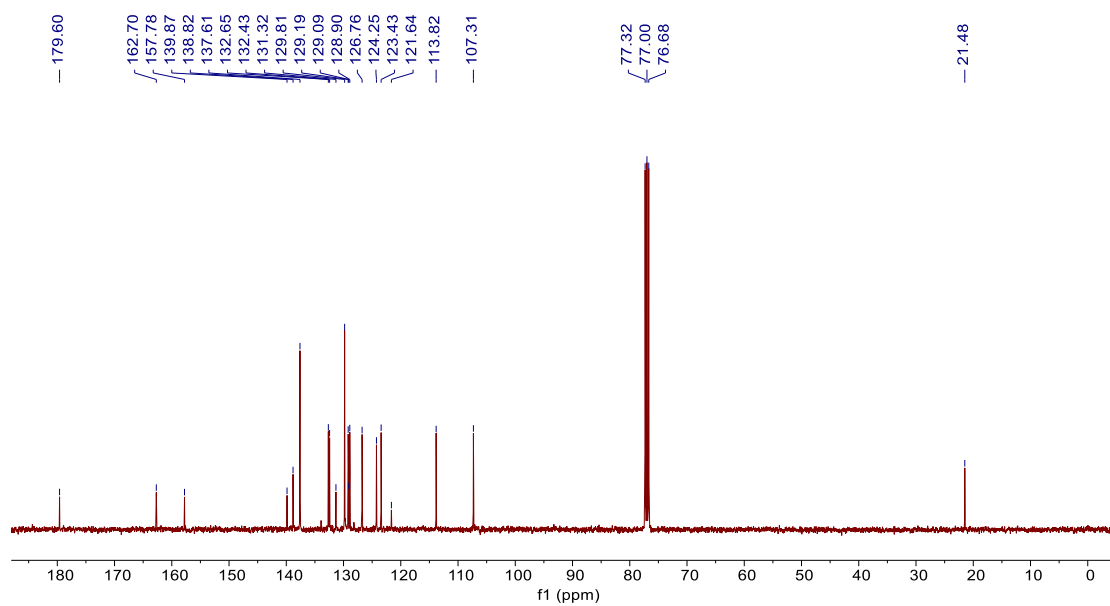

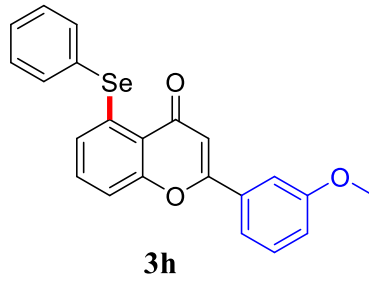

<sup>1</sup>H NMR

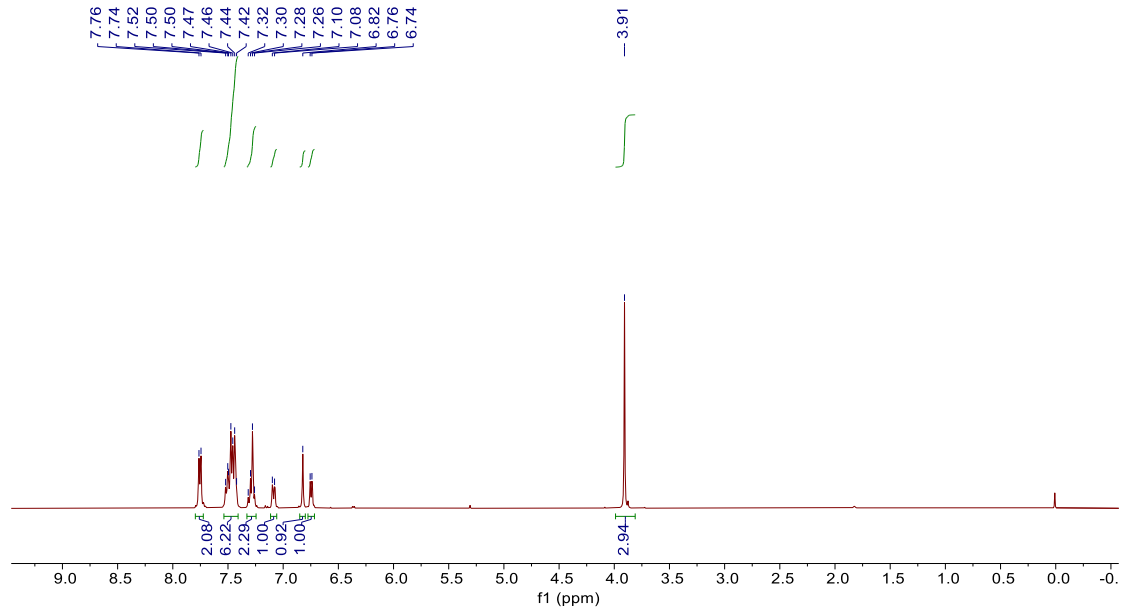

<sup>13</sup>C NMR

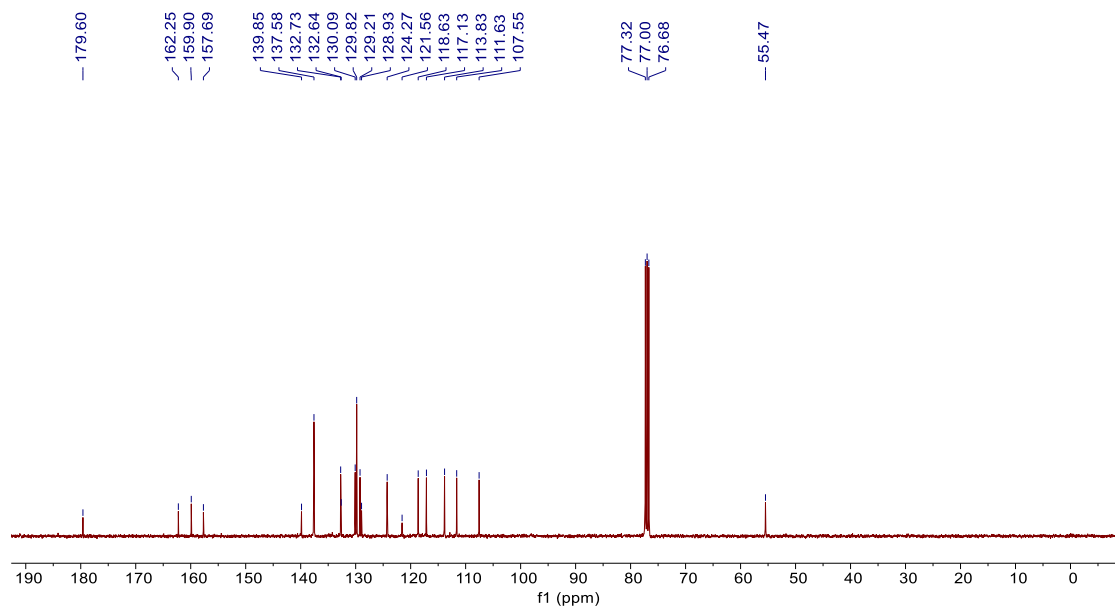

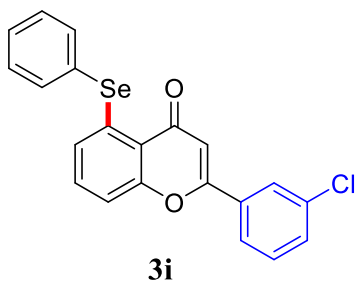

<sup>1</sup>H NMR

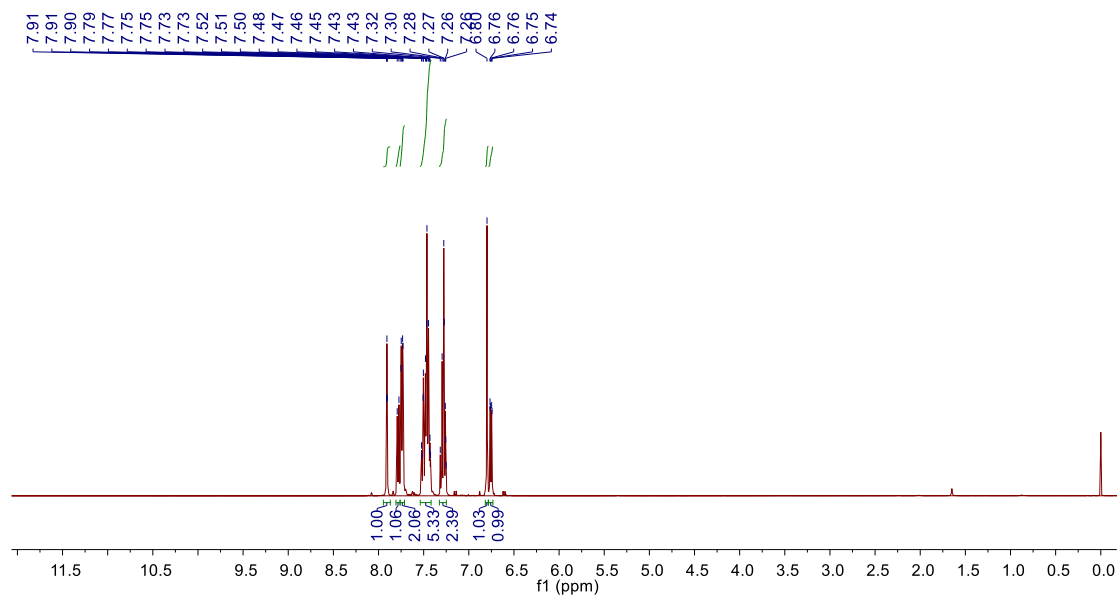

<sup>13</sup>C NMR

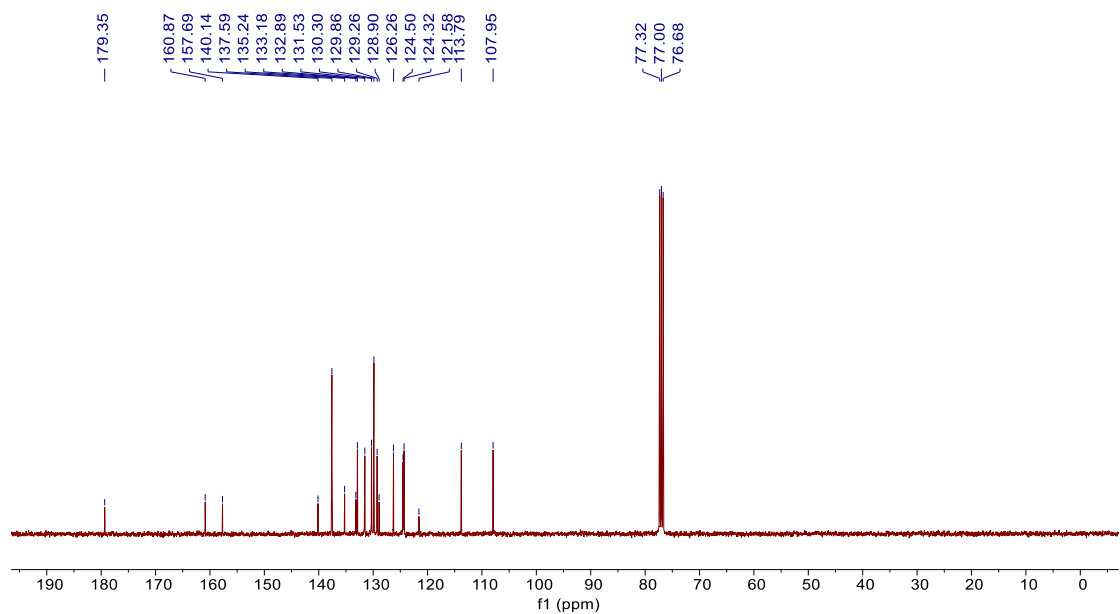



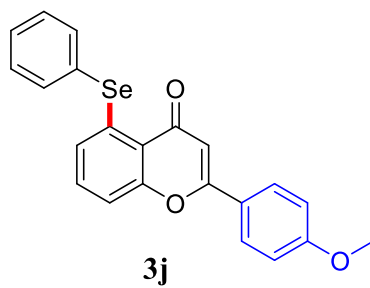

<sup>1</sup>H NMR

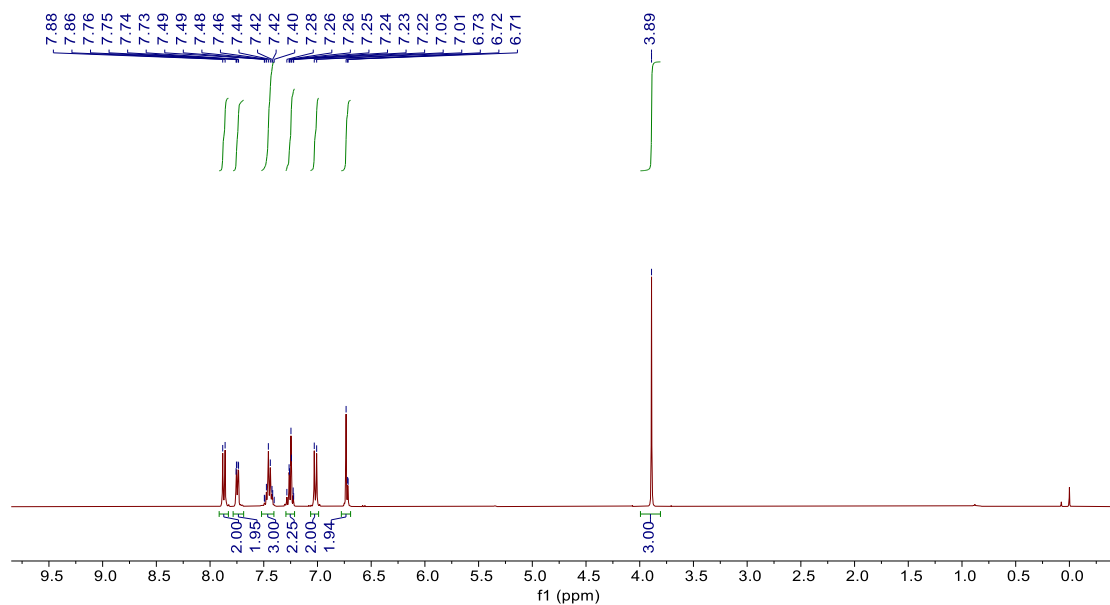

<sup>13</sup>C NMR

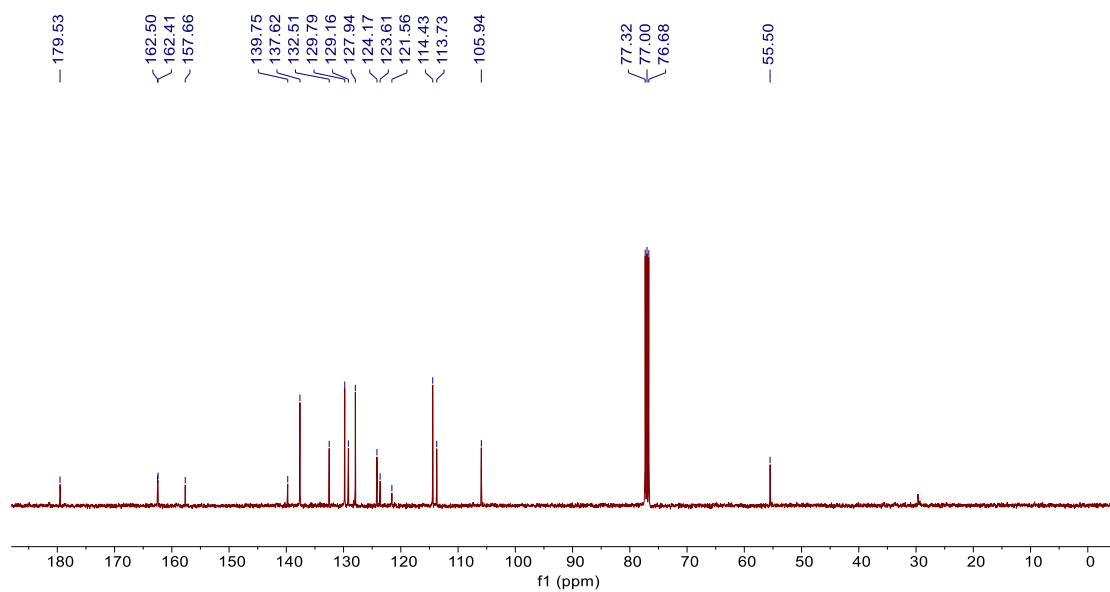

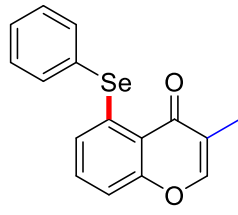

**3k**

<sup>1</sup>H NMR

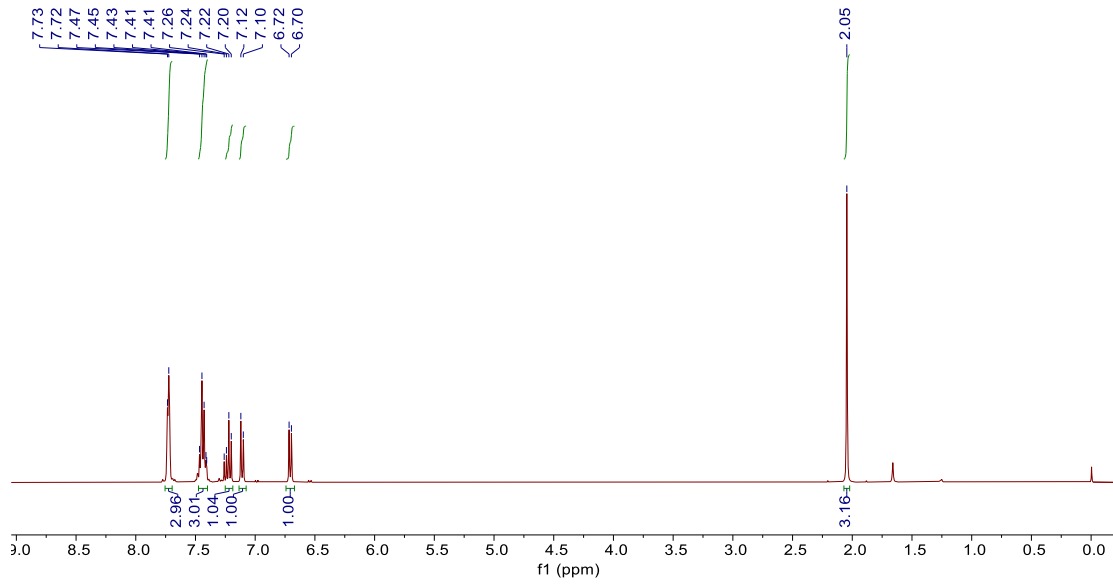

<sup>13</sup>C NMR

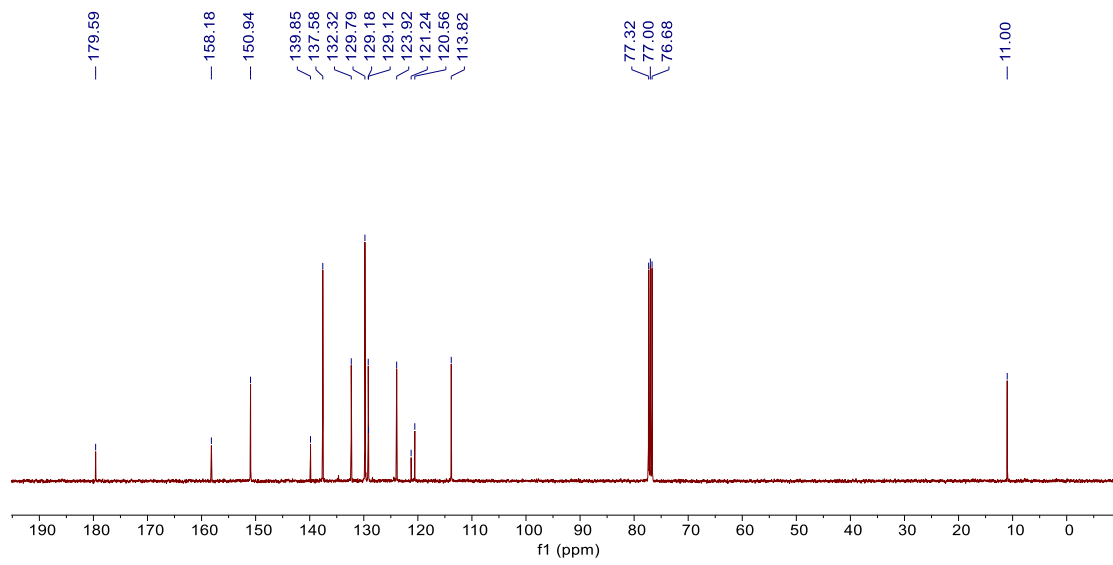

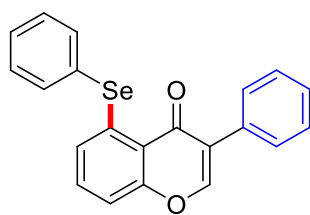

**31**

<sup>1</sup>H NMR

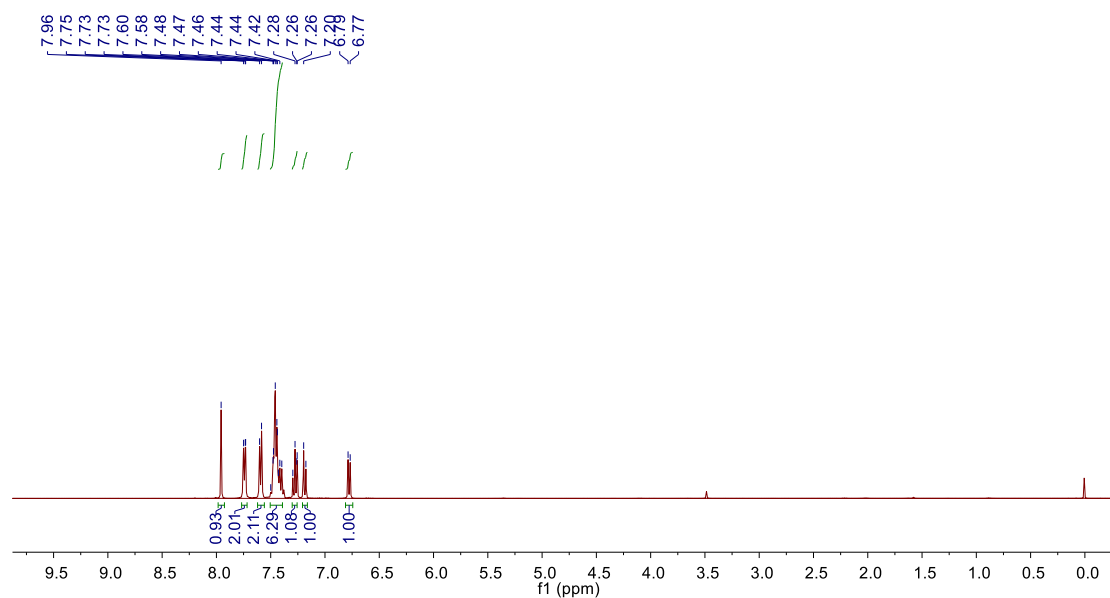

<sup>13</sup>C NMR

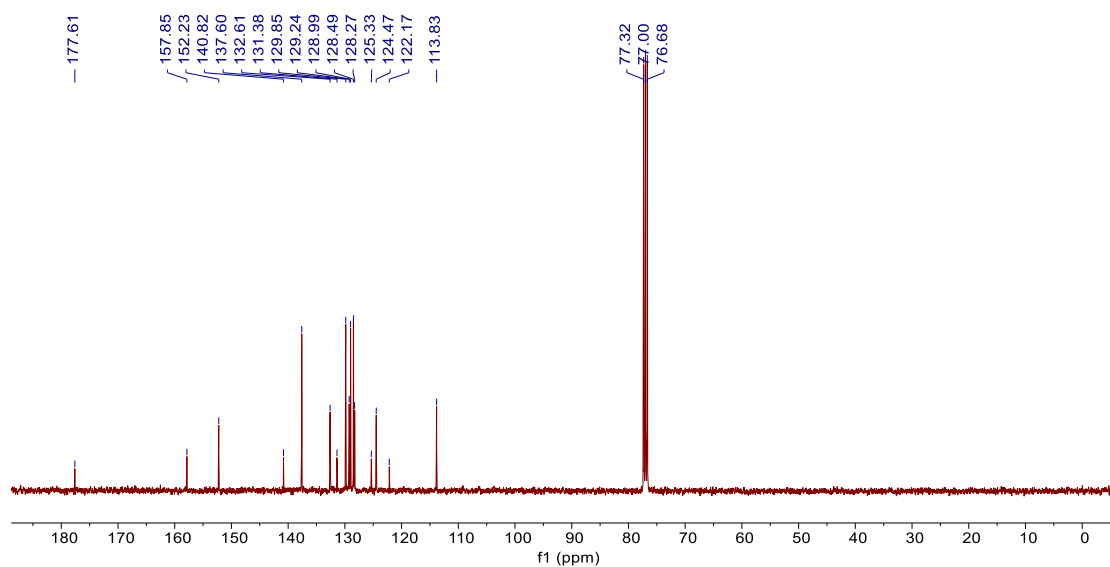

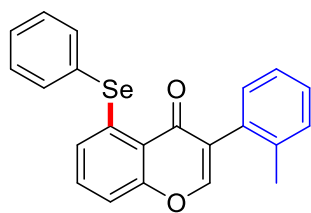

**3m**

<sup>1</sup>H NMR

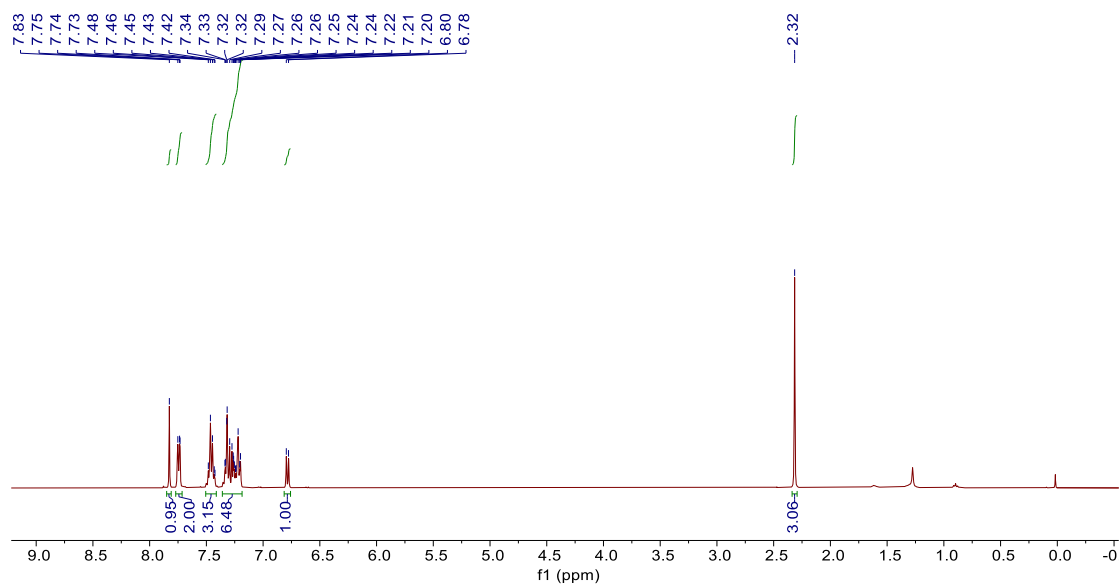

<sup>13</sup>C NMR

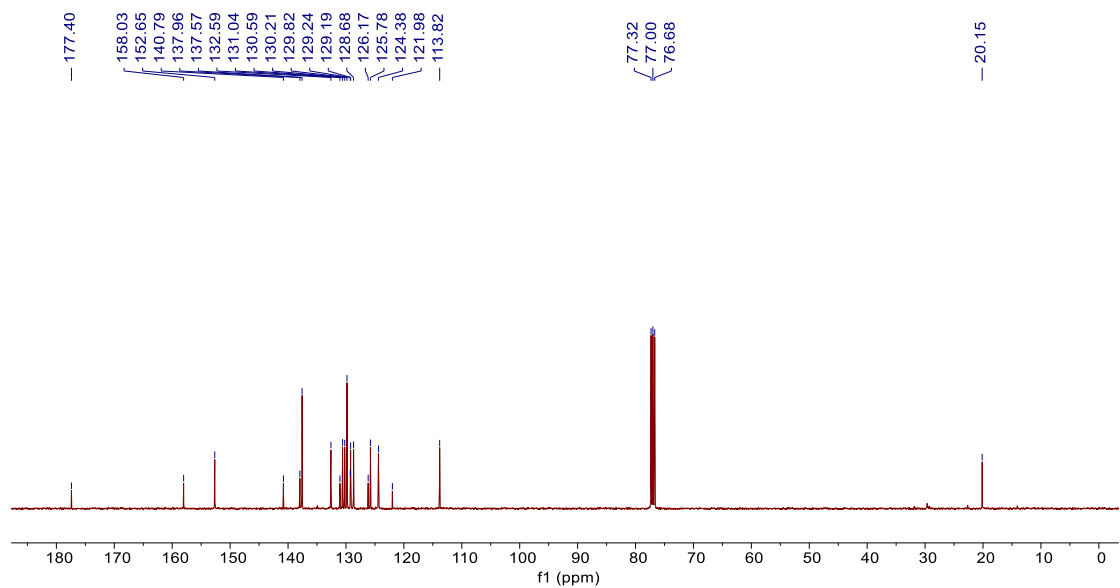

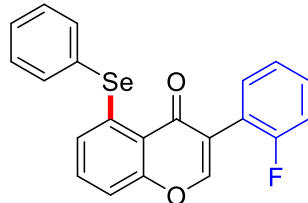

**3n**

<sup>1</sup>H NMR

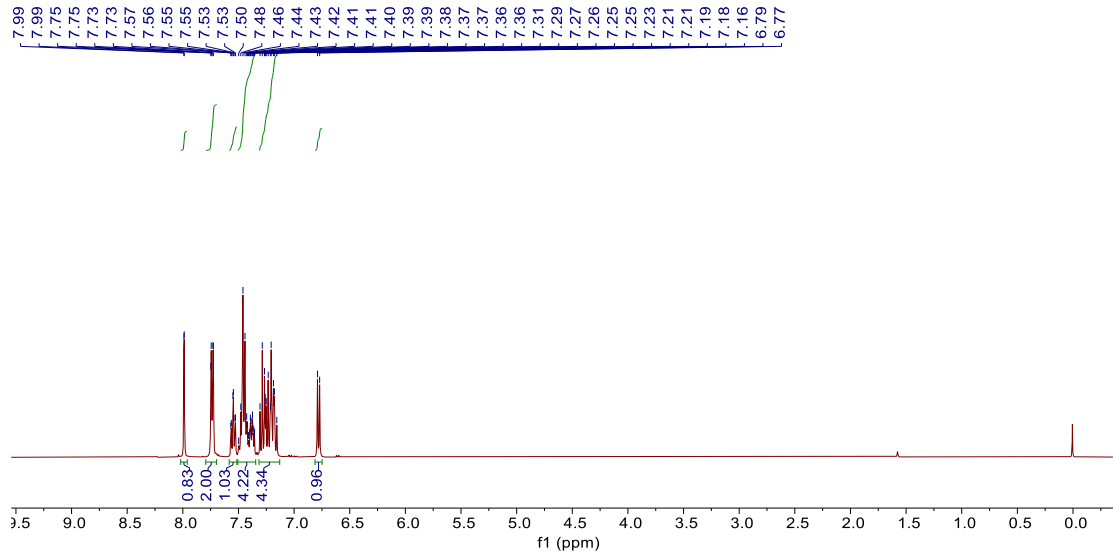

<sup>13</sup>C NMR

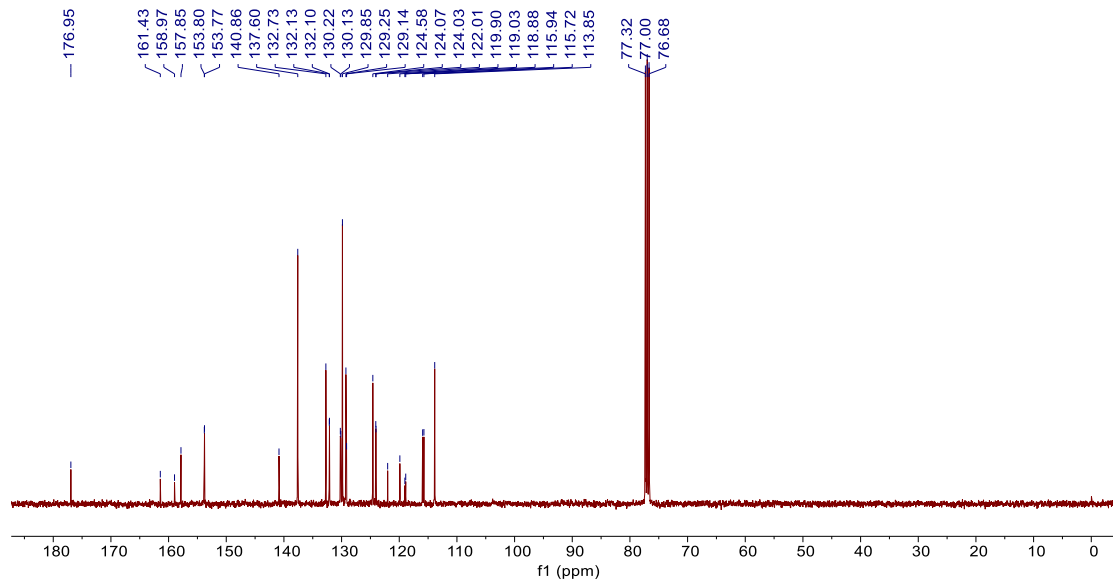

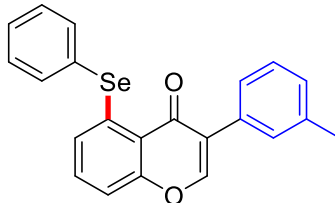

**30**

<sup>1</sup>H NMR

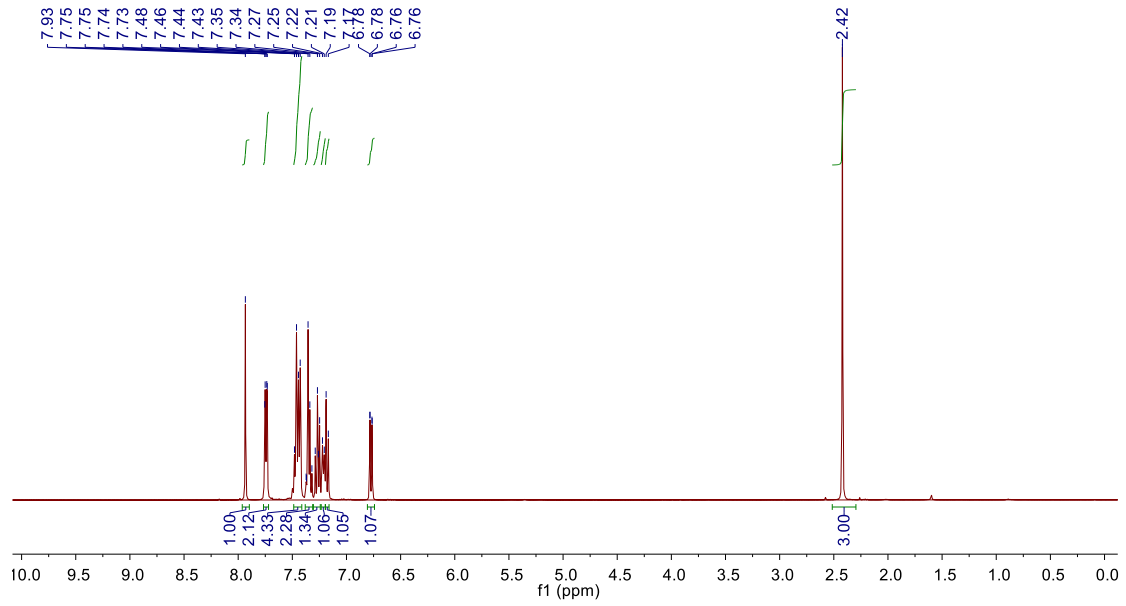

<sup>13</sup>C NMR

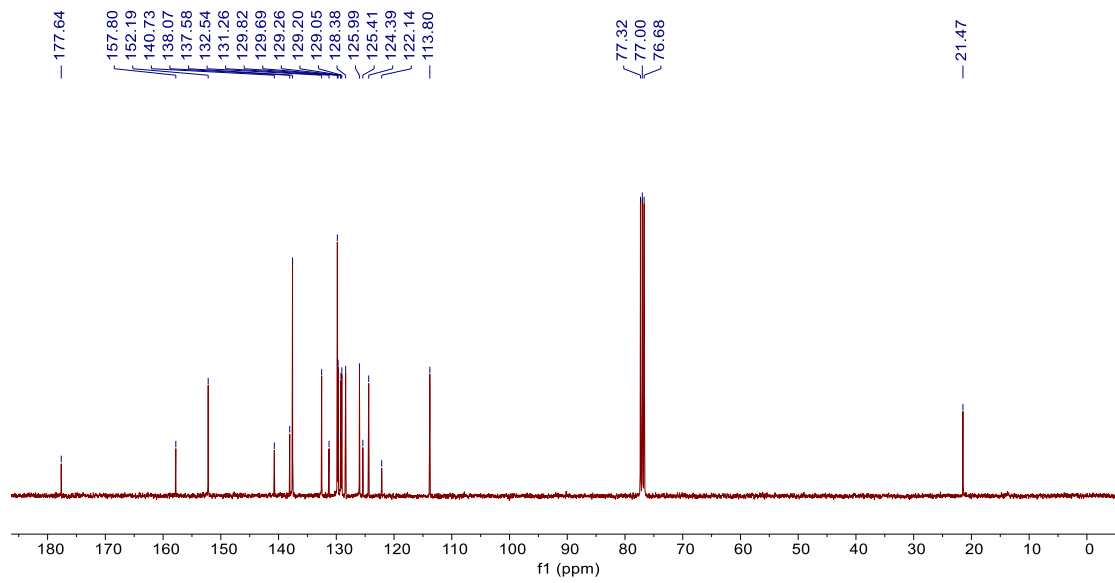

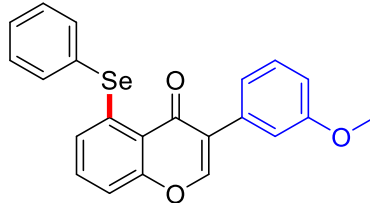

**3p**

<sup>1</sup>H NMR

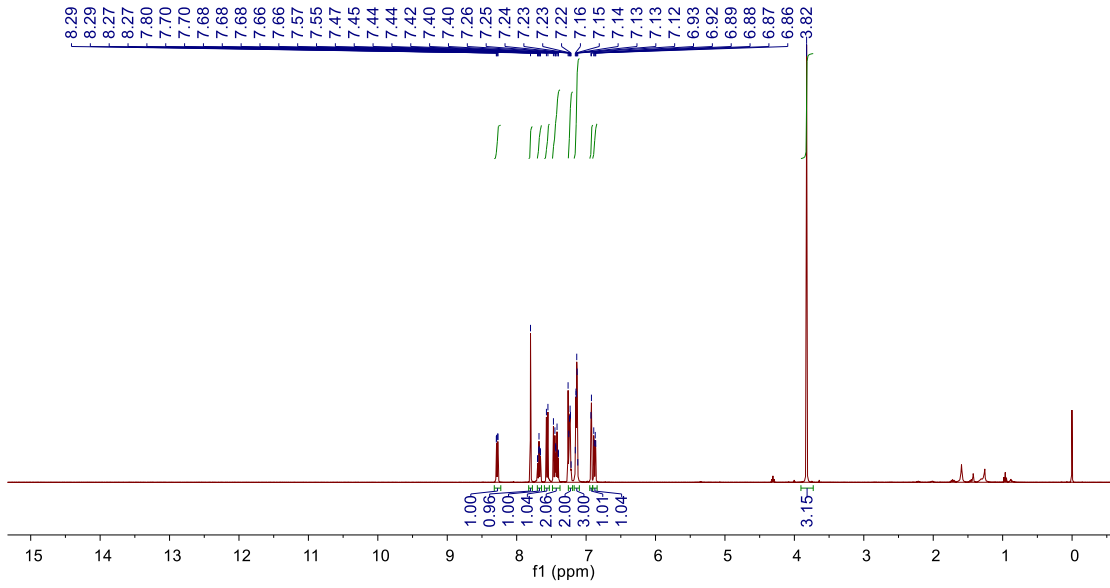

<sup>13</sup>C NMR

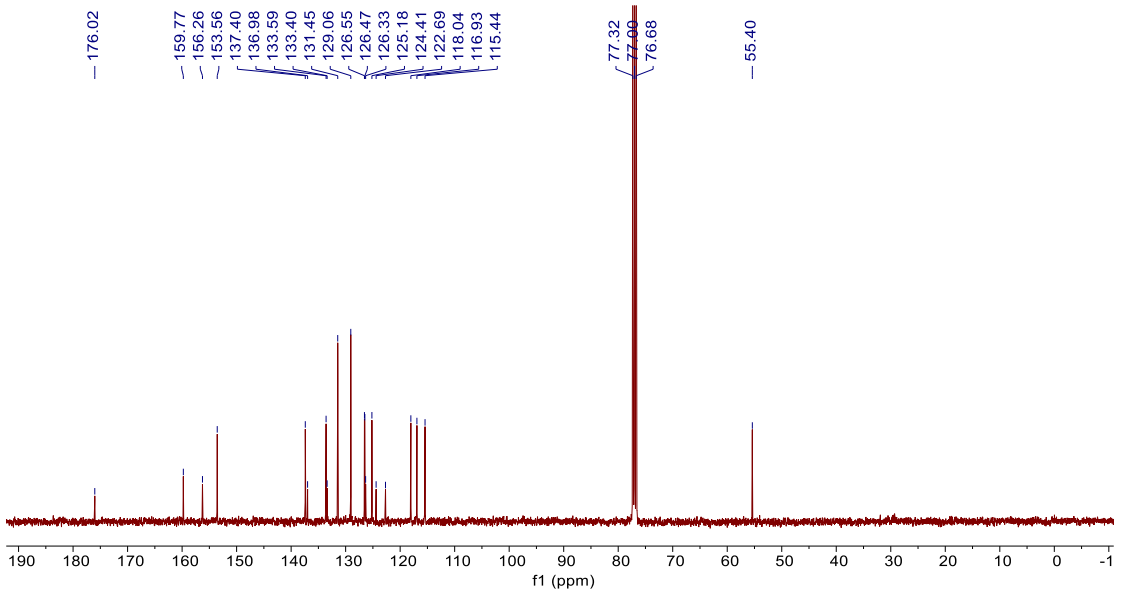

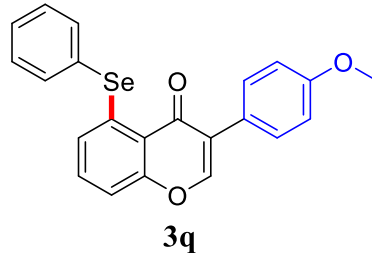

<sup>1</sup>H NMR

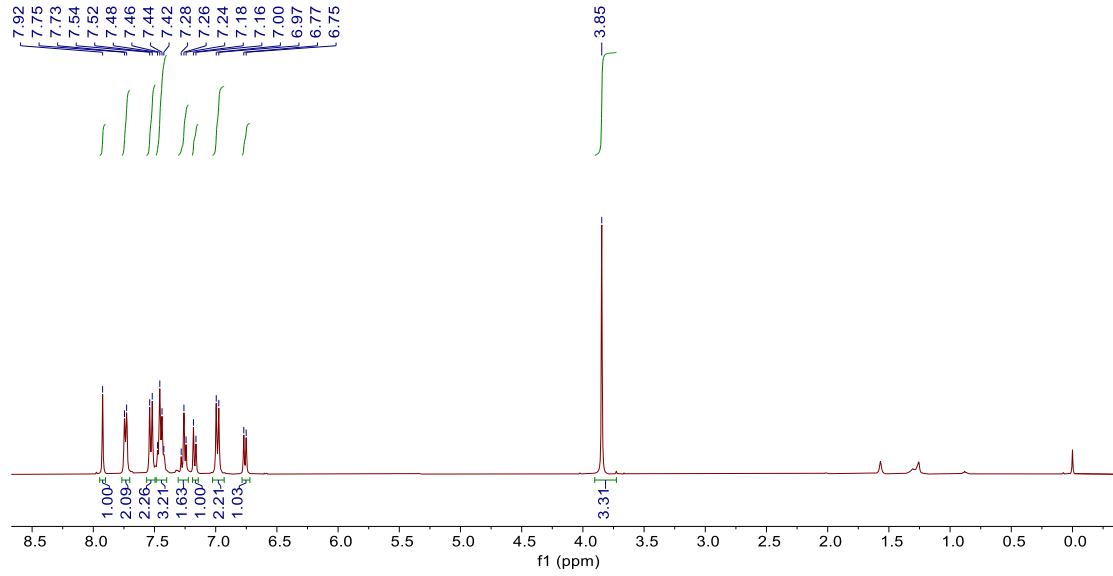

<sup>13</sup>C NMR

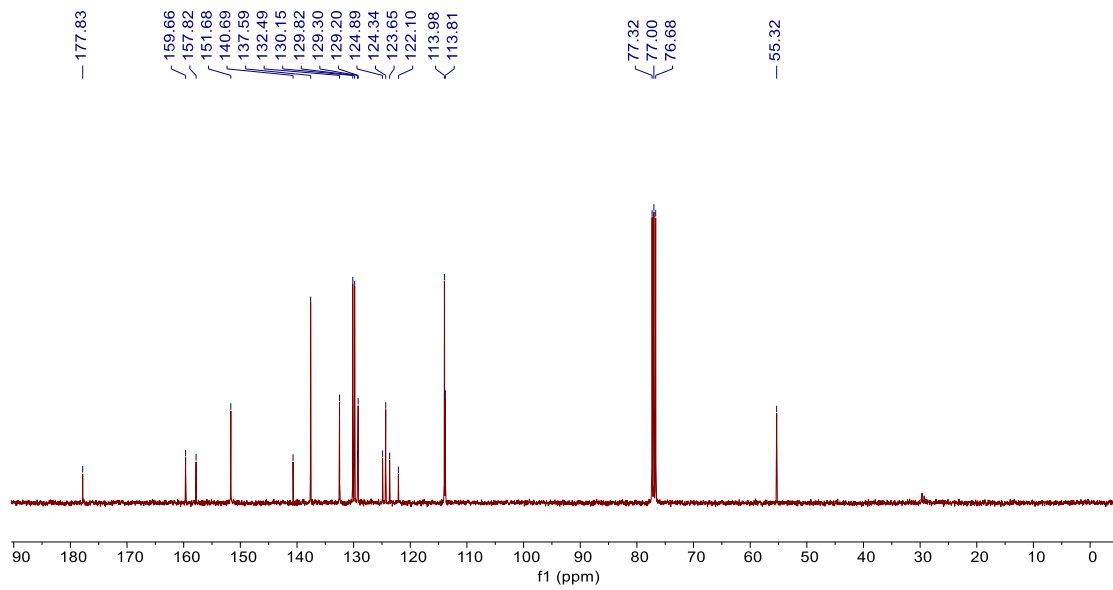



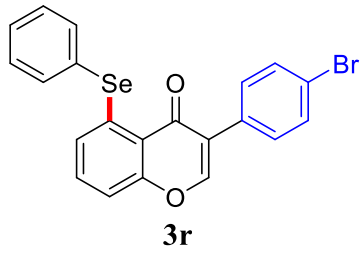

<sup>1</sup>H NMR

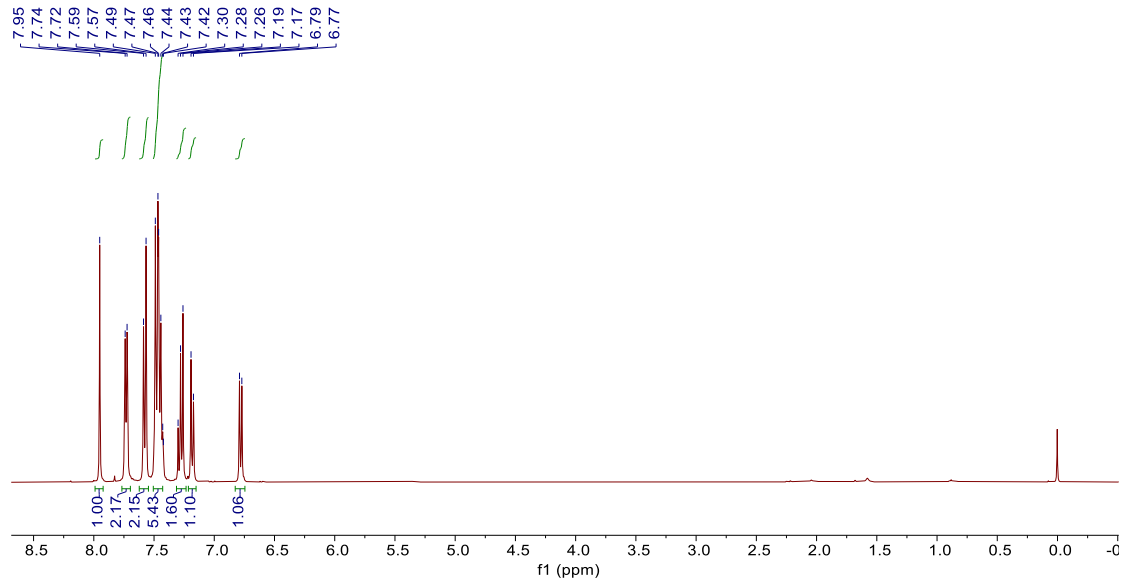

<sup>13</sup>C NMR

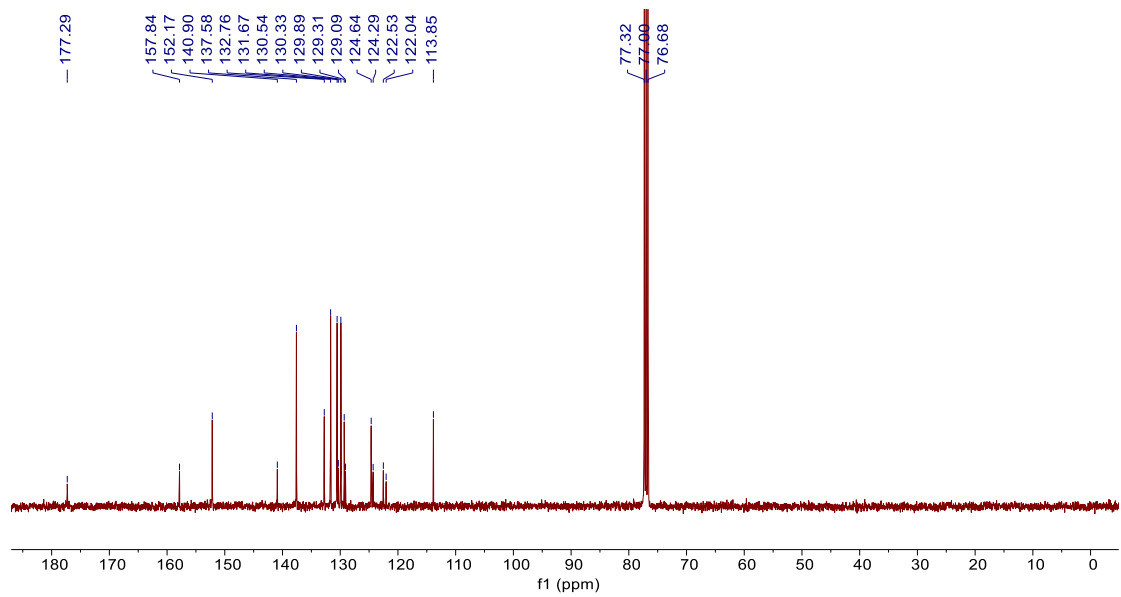

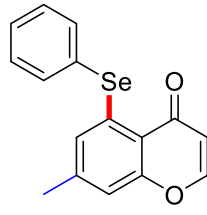

3s

<sup>1</sup>H NMR

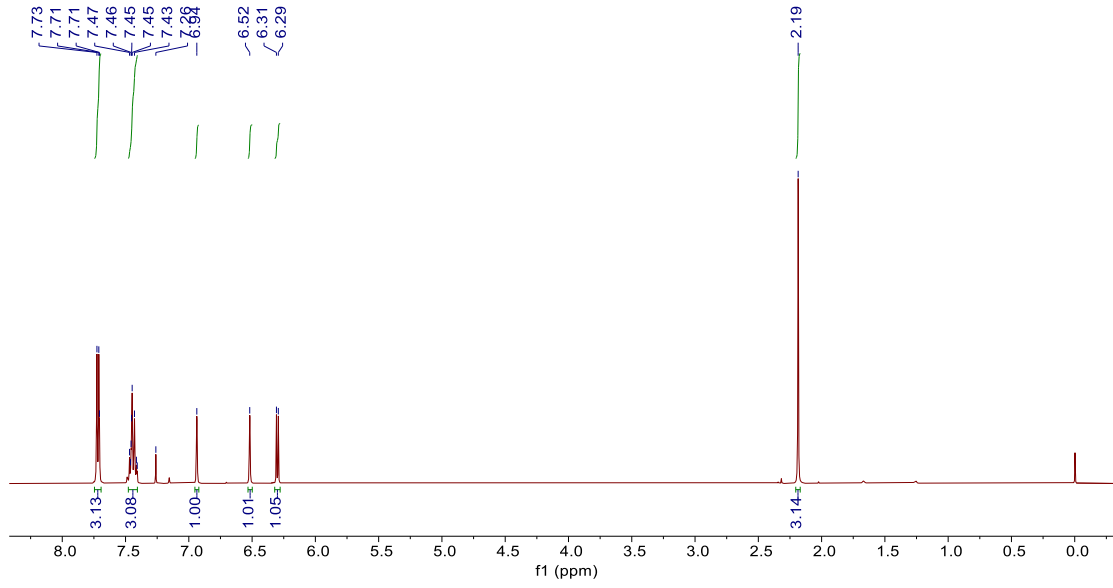

<sup>13</sup>C NMR

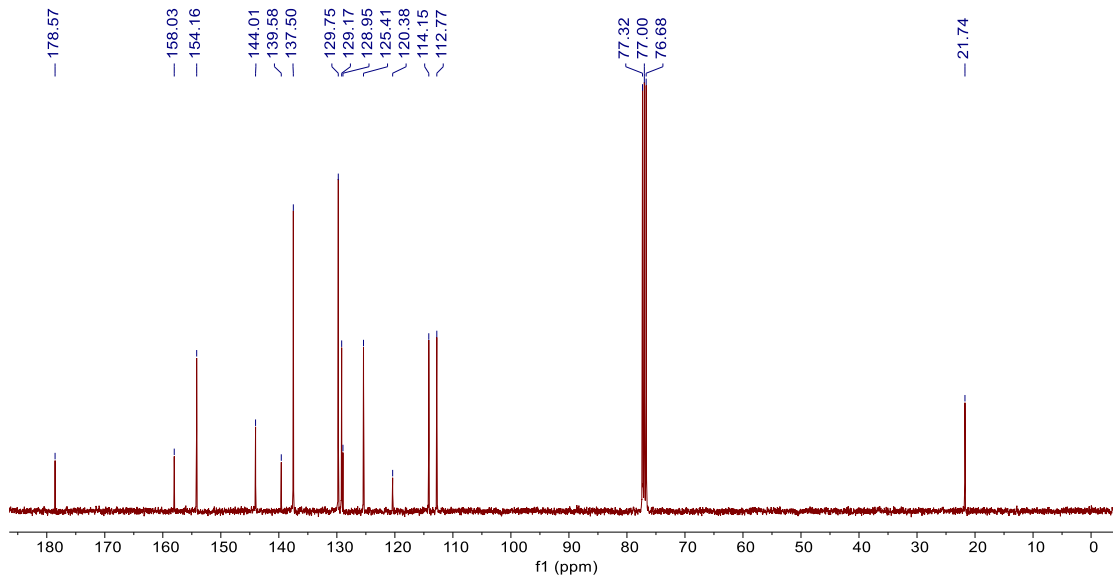

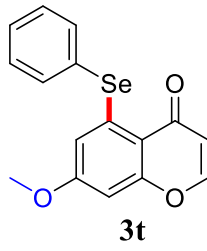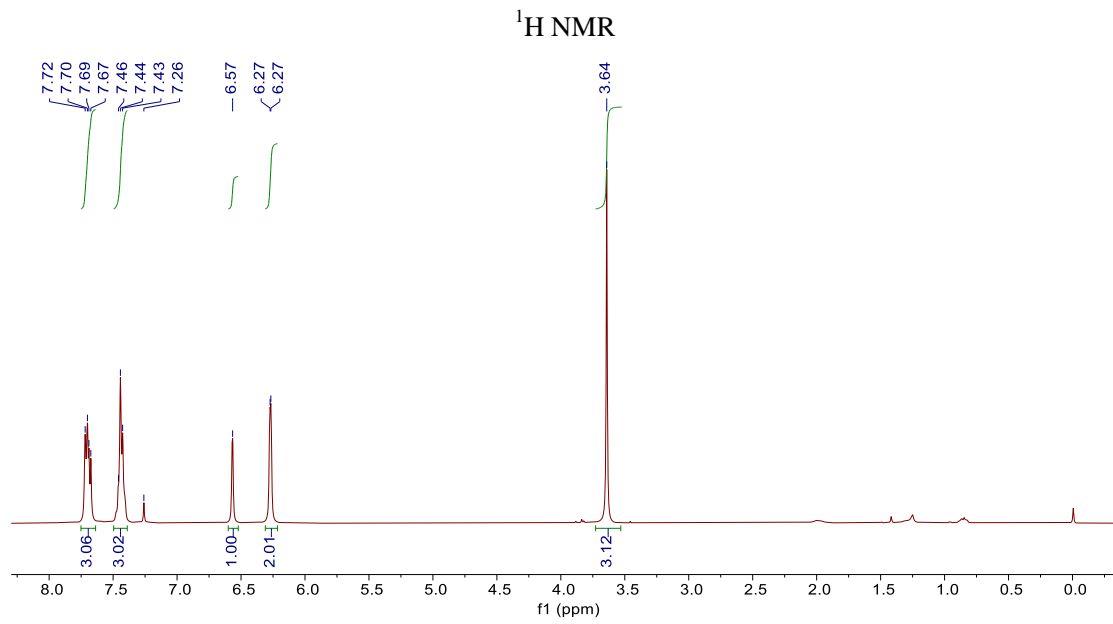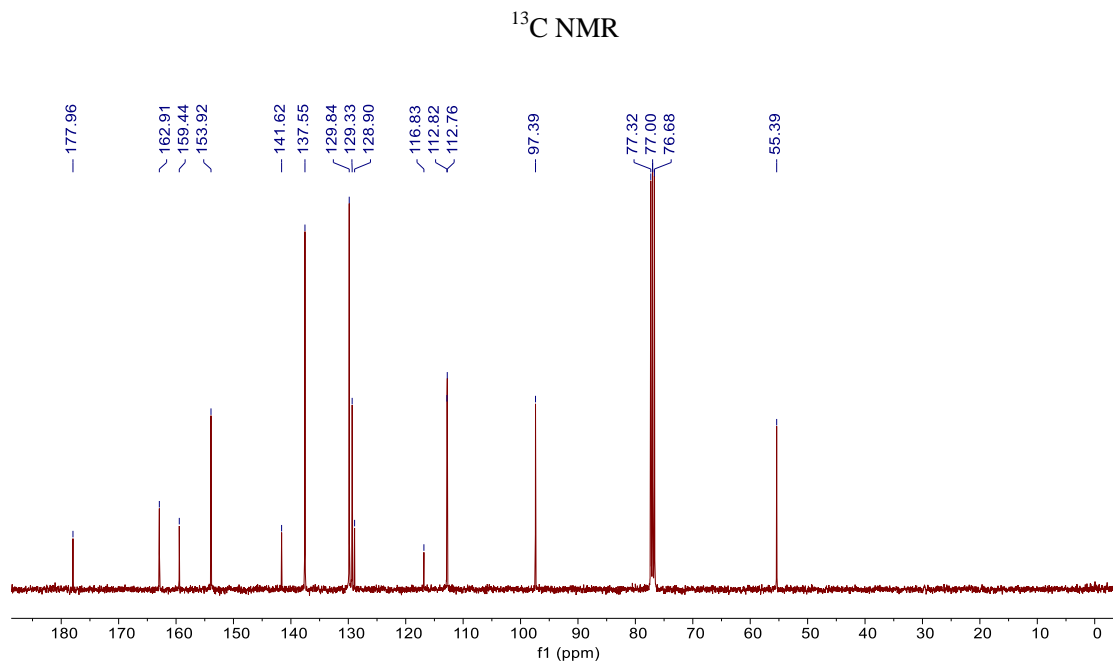

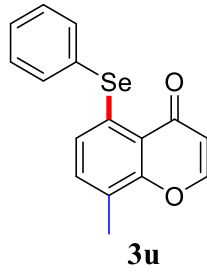

<sup>1</sup>H NMR

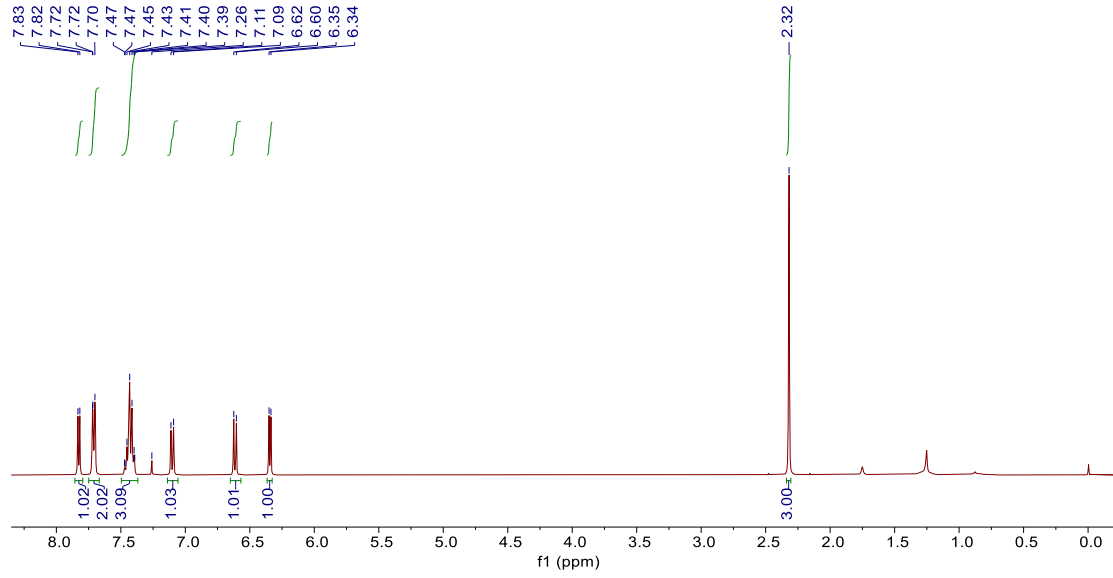

<sup>13</sup>C NMR

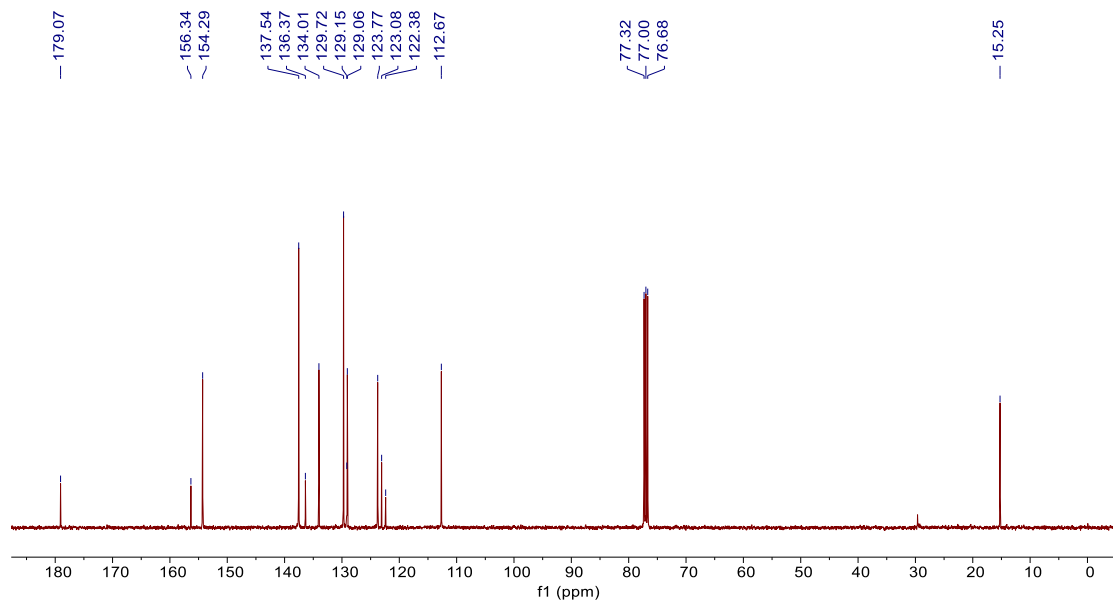

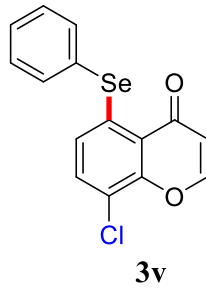

<sup>1</sup>H NMR

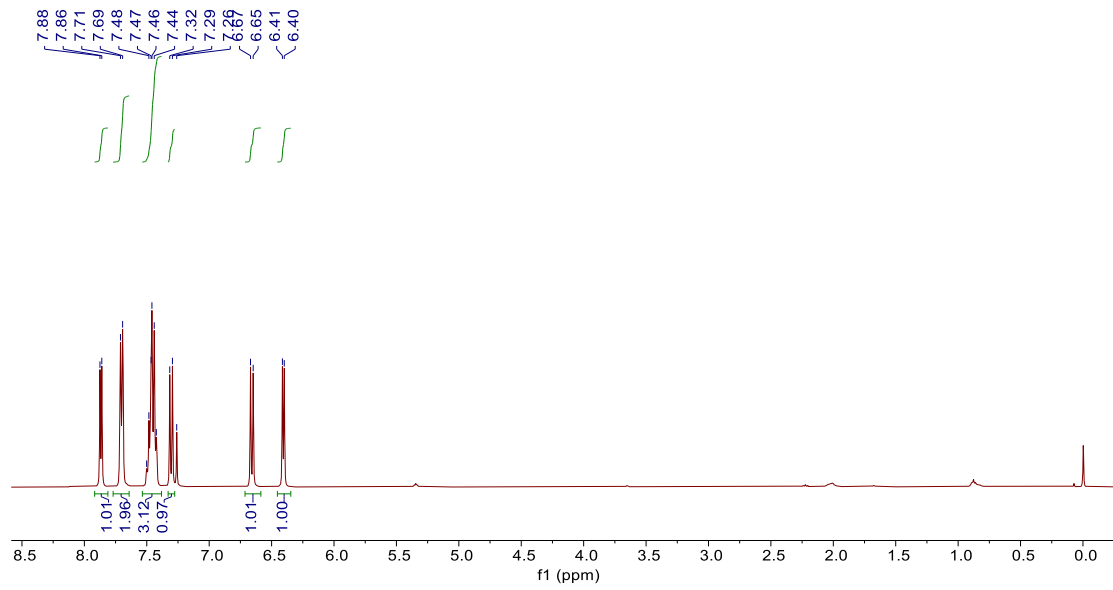

<sup>13</sup>C NMR

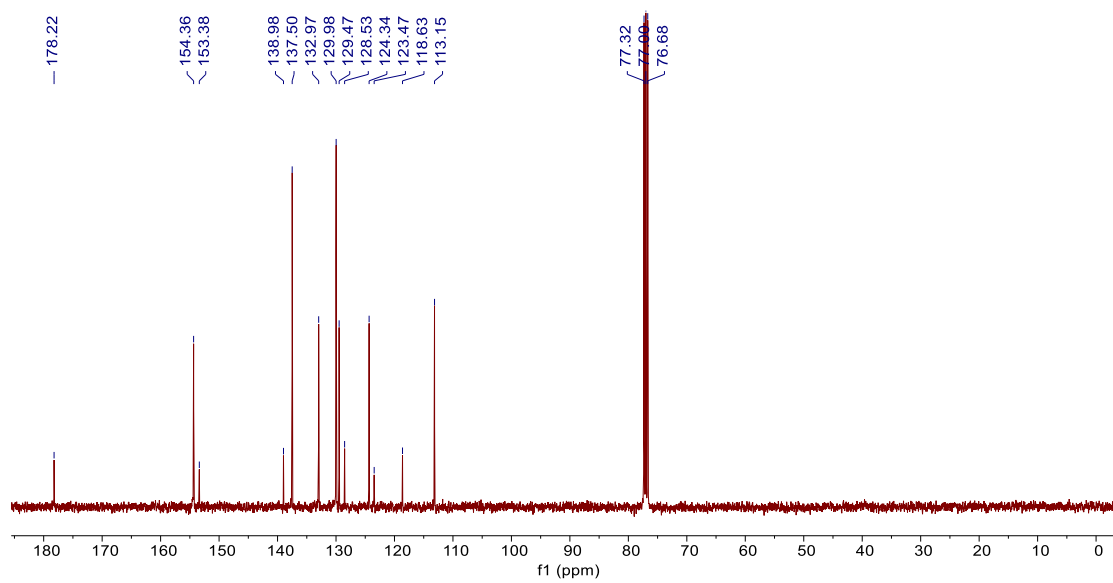

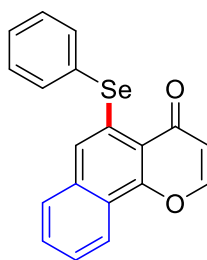

**3w**

<sup>1</sup>H NMR

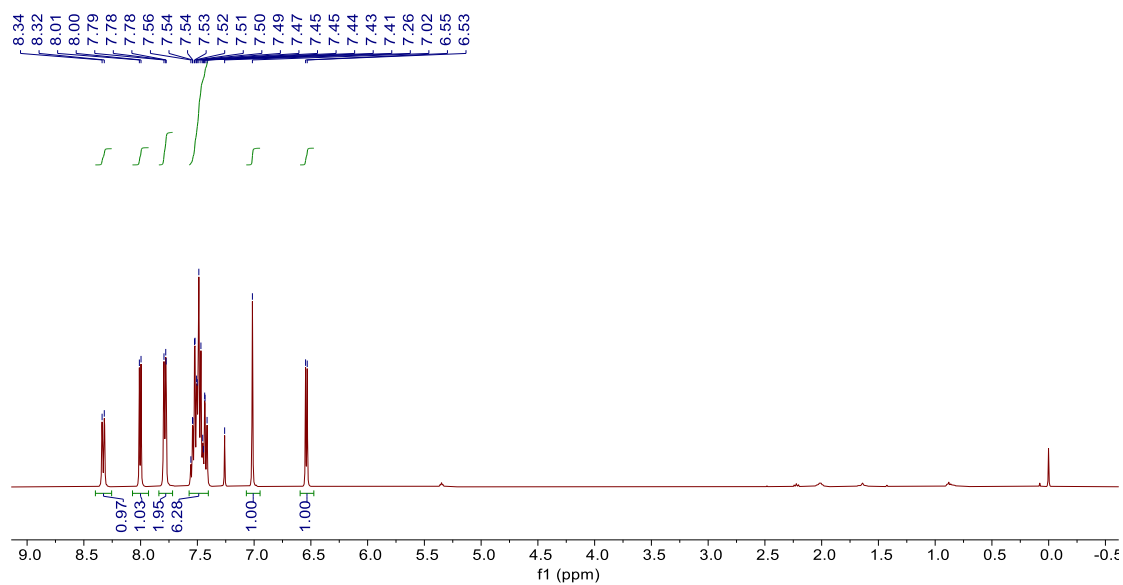

<sup>13</sup>C NMR

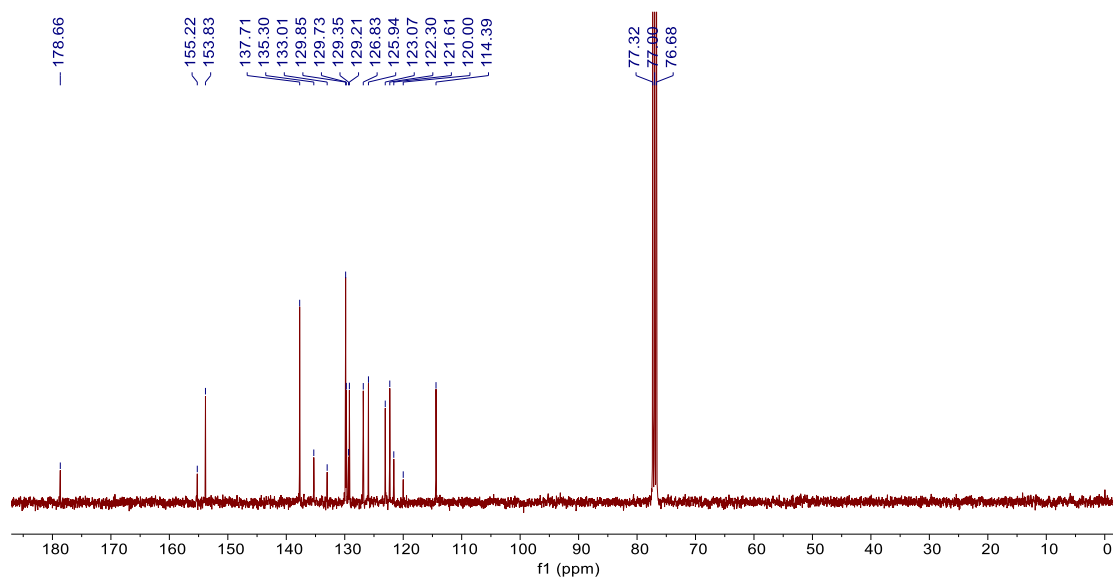

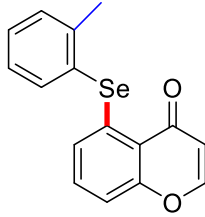

3x

<sup>1</sup>H NMR

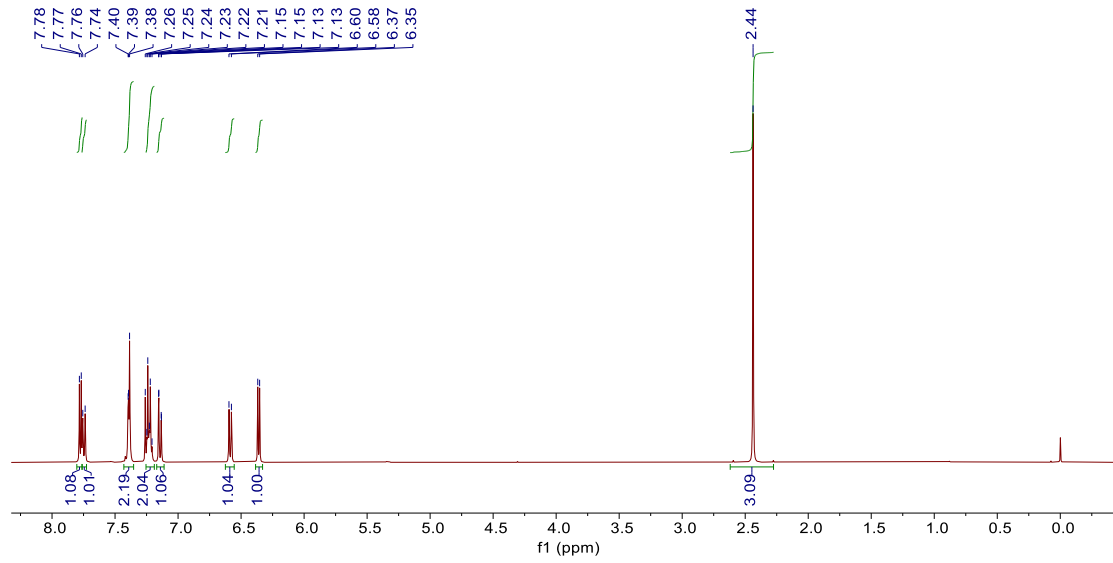

<sup>13</sup>C NMR

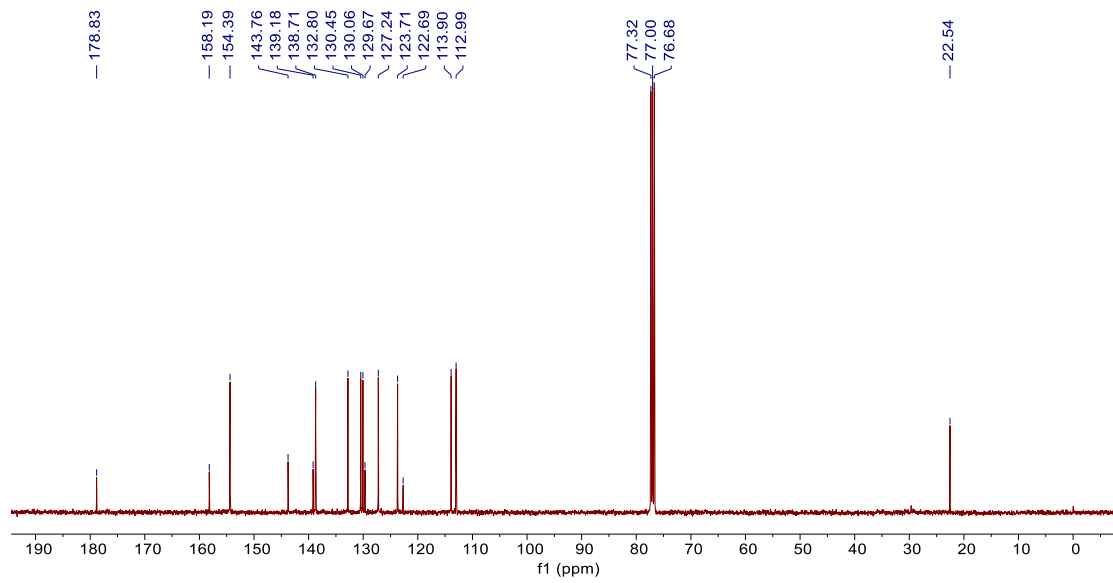

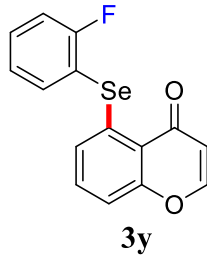

<sup>1</sup>H NMR

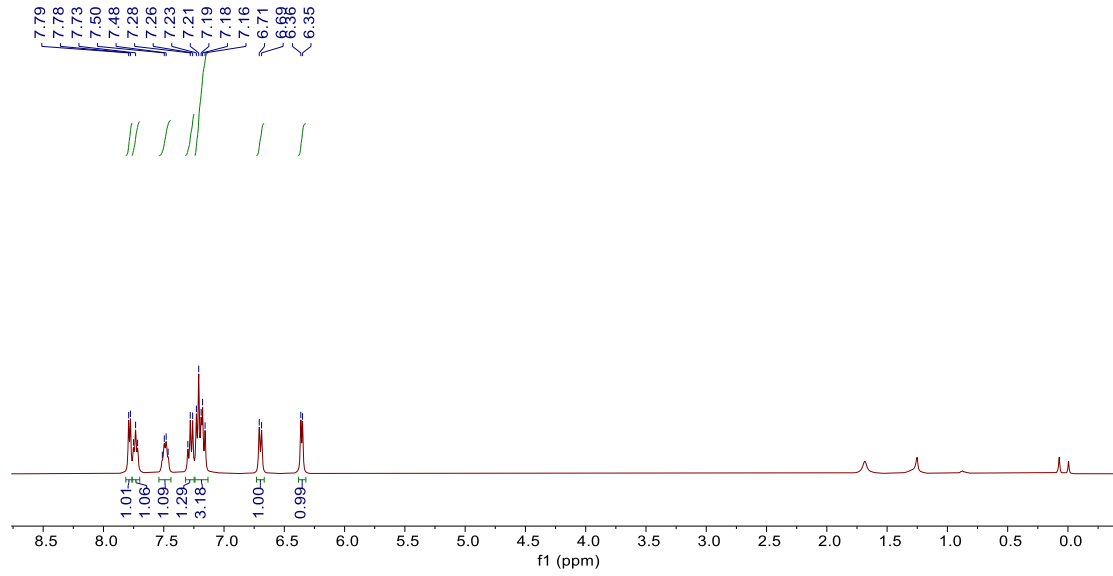

<sup>13</sup>C NMR

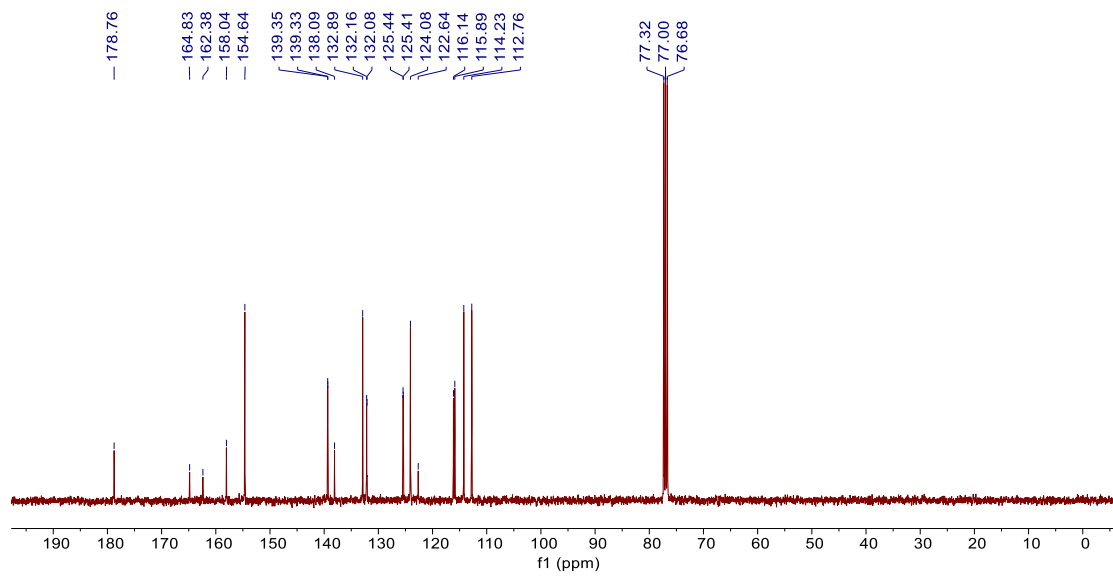



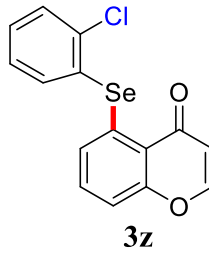

<sup>1</sup>H NMR

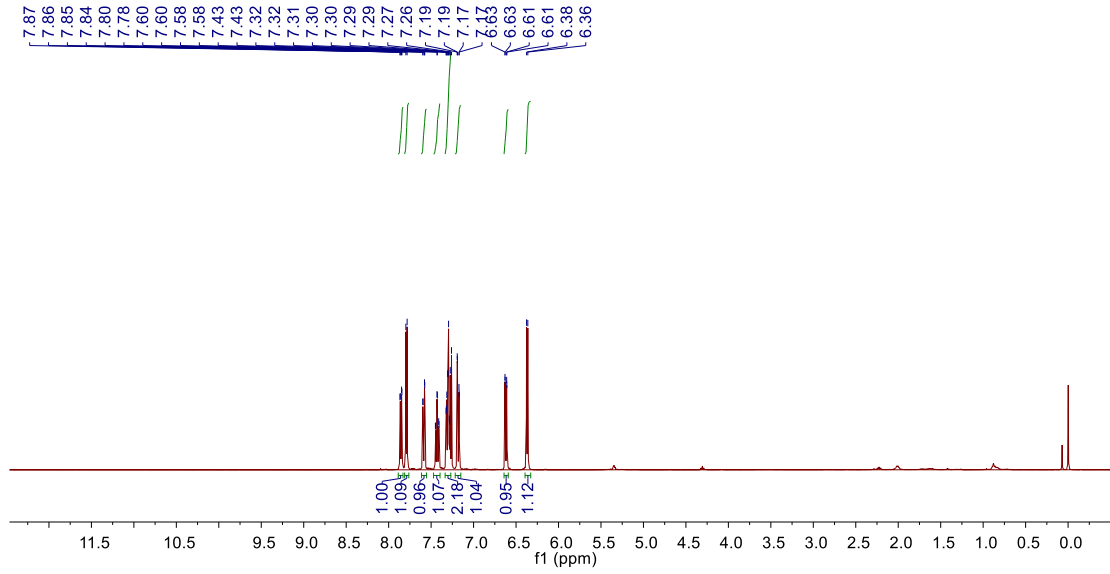

<sup>13</sup>C NMR

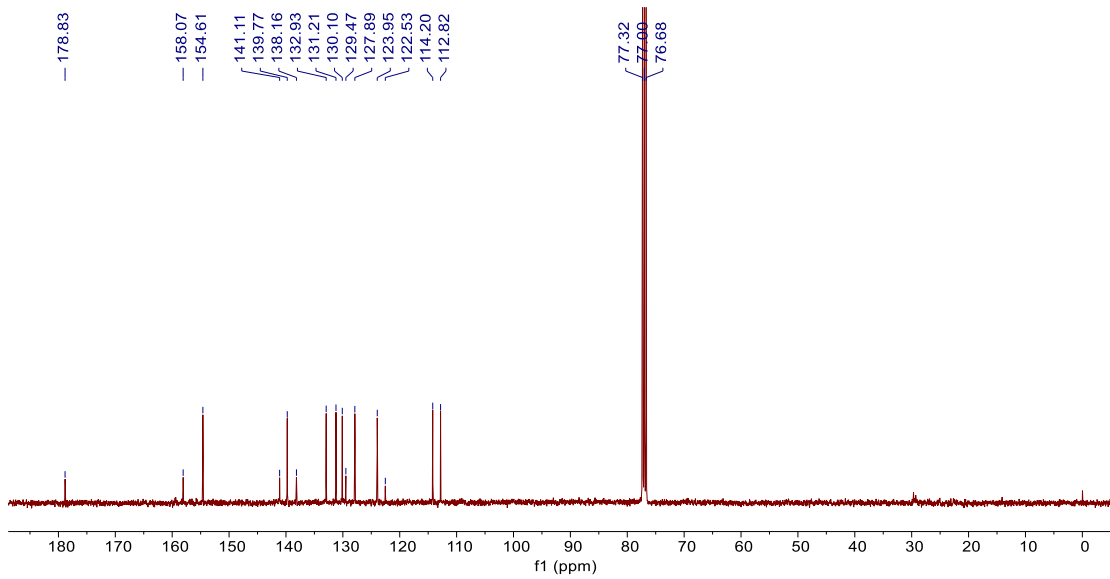

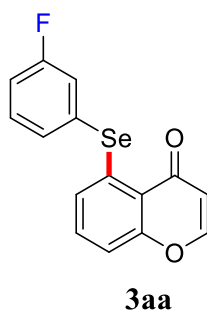

<sup>1</sup>H NMR

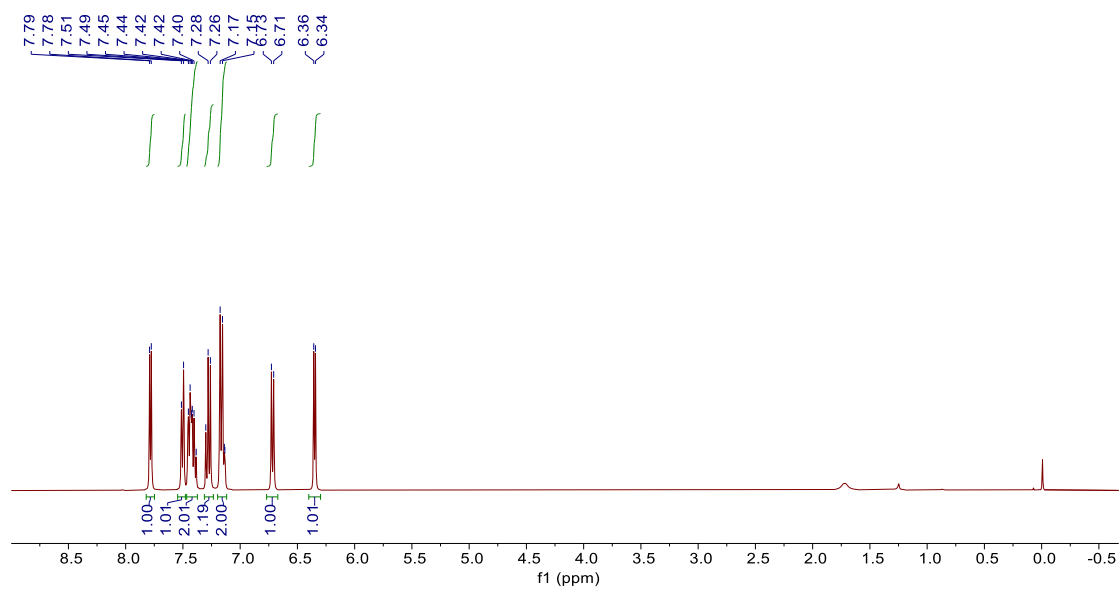

<sup>13</sup>C NMR

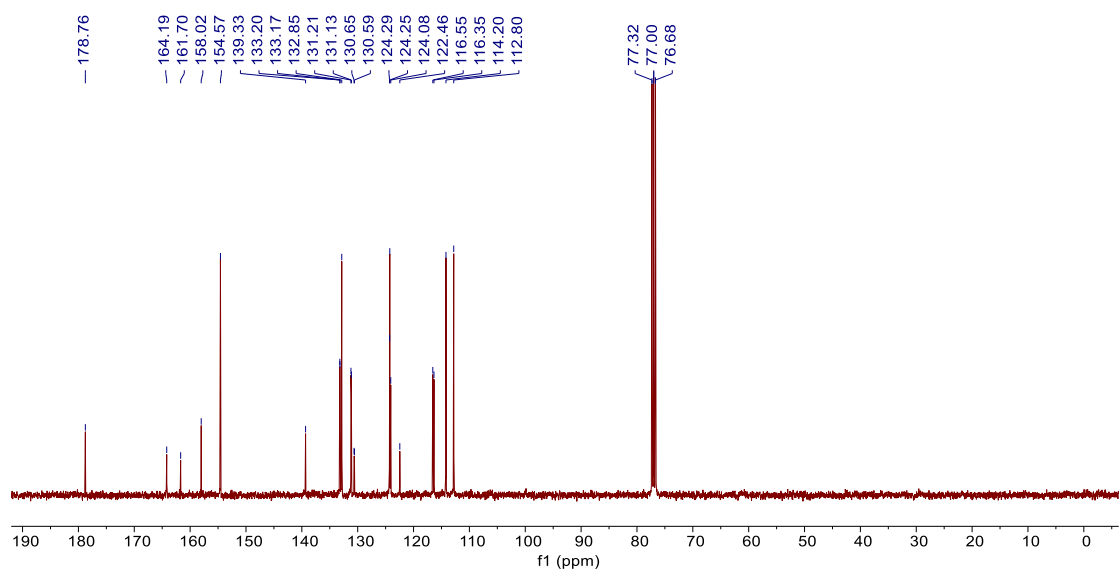

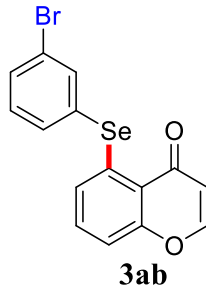

$^1\text{H NMR}$

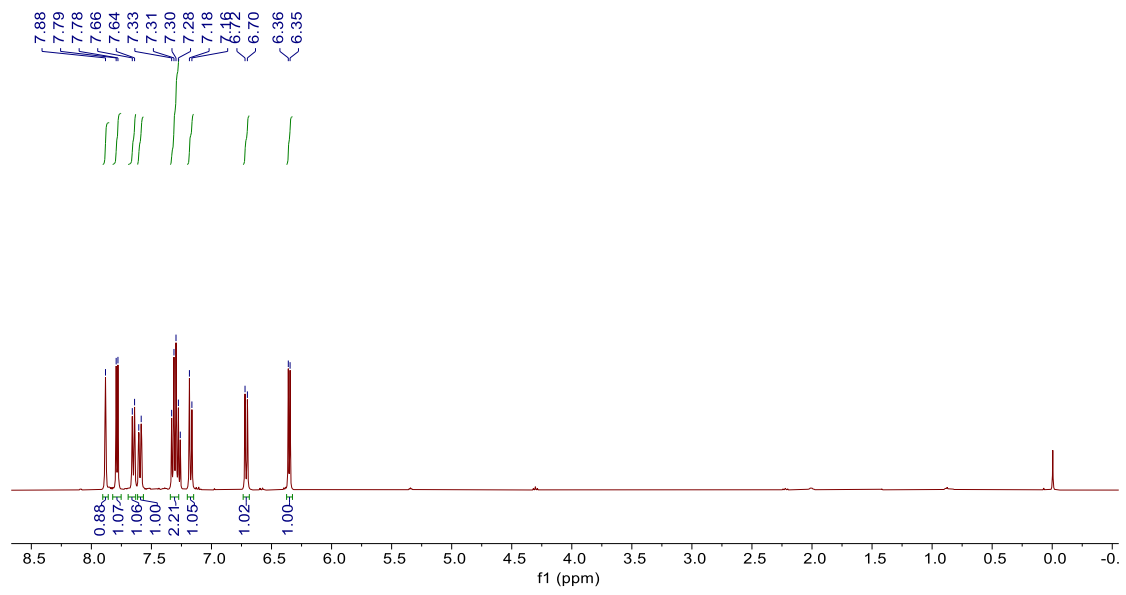

$^{13}\text{C NMR}$

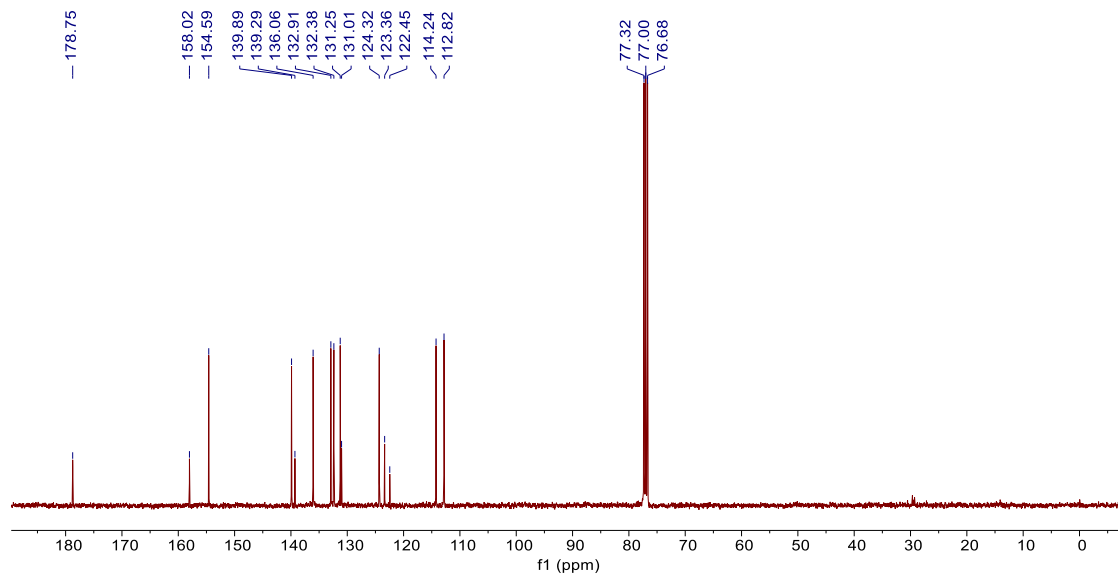

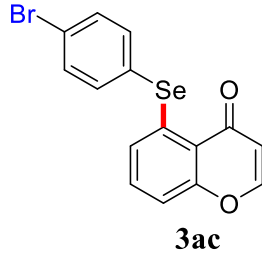

<sup>1</sup>H NMR

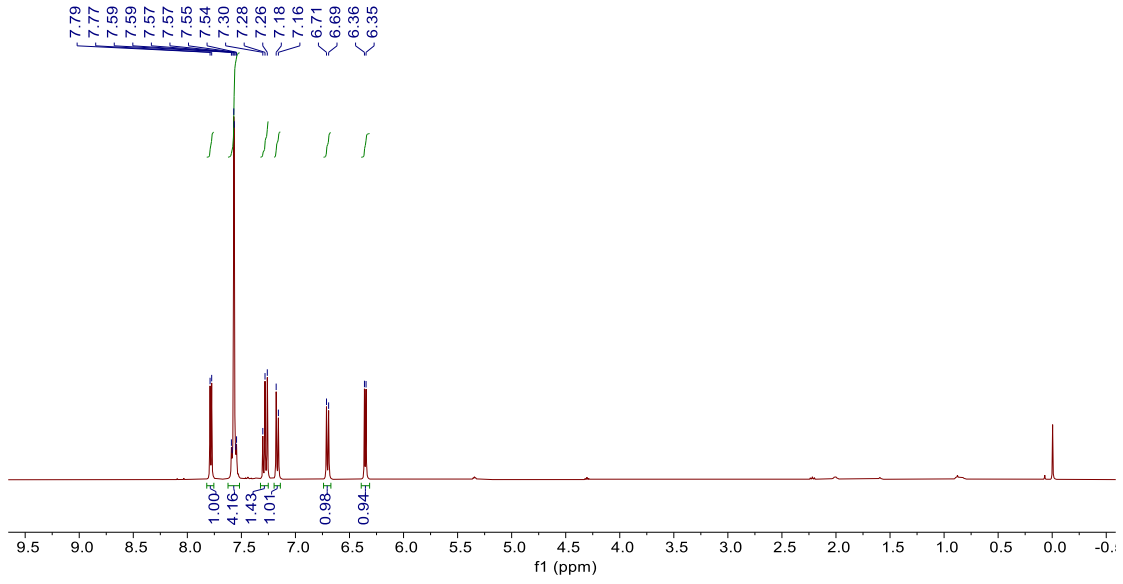

<sup>13</sup>C NMR

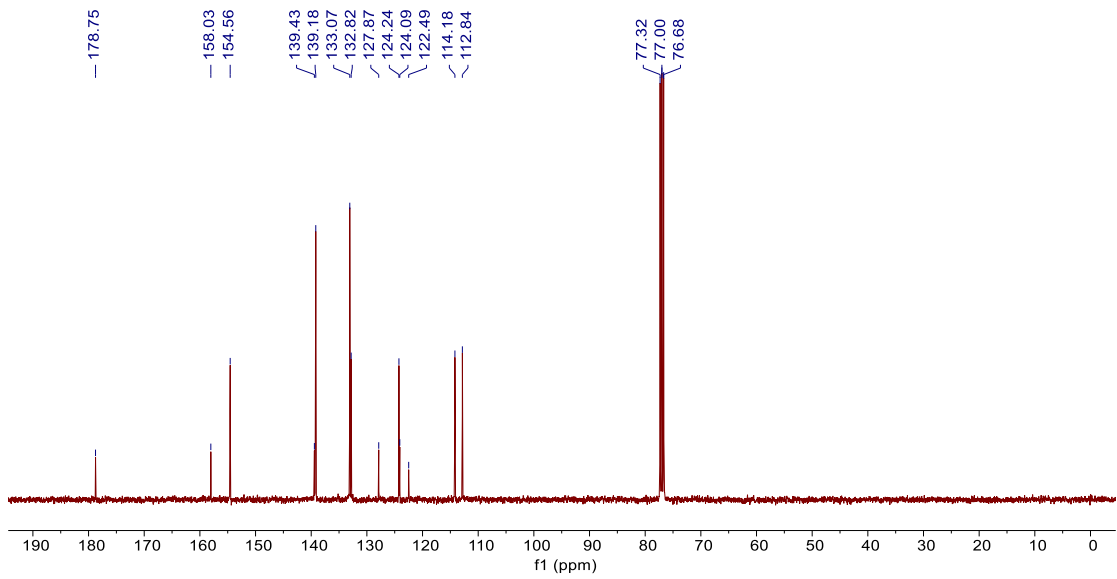

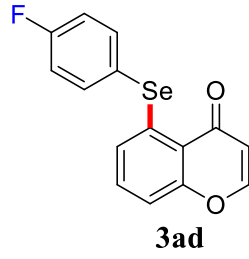

<sup>1</sup>H NMR

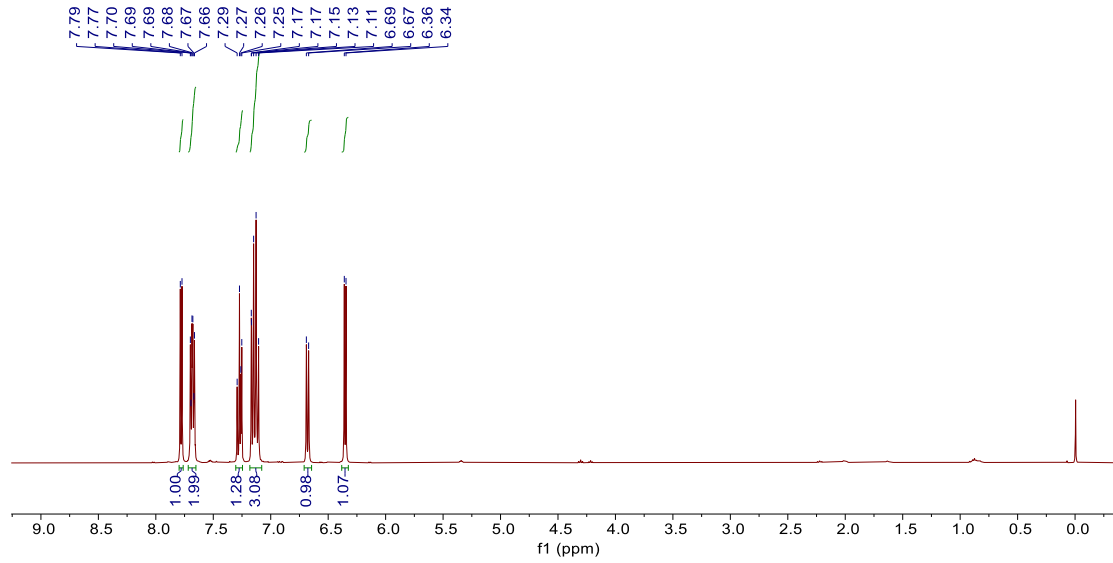

<sup>13</sup>C NMR

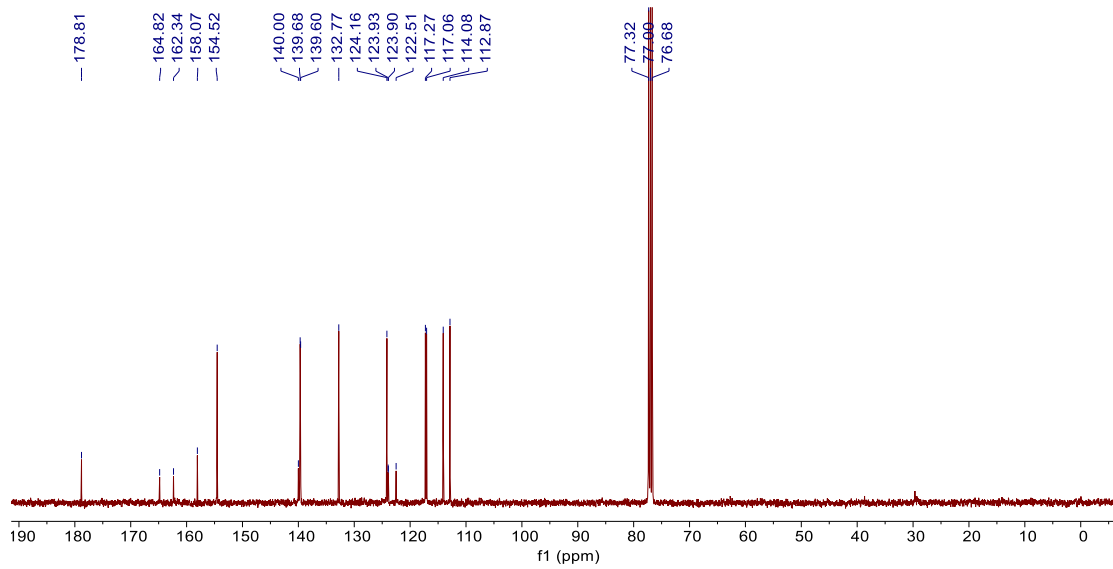

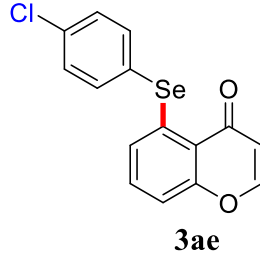

<sup>1</sup>H NMR

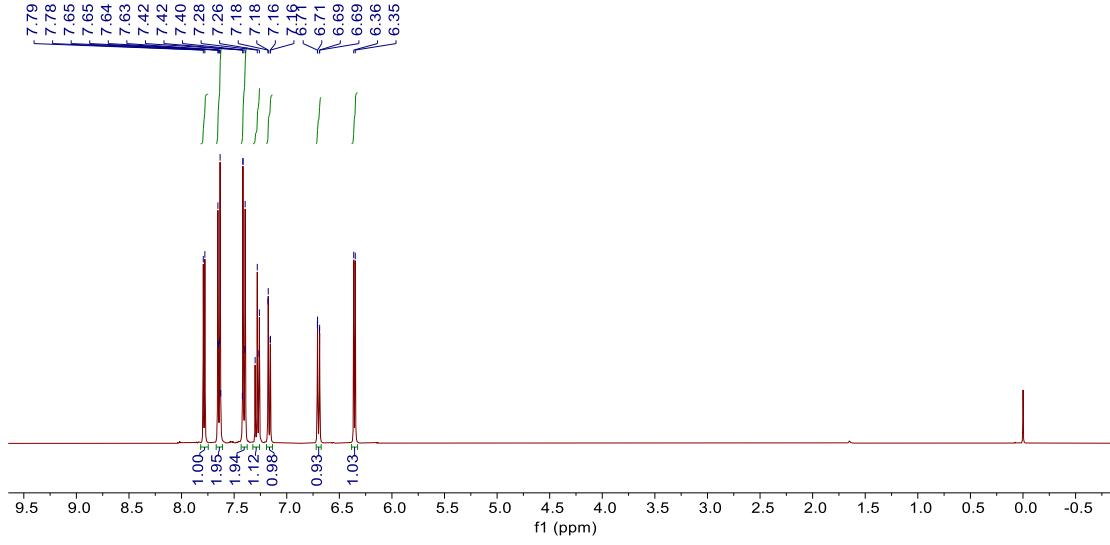

<sup>13</sup>C NMR

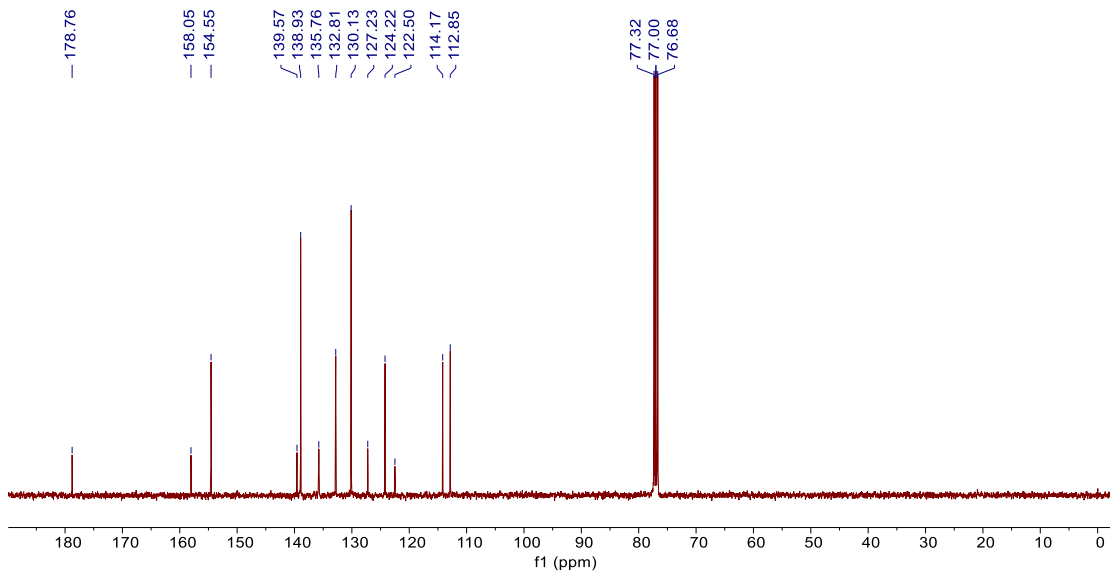

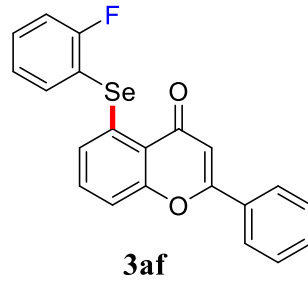

$^1\text{H NMR}$

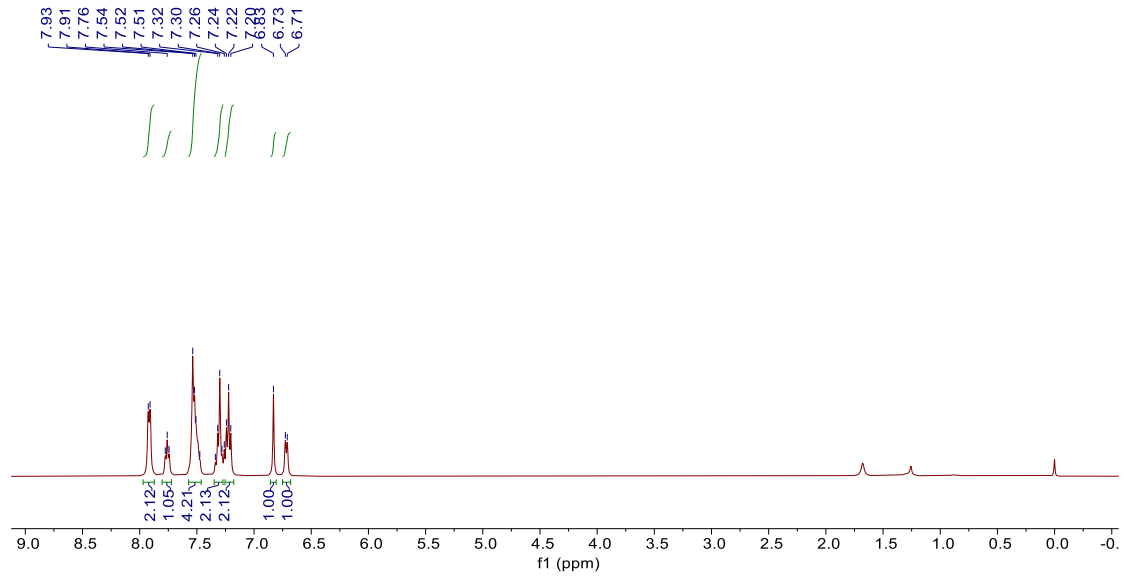

$^{13}\text{C NMR}$

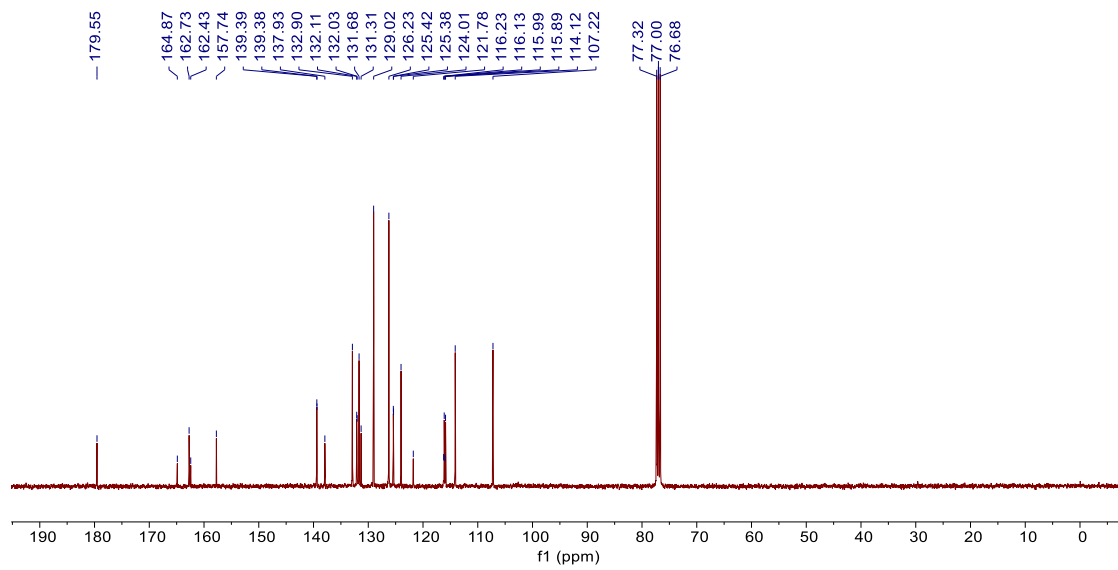

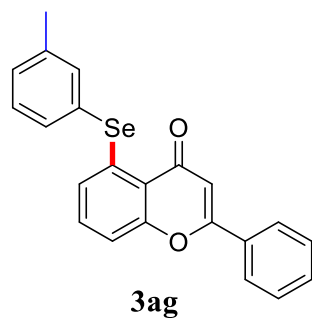

<sup>1</sup>H NMR

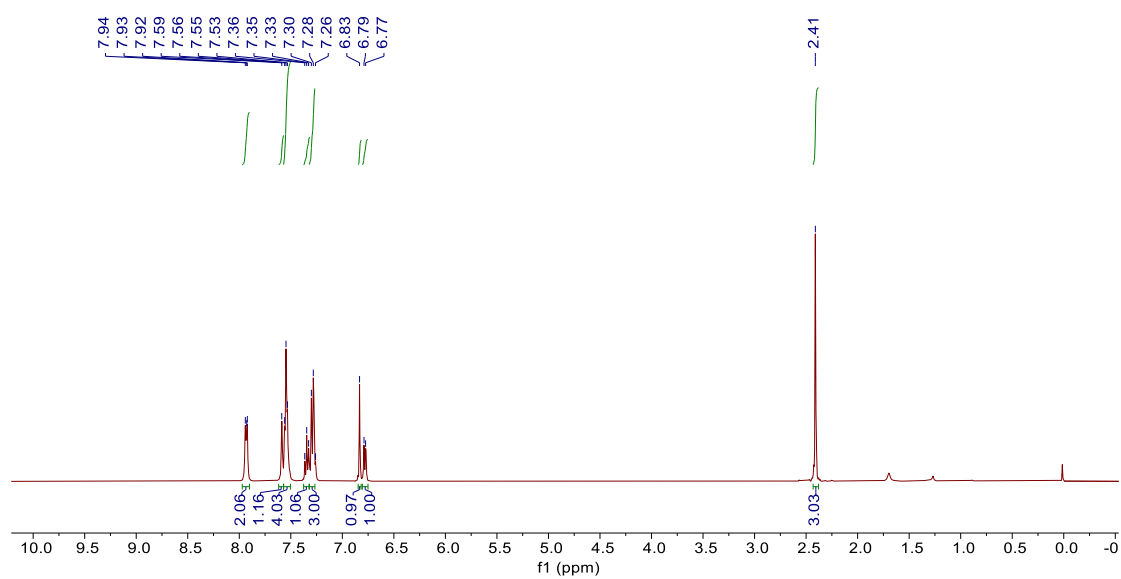

<sup>13</sup>C NMR

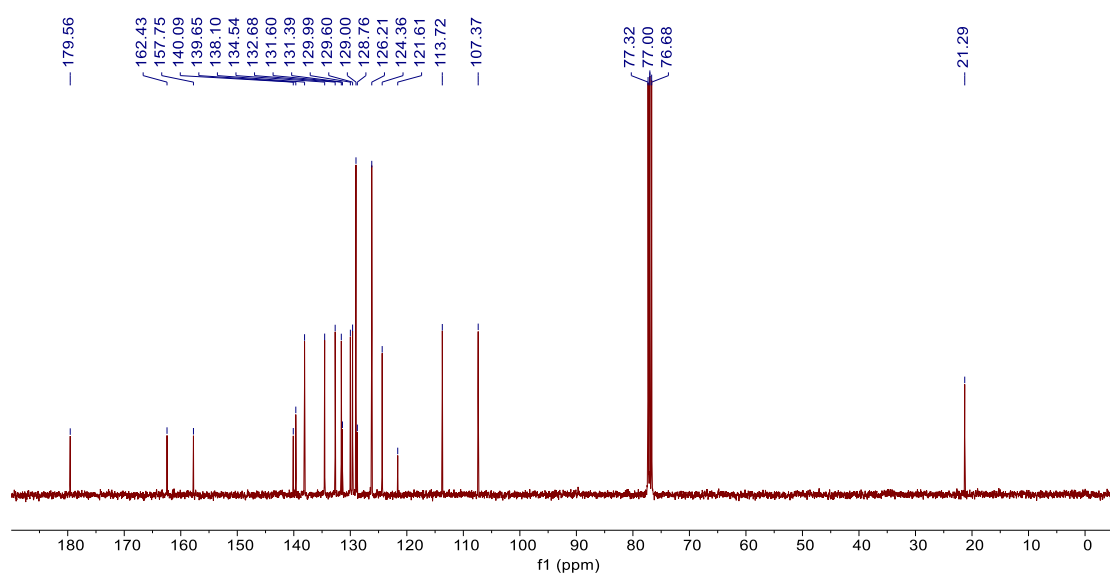



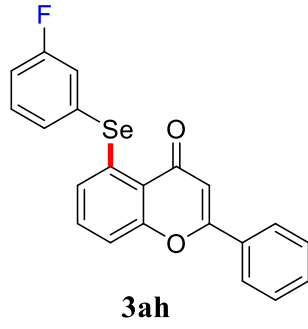

<sup>1</sup>H NMR

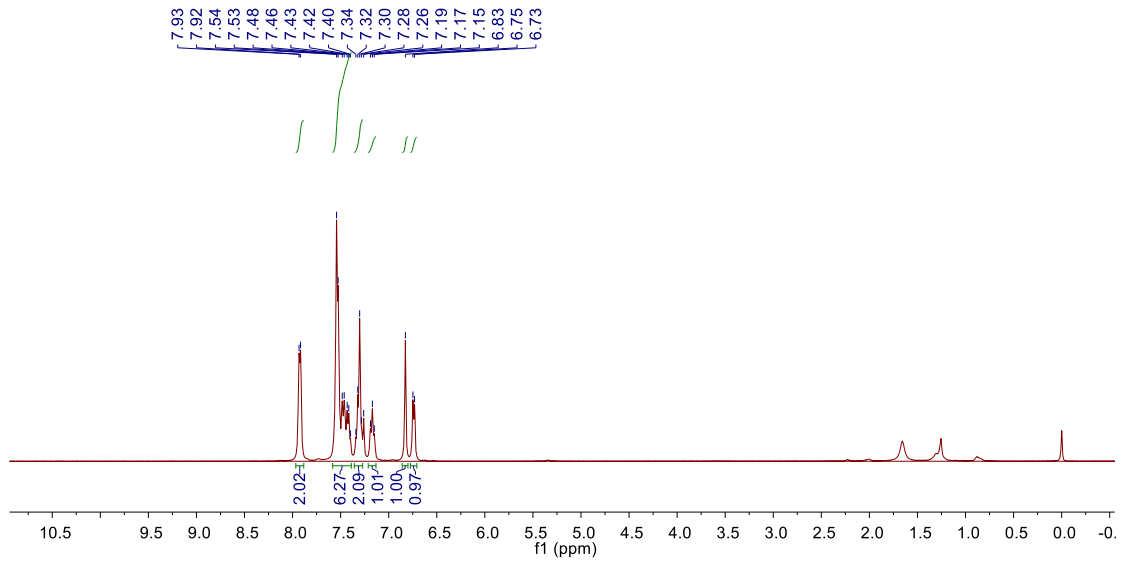

<sup>13</sup>C NMR

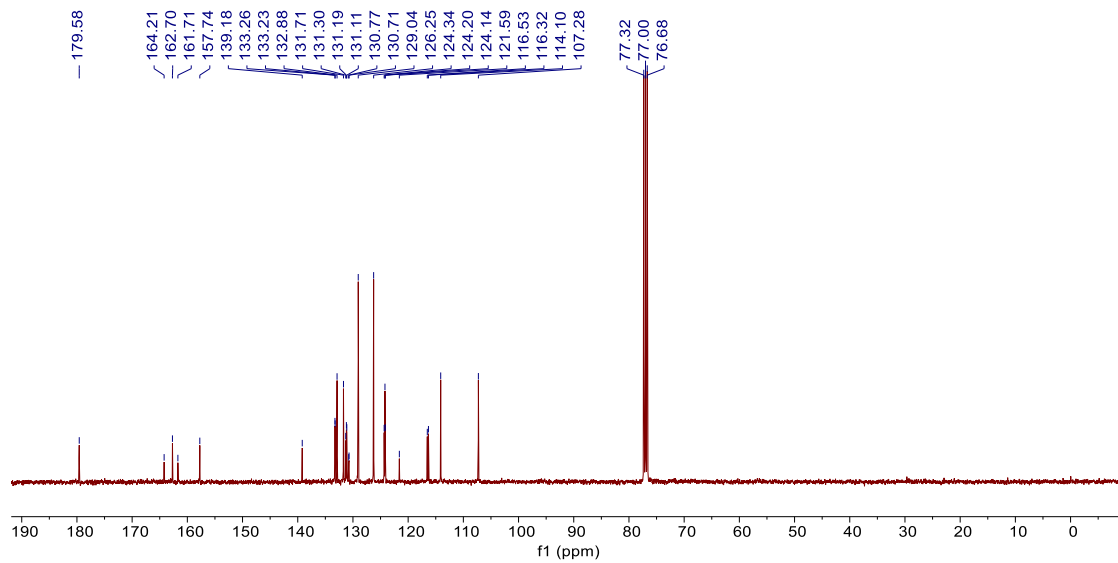

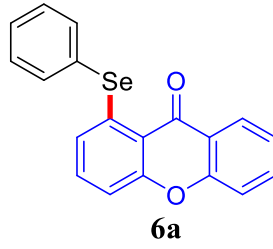

<sup>1</sup>H NMR

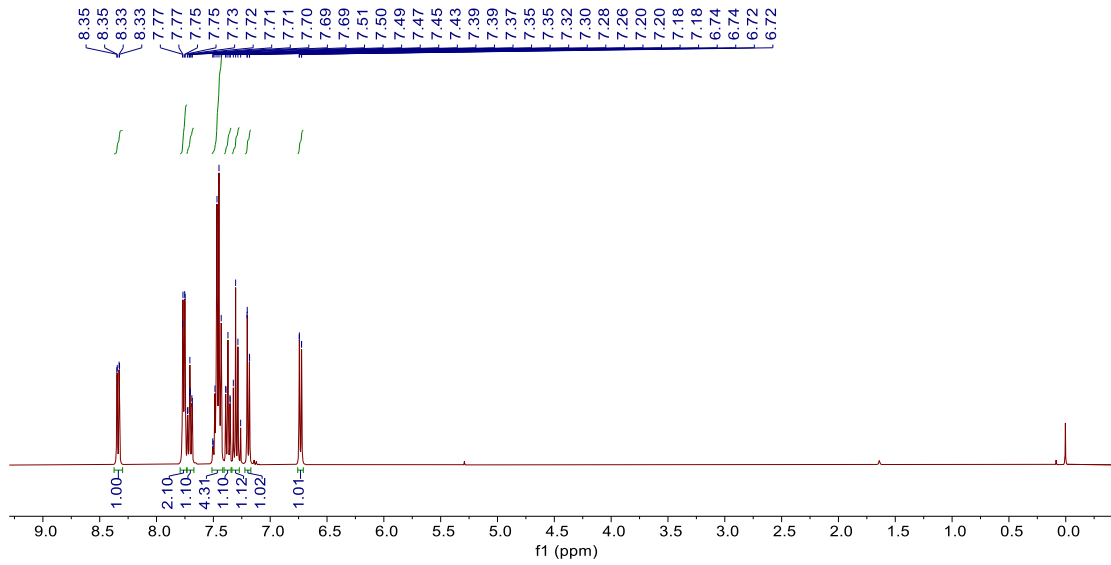

<sup>13</sup>C NMR

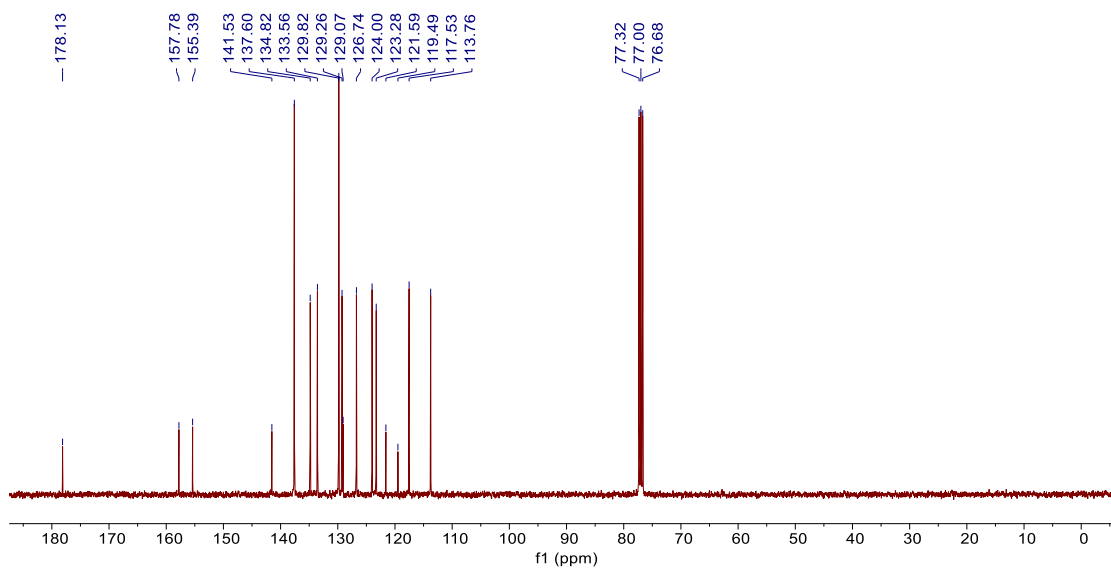

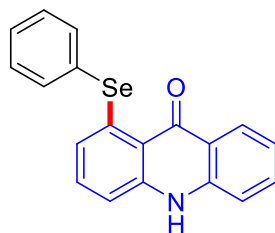

**6b**

<sup>1</sup>H NMR

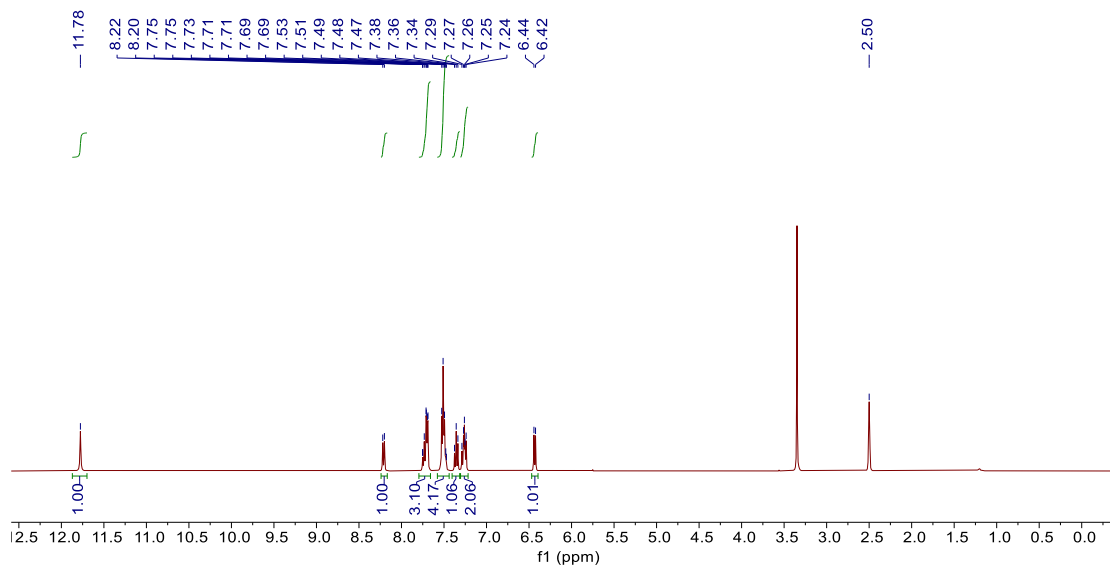

<sup>13</sup>C NMR

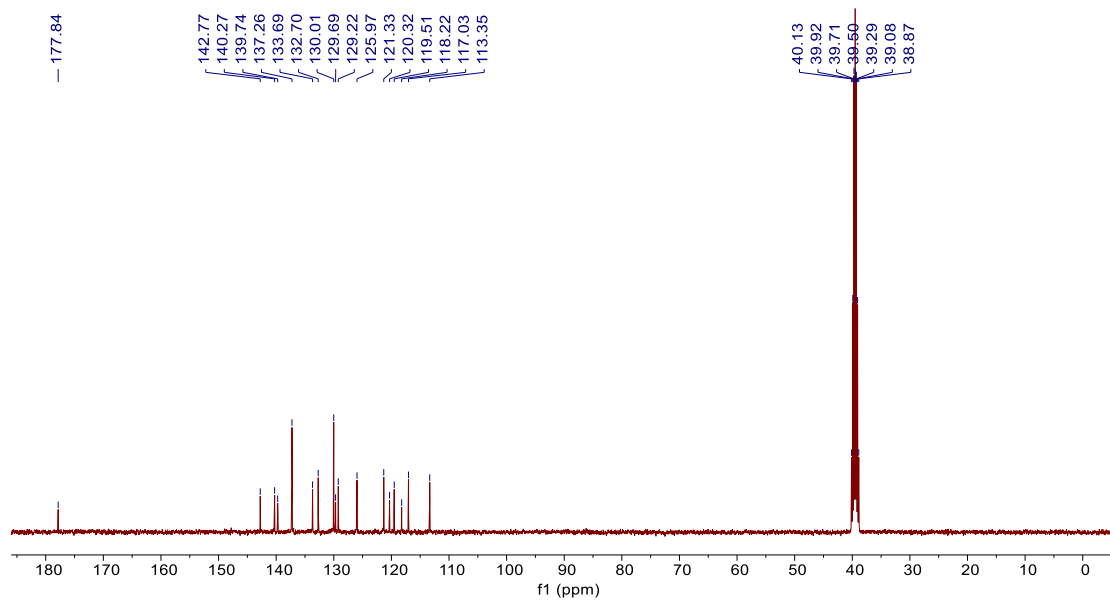

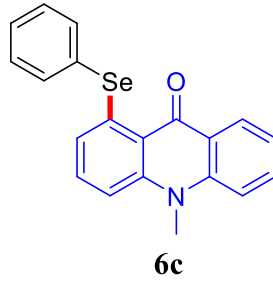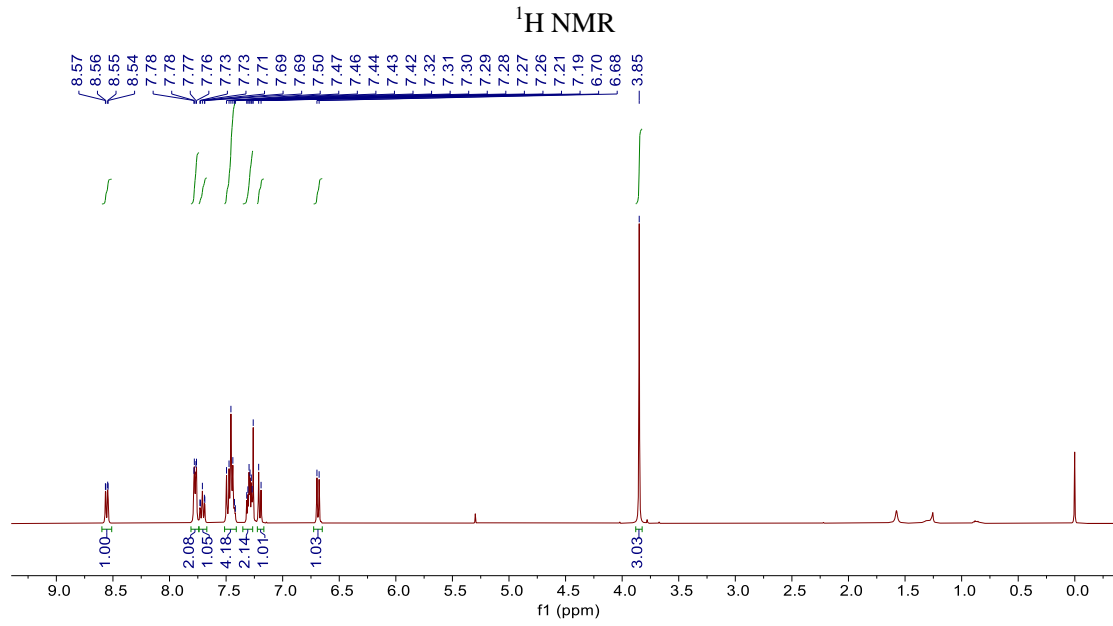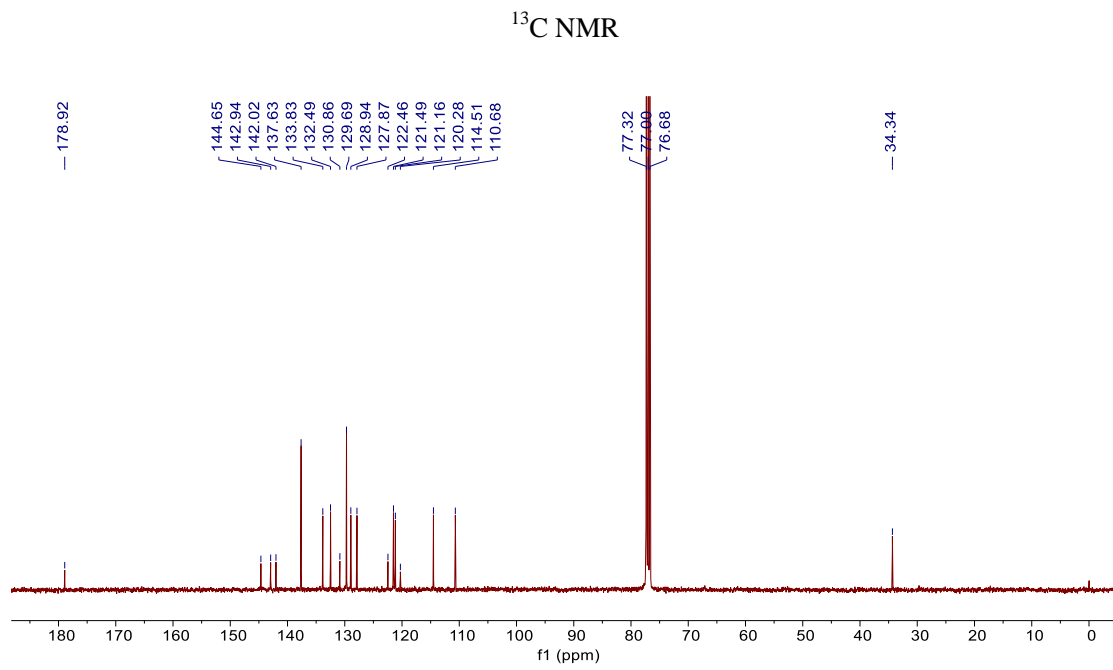

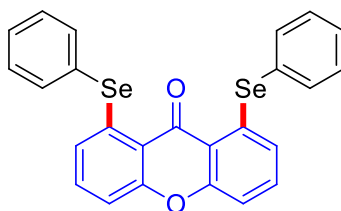

6d

$^1\text{H NMR}$

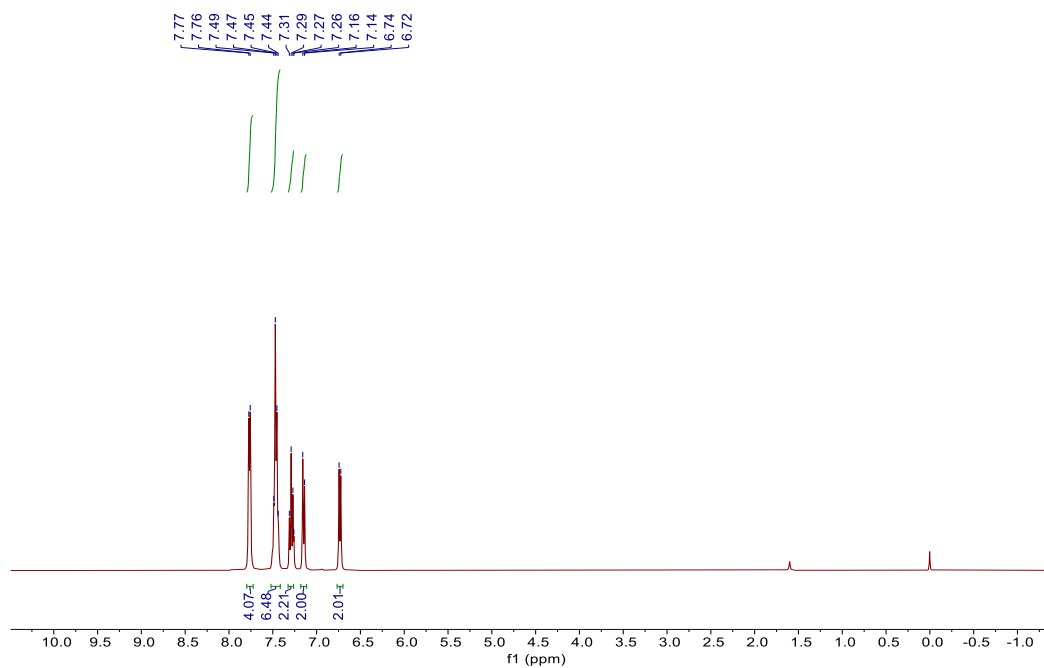

$^{13}\text{C NMR}$

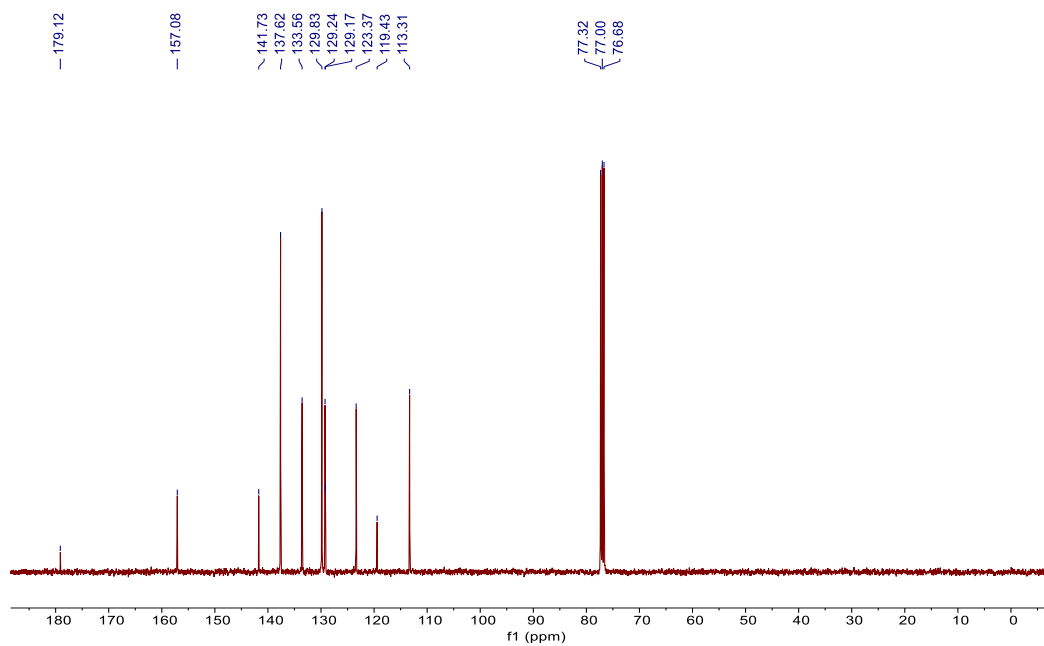

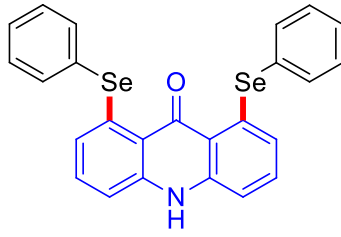

6e

<sup>1</sup>H NMR

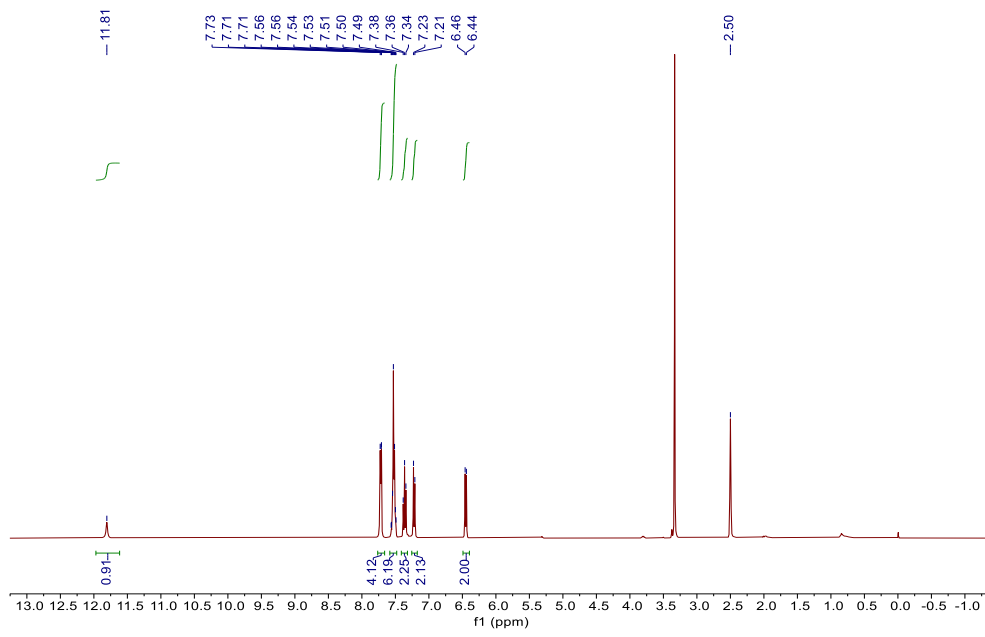

<sup>13</sup>C NMR

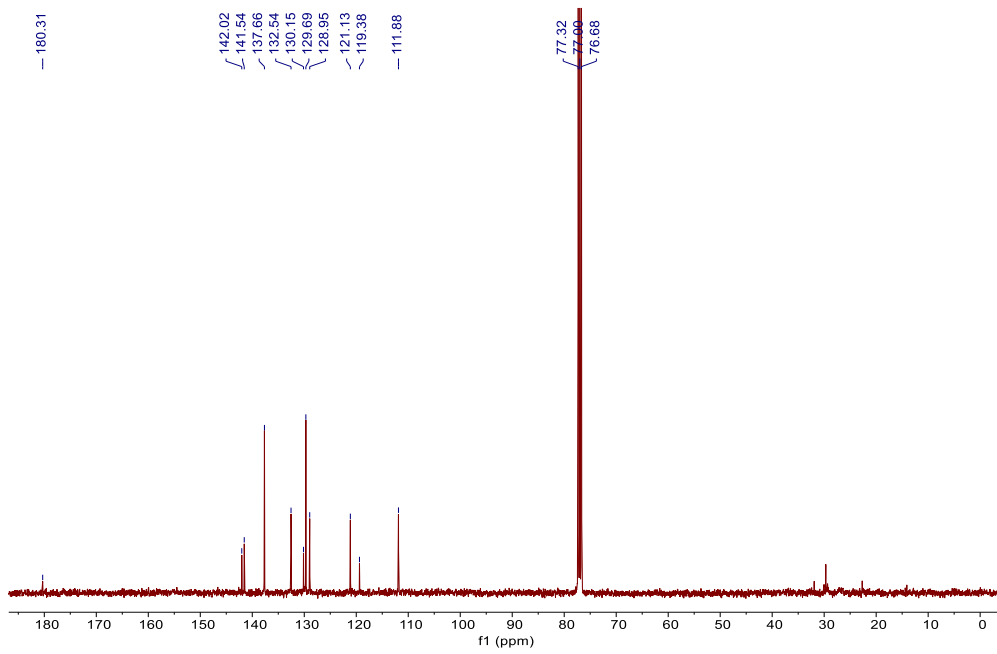

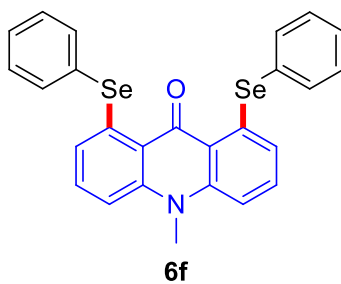

<sup>1</sup>H NMR

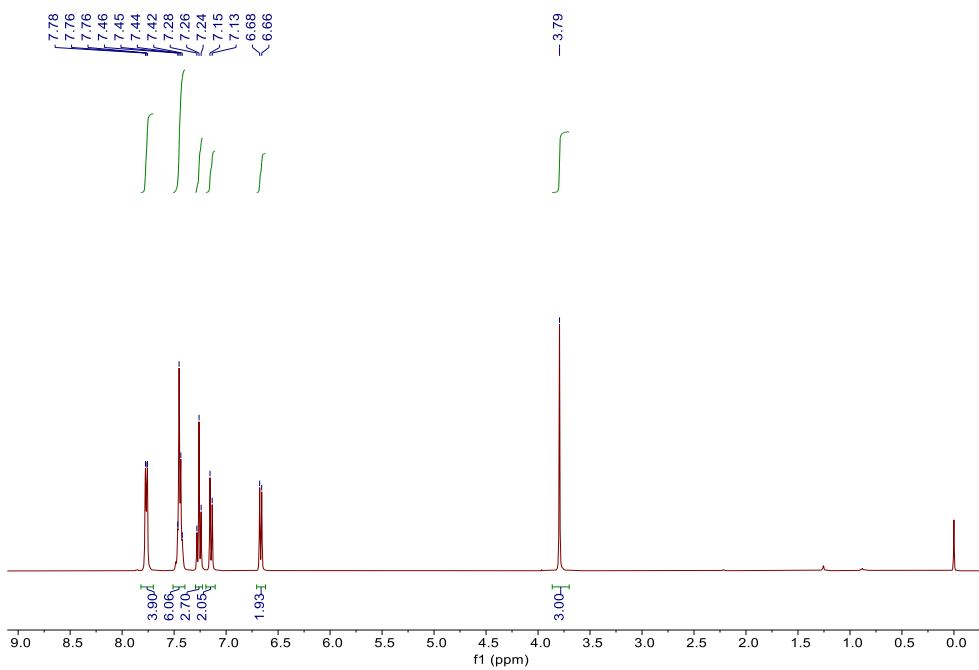

<sup>13</sup>C NMR

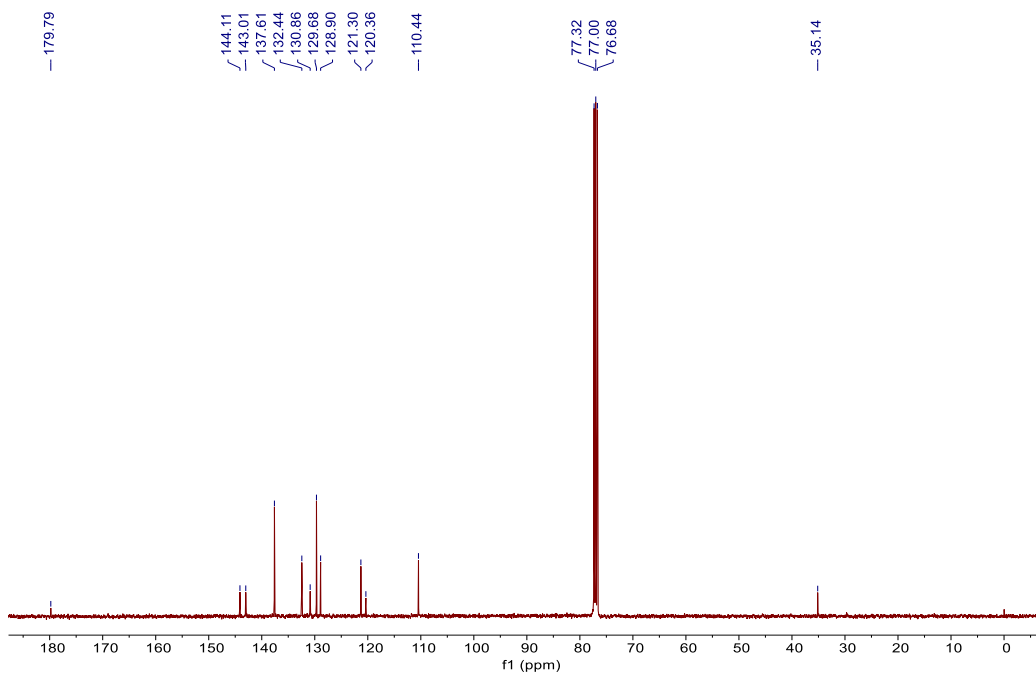

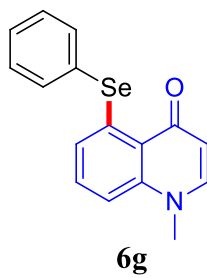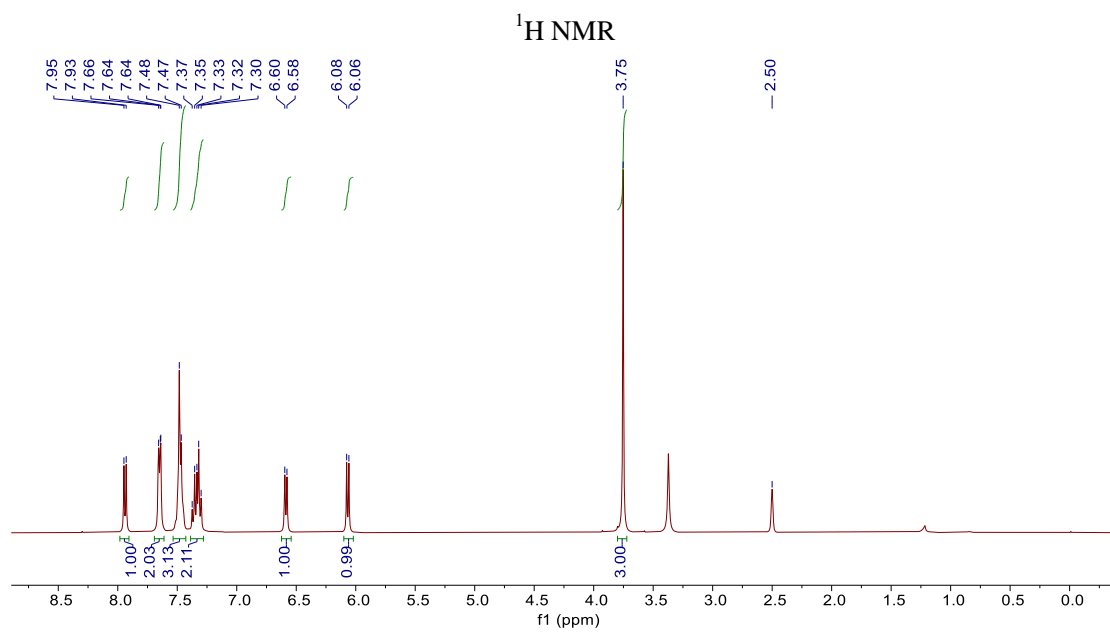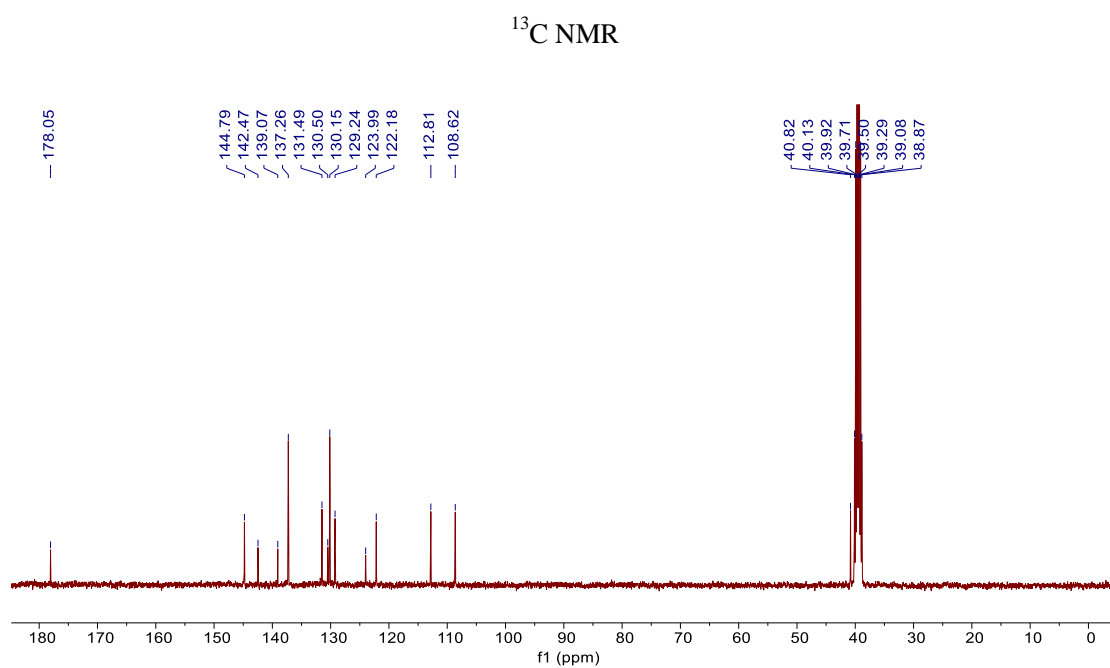



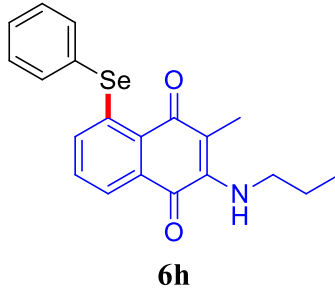

<sup>1</sup>H NMR

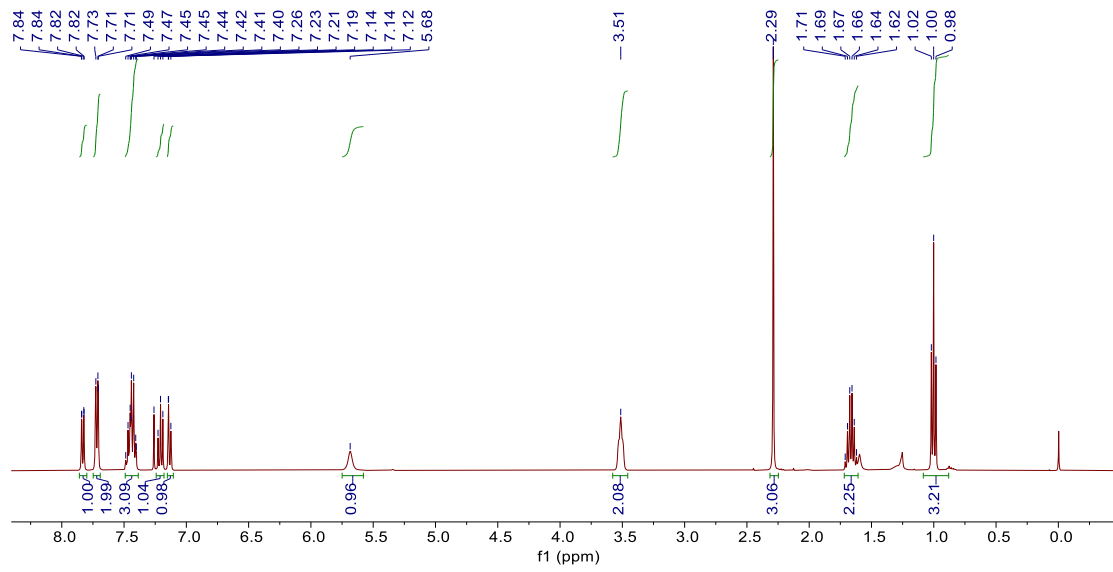

<sup>13</sup>C NMR

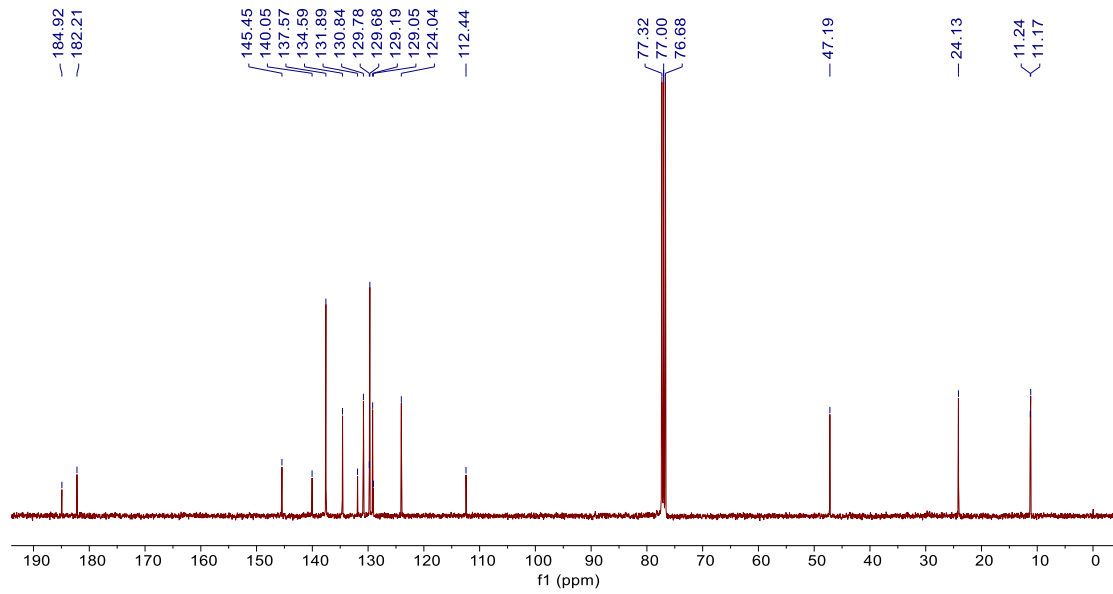

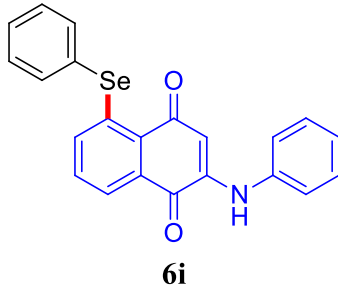

<sup>1</sup>H NMR

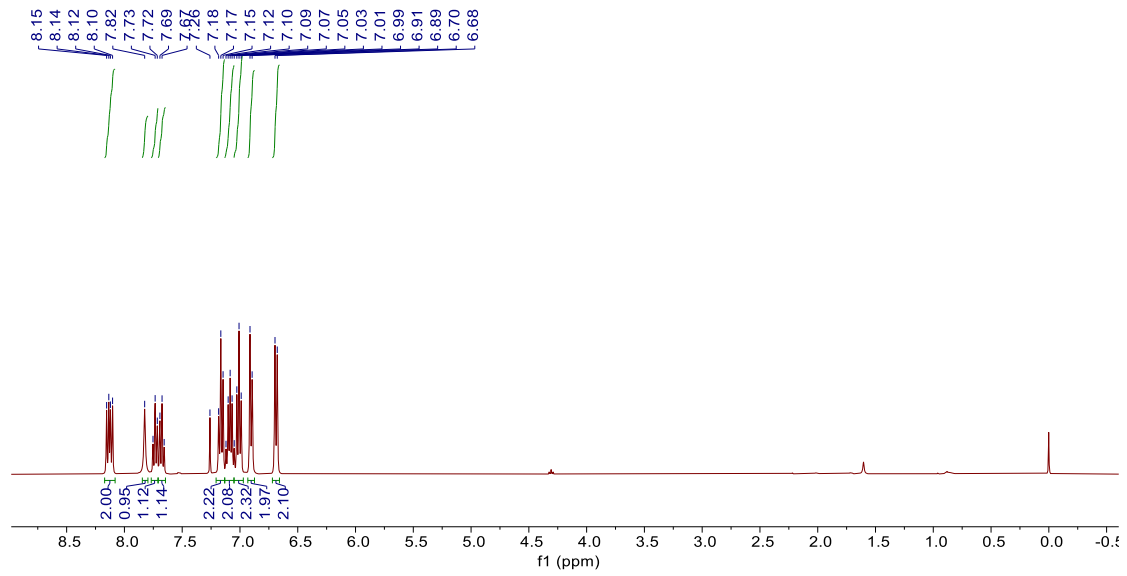

<sup>13</sup>C NMR

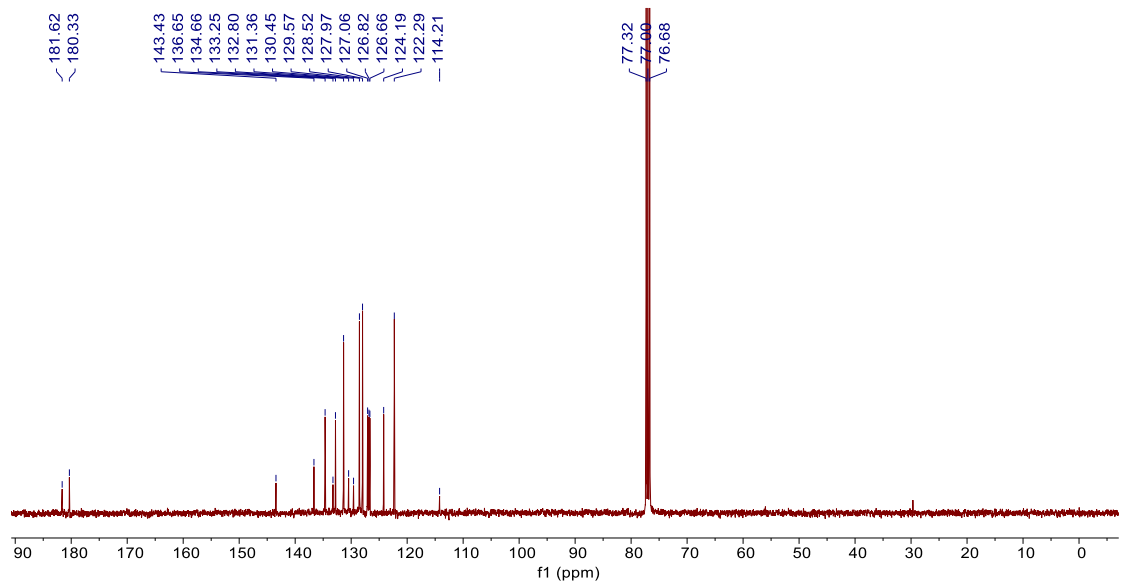

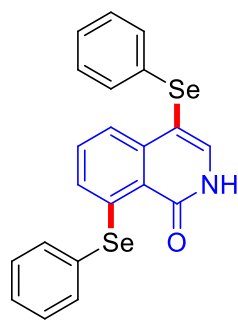

6j

<sup>1</sup>H NMR

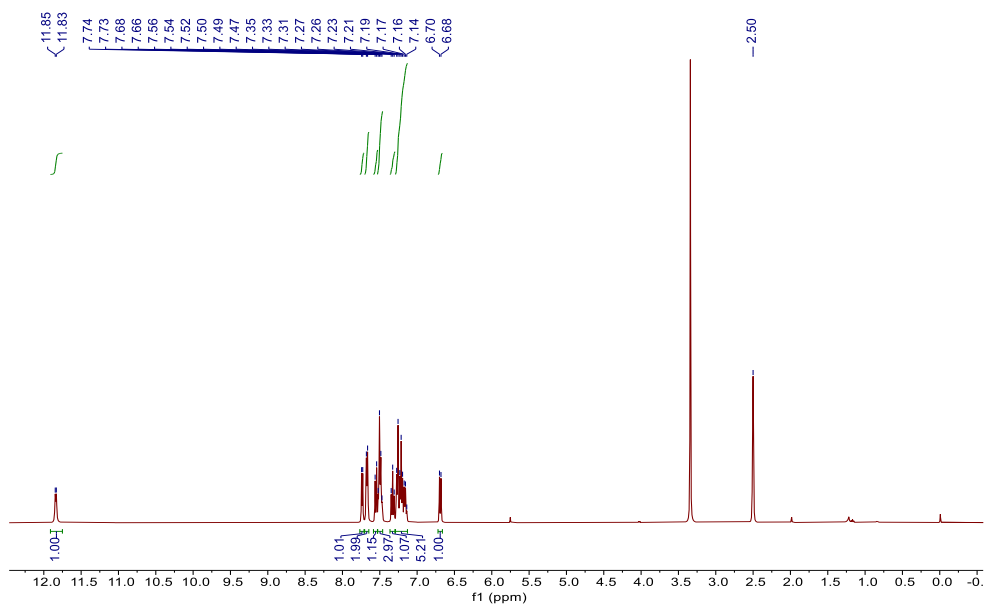

<sup>13</sup>C NMR

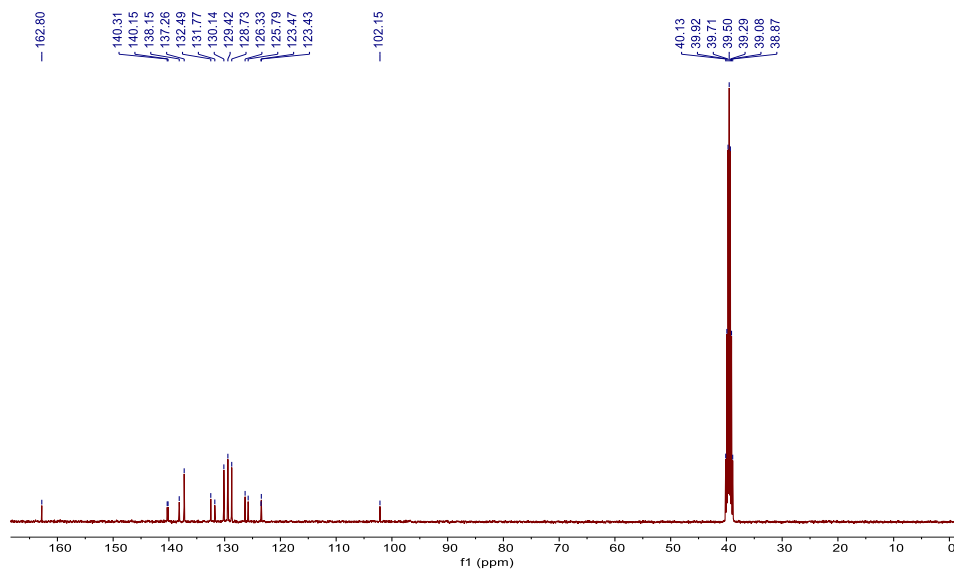

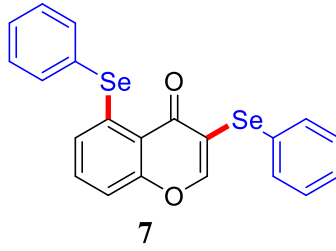

<sup>1</sup>H NMR

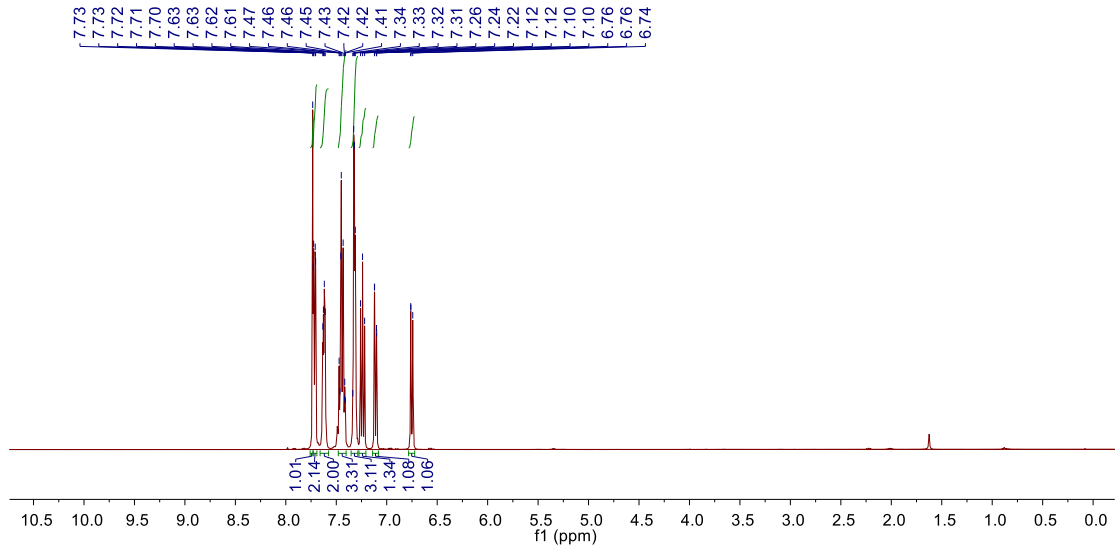

<sup>13</sup>C NMR

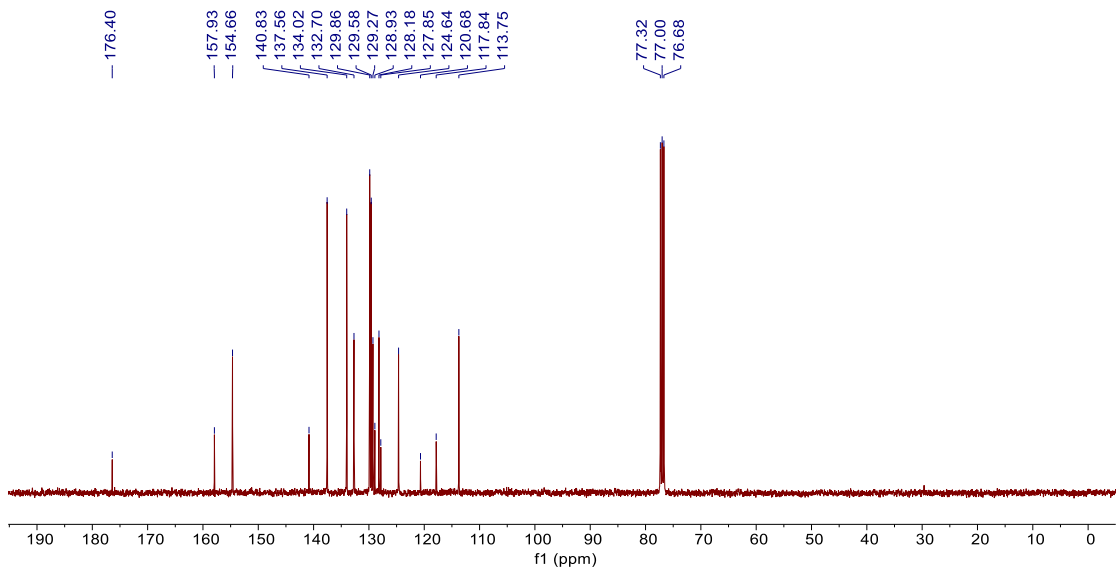

Supplement: d2cc04030a1.pdf [file d2cc04030a1.pdf]
